# Supplementary material for: Initial prescriptions and medication switches of biological products: an analysis of prescription pathways and determinants in the Swiss healthcare setting
Source: PubMed Central journal article supplement — BMJ Open. 2023 Nov 21;13(11):e077454. doi: 10.1136/bmjopen-2023-077454 (PMC10668177; doi:10.1136/bmjopen-2023-077454), 2023-11-21
Supplement: bmjopen-2023-077454.draft_revisions.pdf [file bmjopen-2023-077454.draft_revisions.pdf]

# BMJ Open

BMJ Open is committed to open peer review. As part of this commitment we make the peer review history of every article we publish publicly available.

When an article is published we post the peer reviewers' comments and the authors' responses online. We also post the versions of the paper that were used during peer review. These are the versions that the peer review comments apply to.

The versions of the paper that follow are the versions that were submitted during the peer review process. They are not the versions of record or the final published versions. They should not be cited or distributed as the published version of this manuscript.

BMJ Open is an open access journal and the full, final, typeset and author-corrected version of record of the manuscript is available on our site with no access controls, subscription charges or pay-per-view fees (<http://bmjopen.bmj.com>).

If you have any questions on BMJ Open's open peer review process please email [info.bmjopen@bmj.com](mailto:info.bmjopen@bmj.com)

# BMJ Open

## Initial prescriptions and medication switches of biological products: an analysis of prescription pathways and determinants in the Swiss healthcare setting

|                               |                                                                                                                                                                                                                                                                                                                                           |
|-------------------------------|-------------------------------------------------------------------------------------------------------------------------------------------------------------------------------------------------------------------------------------------------------------------------------------------------------------------------------------------|
| Journal:                      | <i>BMJ Open</i>                                                                                                                                                                                                                                                                                                                           |
| Manuscript ID                 | bmjopen-2023-077454                                                                                                                                                                                                                                                                                                                       |
| Article Type:                 | Original research                                                                                                                                                                                                                                                                                                                         |
| Date Submitted by the Author: | 05-Jul-2023                                                                                                                                                                                                                                                                                                                               |
| Complete List of Authors:     | Wirth, Kevin; Helsana Versicherungen AG,<br>Boes, Stefan; University of Lucerne, Department of Health Sciences and Medicine<br>Näpflin, Markus; Helsana Group, Department of Health Sciences<br>Huber, Carola; Helsana Health Insurance Co, ; University Hospital Zurich,<br>Blozik, Eva; University of Zurich, Institute of Primary Care |
| Keywords:                     | PUBLIC HEALTH, Health Literacy, MEDICAL EDUCATION & TRAINING                                                                                                                                                                                                                                                                              |
|                               |                                                                                                                                                                                                                                                                                                                                           |

SCHOLARONE™  
Manuscripts

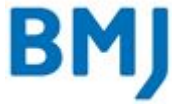

I, the Submitting Author has the right to grant and does grant on behalf of all authors of the Work (as defined in the below author licence), an exclusive licence and/or a non-exclusive licence for contributions from authors who are: i) UK Crown employees; ii) where BMJ has agreed a CC-BY licence shall apply, and/or iii) in accordance with the terms applicable for US Federal Government officers or employees acting as part of their official duties; on a worldwide, perpetual, irrevocable, royalty-free basis to BMJ Publishing Group Ltd ("BMJ") its licensees and where the relevant Journal is co-owned by BMJ to the co-owners of the Journal, to publish the Work in this journal and any other BMJ products and to exploit all rights, as set out in our [licence](#).

The Submitting Author accepts and understands that any supply made under these terms is made by BMJ to the Submitting Author unless you are acting as an employee on behalf of your employer or a postgraduate student of an affiliated institution which is paying any applicable article publishing charge ("APC") for Open Access articles. Where the Submitting Author wishes to make the Work available on an Open Access basis (and intends to pay the relevant APC), the terms of reuse of such Open Access shall be governed by a Creative Commons licence – details of these licences and which [Creative Commons](#) licence will apply to this Work are set out in our licence referred to above.

Other than as permitted in any relevant BMJ Author's Self Archiving Policies, I confirm this Work has not been accepted for publication elsewhere, is not being considered for publication elsewhere and does not duplicate material already published. I confirm all authors consent to publication of this Work and authorise the granting of this licence.

1  
2  
3  
4  
5  
6  
7  
8  
9  
10 1 **Initial prescriptions and medication switches of biological products: an analysis of**  
11  
12 2 **prescription pathways and determinants in the Swiss healthcare setting**  
13  
14  
15  
16

17 3 Kevin Wirth<sup>1,2\*</sup>, Stefan Boes<sup>2</sup>, Markus Näpflin<sup>1</sup>, Carola A. Huber<sup>1,3</sup>, Eva Blozik<sup>3</sup>  
18  
19  
20  
21  
22

23  
24 4 <sup>1</sup> Department of Health Sciences, Helsana Group, Zurich, Switzerland  
25

26 5 <sup>2</sup> Department of Health Sciences and Medicine, University of Lucerne, Lucerne, Switzerland  
27

28 6 <sup>3</sup> Institute of Primary Care, University of Zurich, Zurich, Switzerland  
29  
30  
31  
32  
33

34 7 \* Corresponding author  
35

36 8 Kevin Wirth, Südstrasse 29, 8180 Bülach, [kevin.wirth.migliazza@gmail.com](mailto:kevin.wirth.migliazza@gmail.com)  
37  
38  
39  
40

41 9 Word count: 3'943  
42  
43  
44  
45  
46  
47  
48  
49  
50  
51  
52  
53  
54  
55  
56  
57  
58  
59  
60

1  
2  
3 10 **ABSTRACT**

4 11 **Objectives** Biological products have contributed to extraordinary advances in disease  
5  
6  
7 12 treatments over the last decade. However, the cost-saving potential of imitator products, so-  
8  
9 13 called biosimilars, is still underresearched in Switzerland. This study aims to assess biosimilars'  
10  
11 14 prescriptions at treatment initiation and their determinants, as well as biological therapy  
12  
13 15 switches.

16 16 **Design** We analyzed longitudinal data for biosimilar prescriptions in Switzerland using  
17  
18 17 descriptive statistics and logistic regression to quantify the associations with individual,  
19  
20 18 pharmaceutical, and provider-related variables.

21 19 **Setting** The analysis is based on de-identified claims data of patients with mandatory health  
22  
23 20 insurance at Helsana, a leading Swiss health insurance.

24  
25 21 **Participants** Overall, 17'654 patients receiving at least one biological product between 2016  
26  
27 22 and 2021 were identified.

28  
29 23 **Primary and secondary outcome measures:** We differentiated between initial prescriptions  
30  
31 24 and follow-up prescriptions. Our regression focused on initial prescriptions due to evidence  
32  
33 25 indicating that patients tend to follow the medication prescribed at therapy initiation.

34  
35 26 **Results** Although biosimilars market share was low (28.6%), the number of prescriptions has  
36  
37 27 increased. Few medication switches were detected. Increased relative price difference was  
38  
39 28 associated with decreased probability of biosimilar prescriptions, whereas male sex, an increase  
40  
41 29 of available imitator drugs on the market and, larger packaging sizes, and prescriptions from  
42  
43 30 specialists or physicians in outpatient settings were associated with increased biosimilars use.

44  
45 31 **Conclusion** The low number of biosimilar prescriptions despite the proliferating biosimilar  
46  
47 32 market indicates a high potential for biosimilar diffusion. Our research highlights the need for  
48  
49 33 awareness initiatives to improve understanding among patients and physicians, enabling  
50  
51 34 informed, shared decision-making about biosimilar prescriptions.

52  
53  
54  
55  
56  
57  
58  
59 35 [249 of max 250 words]

1  
2  
3  
4  
5 36 **Key words:** biosimilars, biologics, reference products, switches, initial prescription  
6  
7  
8  
9

## 10 **ARTICLE SUMMARY**

### 11 12 37 **Strengths and limitations of this study:**

- 13  
14 38 • First scientific study to evaluate the prescription of biosimilars using a comprehensive  
15  
16 39 set of sociodemographic, pharmaceutical, and healthcare provider variables  
17  
18 40 representing a nearly representative database in Switzerland.
- 21 41 • This research paper is the first to divide the medication treatment pathway into initial  
22  
23 42 and follow-up prescriptions, with a specific focus on the initial prescriptions. This is  
24  
25 43 particularly relevant, as initial prescriptions often influence subsequent prescribing  
26  
27 44 decisions as patients are less willing to switch biological medication therapy.
- 30 45 • This study was the first to assess determinants of initial prescriptions in the context of  
31  
32 46 biosimilars.
- 33 47 • Some demand-related factors (patients' health status, beliefs, and experiences) and  
34  
35 48 supply-related factors (physicians' incentives and beliefs) about biosimilars could not  
36  
37 49 be accounted using the claims data.

## 40 41 42 43 44 50 **BACKGROUND**

45  
46  
47 51 Biological products increased the spectrum of available treatment options considerably in the  
48  
49 52 treatment of many cancers and autoimmune diseases. However, these medications are more  
50  
51 53 expensive compared to many conventional synthetic drugs as they are produced by living cells  
52  
53 54 and, thus, require a more complex manufacturing process. Currently, there are a considerable  
54  
55 55 number of biologics in the final stages of development and approval [1, 2]. The healthcare  
56  
57 56 systems are likely to incur substantial costs even if just a small proportion of these biologics is

1  
2  
3 57 granted market approval. One lever to curb rising drug costs is the replacement of biologics  
4  
5 58 after patent expiration with less expensive imitator products, also known as biosimilars. Due to  
6  
7 59 the biotechnological manufacturing process, exact copies of the biological products are not  
8  
9 60 achievable. As a result, minor structural deviations in the biosimilar are unavoidable [3, 4], and  
10  
11 61 regulatory authorities accept them for market approval [5, 6].  
12  
13

14 62 In Switzerland, a Swiss report has estimated a cost saving potential of over 60 million Swiss  
15  
16 63 francs for the complete replacement of reference products with biosimilars in 2019 [7]. In the  
17  
18 64 coming years, cost saving potential will increase as several top-selling biologics will lose their  
19  
20 65 patent protection in Switzerland [7, 8] and corresponding biosimilars have already been  
21  
22 66 approved in the European Union (EU) [2, 9, 10]. However, the realization of the cost saving  
23  
24 67 potential us is assumed to be curbed because of skepticism about biosimilars from both the  
25  
26 68 patient and physician side [11–14]. At the same time, patients and their health care providers  
27  
28 69 seem to be less willing to switch biological products when therapy has already been started  
29  
30 70 [15]. Consequently, the choice of initial prescription (IP) at therapy initiation is the decisive  
31  
32 71 factor for following medication prescriptions. Despite the significant role of IP in shaping  
33  
34 72 subsequent treatment pathways, research on the prescription behavior of biological products at  
35  
36 73 therapy initiation and the impact of IP is limited. Existing studies have only demonstrated that  
37  
38 74 patients tend to remain on their initial biological treatment product once medication treatment  
39  
40 75 has been initiated. Thus, there is a need for further investigation into the influencing factors of  
41  
42 76 IP and their influence on the choice of medication path. Thus, this study aims to assess  
43  
44 77 biosimilars' prescriptions at treatment initiation and their determinants, as well as biological  
45  
46 78 therapy switches.  
47  
48  
49  
50  
51  
52  
53  
54  
55  
56  
57  
58  
59  
60

## 79 **METHODS**

### 80 **Study design and study population**

81 We analyzed administrative claims data from adult patients ( $\geq 18$  years) enrolled in mandatory  
82 health insurance at Helsana Group, a leading health insurance provider in Switzerland, and who  
83 had at least one biological product claim between 2016 and 2021 (Table A1). The Helsana  
84 database covers 15% of the Swiss population (1.2 million Swiss residents). Previous studies  
85 have shown that this database can be considered fairly representative of the Swiss general  
86 population, as the results showed only minor discrepancies between raw and adjusted results  
87 [16, 17].

88 In Switzerland, medication reimbursement is governed by the Federal Law on Health Insurance,  
89 which mandates that basic health insurance must cover the costs of essential medications.  
90 Swissmedic regulates the market entry of medications, while the Federal Office of Public  
91 Health oversees the establishment of the reimbursement list, which determines the extent to  
92 which a medication is reimbursed. Switzerland's medication reimbursement system aims to  
93 balance access to essential medications with cost control: To be eligible for reimbursement,  
94 medications must demonstrate efficacy, safety, and cost-effectiveness compared to standard  
95 treatments. As such, all of the biological products included in this study are presumed to have  
96 fulfilled these requirements.

97 The study population for this research consisted of a total of 68'310 individuals who had at least  
98 one prescription of a biological or biosimilar medication between the years 2016 and 2021.  
99 Among this population, there were 53'379 individuals who had full mandatory health insurance  
100 coverage during the observation period. Furthermore, within this group, there were 17'654  
101 individuals (or 18'953 IPs, respectively) who specifically received biological medications for  
102 which a biosimilar alternative was available at the time of dispensing.



### 103 **Measures**

104 The study included all patients who had at least one biosimilar available on the market at the  
105 time of IP of a biologic product. IP were defined for each patient as claims that were not  
106 preceded by other prescriptions in the same medication category within the previous 24 months.  
107 The following prescriptions were labeled as “follow-up prescriptions” (FP). We considered all  
108 claims of biological products within 12 months after IP. By restricting the follow-up period to  
109 12 months, we were able to focus on the medications that were prescribed as a result of the  
110 initial prescription rather than medications that were prescribed for unrelated reasons. This  
111 approach allowed us to evaluate the impact of the initial prescription more accurately on  
112 subsequent medication use, and to draw meaningful conclusions about prescribing patterns over  
113 time. We selected 117 biological products approved by Swissmedic from a list (Table A1)  
114 derived from the Swiss Drug Compendium that details all unique reference products and the  
115 corresponding imitator medications (based on matching, unique combinations of active  
116 ingredient, dose, and package size). We considered patient characteristics as covariates. They  
117 included sex, age group (<50, 50-64, 65-74, >74) and language region (German, French,  
118 Italian). Furthermore, information on comorbidity was assessed using the number of  
119 Pharmaceutical Cost Groups (PCG) per patient (0,1,2,>2). This metric serves as a proxy for the  
120 presence of chronic disease [18]. The Swiss healthcare system offers different cost-sharing  
121 options to patients, including low (CHF 500, 1'000) or high deductibles (i.e., CHF 1'500, 2'000,  
122 or 2'500), and integrated care models, which aim to improve patient outcomes and reduce  
123 healthcare costs by coordinating care across different healthcare providers and settings. In  
124 Switzerland, patients who participate in integrated care models receive a premium rebate in  
125 exchange for limited healthcare provider options. Thus, having a low (CHF 500, 1'000) or high  
126 deductible (i.e., CHF 1'500, 2'000, or 2'500 vs. CHF 300), and being enrolled in a managed  
127 care model were used in the analysis. A comprehensive set of variables characterized the

1  
2  
3 128 prescribed medications: Prescriptions were described by category (fusion proteins, hormones,  
4  
5 129 monoclonal antibodies, low-molecular-weight [LMW] heparins and growth factors), whether  
6  
7 130 there were multiple packaging sizes, the cost per package of the reference product (in CHF,  
8  
9 131 100, 100-599, >600) and the relative price difference of the reference product to the  
10  
11 132 corresponding biosimilar (10, 10-19, >20). We also assessed the number of available imitator  
12  
13 133 drugs (1, 2, >2) on the market at the date of prescription. The analysis adds the aspect of  
14  
15 134 healthcare provider by including information on the supply channel (general practitioner,  
16  
17 135 outpatient hospital, specialist, traditional pharmacy).  
18  
19  
20  
21 136 Since biological products are the focus of our analysis and they include various subgroups, it  
22  
23 137 seems appropriate to address the wording of these medications to ensure consistent  
24  
25 138 terminology: Throughout the manuscript, we refer to the totality of all biologically  
26  
27 139 manufactured drugs by using the term "biological products", while the originator drugs are  
28  
29 140 referred to as "biologics" or as "reference products". "Biosimilars" are the imitator drugs of  
30  
31 141 reference products.  
32  
33  
34  
35  
36

## 37 142 **Statistical analysis**

38  
39  
40 143 All research participants' baseline characteristics are shown as counts and percentages, or as  
41  
42 144 mean and standard deviation for continuous variables. We compared patient characteristics for  
43  
44 145 all individuals with and without biosimilar IP. For bivariate comparisons between patients with  
45  
46 146 and without biosimilar IP, Fisher exact and Chi-Square tests were used accordingly. Statistical  
47  
48 147 significance was defined as a two-sided p-value of 0.05. We determined the biosimilar  
49  
50 148 prevalence by distinguishing between IP and FP and the prevalence of biological therapy  
51  
52 149 switches (number of prescriptions and patients) for each year (2016-2021). Chi-squared tests  
53  
54 150 were used to determine whether the prevalence was equivalent across the years. To assess the  
55  
56 151 determinants of biosimilar prescriptions, we used logistic regression models in which the  
57  
58  
59  
60

1  
2  
3 152 dependent variable was whether a biosimilar was prescribed as IP (0 or 1). Three different  
4  
5 153 logistic models with different sets of variables were computed (Table A8). Both, Model B and  
6  
7  
8 154 C, show similar results and a better fit of the estimates compared to Model A based on the  
9  
10 155 goodness-of-fit criteria (AIC, BIC). For the manuscript, we proceed with Model C because we  
11  
12 156 are mainly interested in the associations with biosimilar prescriptions from all three points of  
13  
14  
15 157 view (patient, medication, physician). Odds ratios (OR) and corresponding 95% confidence  
16  
17 158 intervals (CI) were calculated for each regression coefficient. The success rate in the binomial  
18  
19 159 model was denoted by the term "occurrence" to improve the results' readability. All analyses  
20  
21 160 were performed using R version 4.2.1.

## 26 161 RESULTS

29 162 The study sample consisted of 18'953 patients with at least one prescription of biological  
30  
31 163 products. Patient characteristics of the study population at the time of IP, stratified by type of  
32  
33 164 IP (reference product 81.5%, biosimilar 18.5%), are presented in Table 1. Female patients more  
34  
35 165 frequently received biosimilars than males (60.6%). The mean age was slightly higher in men  
36  
37 166 (61.7 years) compared to women (59.0 years). LMW heparins were the most prescribed  
38  
39 167 reference products (54.2%), with growth hormones constituting the largest group of biosimilars  
40  
41 168 (57.9%).

46 **Table 1. Comparison of patient characteristics at IP between patients with reference**  
47 **product and biosimilar as IP.**

| Variables, n (%) | Total          | Patients with<br>IP = Reference<br>product | Patients with<br>IP = Biosimilar | p-value |
|------------------|----------------|--------------------------------------------|----------------------------------|---------|
| Observations     | 18'953         | 15'453 (81.5%)                             | 3'500 (18.5%)                    |         |
| Female sex       | 11'678 (61.6%) | 9'558 (61.9%)                              | 2'120 (60.6%)                    | 1       |
| Age group        |                |                                            |                                  | *** 2   |
| <50              | 5'501 (29.0%)  | 4'613 (29.9%)                              | 888 (25.4%)                      |         |
| 50-64            | 4'720 (24.9%)  | 3'764 (24.4%)                              | 956 (27.3%)                      |         |
| 65-74            | 3'963 (20.9%)  | 3'001 (19.4%)                              | 962 (27.5%)                      |         |
| >74              | 4'769 (25.2%)  | 4'075 (26.4%)                              | 694 (19.8%)                      |         |
| Language region  |                |                                            |                                  | *** 2   |

|                                                |                |                |               |       |
|------------------------------------------------|----------------|----------------|---------------|-------|
| German                                         | 12'719 (67.1%) | 9'958 (64.4%)  | 2'761 (78.9%) |       |
| French                                         | 4'324 (22.8%)  | 3'777 (24.4%)  | 547 (15.6%)   |       |
| Italian                                        | 1'910 (10.1%)  | 1'718 (11.1%)  | 192 (5.5%)    |       |
| Number of comorbidities                        |                |                |               | ** 2  |
| 0                                              | 4'738 (25.0%)  | 3'901 (25.2%)  | 837 (23.9%)   |       |
| 1                                              | 3'295 (17.4%)  | 2'664 (17.2%)  | 631 (18.0%)   |       |
| 2                                              | 3'072 (16.2%)  | 2'448 (15.8%)  | 624 (17.8%)   |       |
| >2                                             | 7'848 (41.4%)  | 6'440 (41.7%)  | 1'408 (40.2%) |       |
| Deductible                                     |                |                |               | *** 2 |
| Low                                            | 15'765 (83.2%) | 12'846 (83.1%) | 2'919 (83.4%) |       |
| Managed care                                   | 11'921 (62.9%) | 9'790 (63.4%)  | 2'131 (60.9%) | ** 1  |
| Category                                       |                |                |               | *** 2 |
| Fusion proteins                                | 360 (1.9%)     | 178 (1.2%)     | 182 (5.2%)    |       |
| Hormones                                       | 2'112 (11.1%)  | 1'697 (11.0%)  | 415 (11.9%)   |       |
| Monoclonal antibodies                          | 2'908 (15.3%)  | 2'107 (13.6%)  | 801 (22.9%)   |       |
| LMW heparins                                   | 10'272 (54.2%) | 10'196 (66.0%) | 76 (2.2%)     |       |
| Growth factors                                 | 3'301 (17.4%)  | 1'275 (8.3%)   | 2'026 (57.9%) |       |
| Multiple package size                          | 16'432 (86.7%) | 13'532 (87.6%) | 2'900 (82.9%) | *** 2 |
| Cost per package of reference product (in CHF) |                |                |               | *** 2 |
| <100                                           | 9'866 (52.1%)  | 9'652 (62.5%)  | 214 (6.1%)    |       |
| 100-599                                        | 5'066 (26.7%)  | 3'179 (20.6%)  | 1'887 (53.9%) |       |
| >600                                           | 4'021 (21.2%)  | 2'622 (17.0%)  | 1'399 (40.0%) |       |
| Relative price difference (%)                  |                |                |               | *** 2 |
| <10                                            | 13'807 (72.8%) | 11'546 (74.7%) | 2'261 (64.6%) |       |
| 10-19                                          | 2'386 (12.6%)  | 1'871 (12.1%)  | 515 (14.7%)   |       |
| >20                                            | 2'760 (14.6%)  | 2'036 (13.2%)  | 724 (20.7%)   |       |
| Number of available imitator drugs             |                |                |               | *** 2 |
| 0                                              | -              | -              | -             |       |
| 1                                              | 12'490 (65.9%) | 12'012 (77.7%) | 478 (13.7%)   |       |
| 2                                              | 2'741 (14.5%)  | 1'911 (12.4%)  | 830 (23.7%)   |       |
| >2                                             | 3'722 (19.6%)  | 1'530 (9.9%)   | 2'192 (62.6%) |       |
| supply channel of first prescription           |                |                |               | *** 2 |
| General practitioner                           | 1'185 (6.3%)   | 1'097 (7.1%)   | 88 (2.5%)     |       |
| Outpatient hospital                            | 6'224 (32.8%)  | 4'359 (28.2%)  | 1'865 (53.3%) |       |
| Specialist                                     | 3'606 (19.0%)  | 2'674 (17.3%)  | 932 (26.6%)   |       |
| Traditional pharmacy                           | 7'564 (39.9%)  | 6'981 (45.2%)  | 583 (16.7%)   |       |
| Rest                                           | 374 (2.0%)     | 342 (2.2%)     | 32 (0.9%)     |       |

<sup>1</sup>) Fisher exact test, <sup>2</sup>) Chi-Square test

Signif. codes: '\*\*\*' 0.001

169 The study found that a total of 17'654 patients were prescribed at least one biological product,  
 170 with 56.9% of them (10'046 patients) receiving multiple prescriptions. Only 20.3% (3'600  
 171 patients) of those receiving biological products were prescribed at least one biosimilar during

172 the observation period. Among the patients who were prescribed biosimilars, 15.1% (2'672  
 173 patients) received multiple biosimilars.

174 Table 2 describes the overall frequency of biologicals products over the observation period  
 175 including the absolute and relative frequency of biosimilars in comparison to all biological  
 176 prescriptions. Of all biological products (IP and FP), 28.6% were biosimilar prescriptions. In  
 177 absolute values, the prescription rate of biosimilars increased over time (from 1'016 in 2016 to  
 178 6'976 in 2021). However, there is no discernible trend in the relative share of biosimilars in all  
 179 prescriptions of biological products (35.5% in 2016, 39.2% in 2017, 45.2% in 2018, 41.6% in  
 180 2019, 26.3% in 2020 and 22.5% in 2021). Furthermore, the share of biosimilars in FPs was  
 181 higher than in IPs in every year. The growth factor Filgrastim was the most frequently prescribed  
 182 active substance of biosimilars in IPs and FPs (53.1% and 36.2% respectively), while  
 183 enoxaparin was the most frequently prescribed active substance of reference products in IPs  
 184 and FPs (65.3% and 25.5%, respectively) (Table A2-A6).

**Table 2. All prescriptions for which a biosimilar was approved at the time of the prescription**

|                         | total          | 2016        | 2017          | 2018          | 2019          | 2020          | 2021          |       |
|-------------------------|----------------|-------------|---------------|---------------|---------------|---------------|---------------|-------|
| n                       | 18'953         | 815         | 888           | 1'037         | 1'520         | 5'313         | 9'380         |       |
| Biosimilars (n, % of N) | 3'500 (18.5%)  | 262 (32.1%) | 343 (38.6%)   | 391 (37.7%)   | 612 (40.3%)   | 813 (15.3%)   | 1'079 (11.5%) | *** 1 |
| n                       | 50'251         | 2'047       | 2'716         | 3'314         | 6'306         | 14'288        | 21'580        |       |
| Biosimilar (n, % of N)  | 16'293 (32.4%) | 754 (36.8%) | 1'071 (39.4%) | 1'578 (47.6%) | 2'644 (41.9%) | 4'349 (30.4%) | 5'897 (27.3%) | *** 1 |

Chi-Square test, Signif. codes: '\*\*\*' <0.001

185 Of the study population, only a small subset (n=1'492, 8.5%) experienced at least one  
 186 medication switch (Table 3). Most patients had switches between reference products (n=867,  
 187 58.1%), followed by switches from reference product to biosimilar (n=331, 22.2%), from  
 188 biosimilar to reference product (n=297, 19.9%) and switches between biosimilars (n=286,

189 19.2%). The number of patients with at least one switch increased between 2016 and 2021  
 190 (from 28 to 662), whereby the numbers of patients with switches between reference products  
 191 increased most prominently (from 25.0% in 2016 to 62.1% in 2021). Switches between  
 192 reference products and between biosimilars occurred most often for Enoxaparin and Rituximab,  
 193 respectively (Table A7). The most common switches from reference product to biosimilar and  
 194 from biosimilar to reference products were most often observed for Filgrastim and Enoxaparin.

**Table 3. Patients with biologic therapy switches**

| Switches, n=patients                    | Total       | 2016       | 2017       | 2018       | 2019        | 2020        | 2021        | p-value |
|-----------------------------------------|-------------|------------|------------|------------|-------------|-------------|-------------|---------|
| At least one, n                         | 1'492       | 28         | 42         | 77         | 249         | 434         | 662         |         |
| Reference Prod to Reference Prod, n (%) | 867 (58.1%) | 7 (25.0%)  | 15 (35.7%) | 37 (48.1%) | 146 (58.6%) | 251 (57.8%) | 411 (62.1%) | ***1    |
| Biosimilar to Biosimilar, n (%)         | 286 (19.2%) | 9 (32.1%)  | 10 (23.8%) | 14 (18.2%) | 51 (20.5%)  | 74 (17.1%)  | 128 (19.3%) | 1       |
| Reference Prod to Biosimilar, n (%)     | 331 (22.2%) | 6 (21.4%)  | 11 (26.2%) | 21 (27.3%) | 60 (24.1%)  | 103 (23.7%) | 130 (19.6%) | 1       |
| Biosimilar to Reference Prod, n (%)     | 297 (19.9%) | 10 (35.7%) | 8 (19.0%)  | 15 (19.5%) | 49 (19.7%)  | 96 (22.1%)  | 119 (18.0%) | 1       |

Chi-Square test  
 Signif. codes: '\*\*\*' <0.001

195 As far as the regression results are concerned, the odds of prescribing biosimilars at IP have  
 196 been increasing over the years (Fig.1, Table A8). Male sex was associated with 13.2% higher  
 197 odds of receiving biosimilar IP, whereas residence in a French or Italian-speaking region had a  
 198 38.9% and 23.9%, respectively, lower occurrence of a biosimilar IP. None of the insurance-  
 199 related variables showed a significant association with biosimilars IPs. In terms of  
 200 pharmaceutical variables, monoclonal antibodies, LMW heparins and growth factors were  
 201 associated with substantially lower biosimilar IP occurrences (-88.5%, -99.9% and -84.2%)  
 202 than fusion proteins. The availability of multiple packaging sizes was associated with 4.6-fold  
 203 higher odds of biosimilar IP compared to medications with solely one packaging size. For the  
 204 absolute package price, no consistent pattern was observed, as medications with prices between

1  
2  
3 205 100 and 599 francs per pack decreased the odds by 79.8% compared to the baseline (<100  
4  
5 206 CHF), whereas the odds in the highest prize category (>600 CHF) were lower by 34.3%.  
6  
7 207 However, compared to products with a <10% price difference between reference product and  
8  
9 208 biosimilar, higher price reductions were associated with decreased occurrence of biosimilar IP:  
10  
11 209 medications with 10-19% price difference had 92.4% lower odds and medications with more  
12  
13 210 than 20% had even 93.3% lower odds. On the contrary, increasing the number of available  
14  
15 211 imitator medications of prescription (2 and >2) had substantially higher (2.36-fold and 9.65-  
16  
17 212 fold) odds of biosimilar IP compared to prescriptions with only one available biosimilar. As far  
18  
19 213 as provider variables are concerned, physicians in the outpatient hospital setting prescribed far  
20  
21 214 more biosimilars compared to general practitioners (2.48-fold higher odds). The occurrence of  
22  
23 215 biosimilar IP was also 41.7% higher in patients who had been prescribed biological products  
24  
25 216 by a specialist than in patients who had received the equivalent medications from a general  
26  
27 217 practitioner.  
28  
29  
30  
31  
32  
33  
34

## 35 218 **DISCUSSION**

36  
37  
38 219 The growing market for biosimilars can explain the observed increase in the number of  
39  
40 220 biosimilar prescriptions over time: from 15 approved biosimilars in 2016 the market for  
41  
42 221 biosimilars has grown (15 in 2017; 22 in 2018; 42 in 2019; 70 in 2020) up to 78 biosimilars in  
43  
44 222 2021 (Table A1) [7, 19]. A longer time on the market gives the biosimilar a better chance to  
45  
46 223 establish itself and gain market share. Despite the increase, the biosimilars quota remained  
47  
48 224 relatively low. In the literature, this low share in Switzerland has already been documented: in  
49  
50 225 2019, market sales of all biological products with available biosimilars totaled CHF 449 million  
51  
52 226 in 2019, of which biosimilars accounted for only CHF 42 million (9.4%) [7]. Furthermore,  
53  
54 227 market share of biosimilars seems to be low compared to other countries. For example,  
55  
56 228 biosimilars account for 80% of the biological product market in Norway [20]. In Germany, two  
57  
58  
59  
60

1  
2  
3 229 studies reported an average biosimilar ratio between 40.5% and 51.9% in 2019 [21, 22]. In the  
4  
5 230 present study we observed substantially lower average biosimilar quota of 28.0%. Infiximab is  
6  
7 231 a particularly compelling example, with the biosimilar share reaching 26% in Germany after  
8  
9 232 only 12 months on the market (2017) and rising to 64-68% of the biosimilar market in 2019.  
10  
11 233 By contrast, infiximab achieved a market share of only 22% in Switzerland in 2019 [7]. The  
12  
13 234 low market share of biosimilars in Switzerland may be due to various reasons: Studies have  
14  
15 235 shown that knowledge deficits among physicians and among patients may lead to reluctance  
16  
17 236 regarding the use of biosimilars [11–14]. According to survey studies [23–27], between 15-  
18  
19 237 30% of the population is thought to have a negative perception of these imitator drugs. This  
20  
21 238 distrust may be driven by a perceived weakness in the evidence base concerning efficacy and  
22  
23 239 safety of biosimilars, as only bioequivalence needs to be demonstrated for biosimilar approval.  
24  
25 240 However, there is increasing evidence of equivalent safety and efficacy of biosimilars, along  
26  
27 241 with evidence of bioequivalence [28–30]. Furthermore, a challenge for newly approved  
28  
29 242 biosimilars is the difficulty in extending conclusions from RCTs to the broader population that  
30  
31 243 will use the biosimilar. This is because RCTs typically enroll a more homogeneous population,  
32  
33 244 and certain patient groups, such as pediatric, elderly, and comorbid populations, as well as  
34  
35 245 patients with polypharmacy, are often underrepresented in these trials [31–33]. As a result,  
36  
37 246 prescribers may be skeptical about the use of biosimilars in these patient populations because  
38  
39 247 of the lack of data. Moreover, the current incentive system discourages the prescription of  
40  
41 248 biosimilars for self-dispensing doctors and pharmacies as they are rewarded for prescribing the  
42  
43 249 more expensive product by a bigger profit margin [7]. On the other side, under a capitation  
44  
45 250 payment model, managed care physicians may have a financial incentive to prescribe lower-  
46  
47 251 cost biosimilars in order to maximize profits. However, if physicians are not properly educated  
48  
49 252 about the safety and efficacy of biosimilars, they may be hesitant to prescribe them.  
50  
51  
52  
53  
54  
55  
56  
57  
58  
59  
60



1  
2  
3 253 That only a small subset (n=1'492, 8.5%) experienced at least one medication switch can be  
4  
5 254 explained by the reluctance of patients to switch to a biosimilar medication due to the fear of  
6  
7 255 experiencing new and unknown side effects. Patients who have been using a particular  
8  
9 256 medication for a long time and have become accustomed to its efficacy and safety profile may  
10  
11 257 be hesitant to switch to a biosimilar, which they perceive as being different and possibly  
12  
13 258 inferior. Nevertheless, efficacy of biosimilar switching has been observed [7, 28–30, 34, 35].  
14  
15 259 According to a systematic literature review based on 90 published studies, the great majority of  
16  
17 260 the publications did not report differences in immunogenicity, safety, or efficacy when patients  
18  
19 261 switched to biosimilars. Three large studies did not show differences in efficacy or safety after  
20  
21 262 multiple switches between reference product and biosimilar [36–38]. Only two publications  
22  
23 263 reported a loss of efficacy or increased dropout rates [39, 40]. Often, this very knowledge and  
24  
25 264 awareness about the safety and efficacy of switching to new treatment options lack for  
26  
27 265 prescribing physicians who rely on solid, evidence-based data to make treatment decisions [41–  
28  
29 266 43].  
30  
31 267 The regression results revealed that biosimilar IP rates were lower in French-speaking cantons.  
32  
33 268 These regional variations may be caused by a variety of variables, including a higher  
34  
35 269 concentration of medical services in urban regions, various patient characteristics, and cultural  
36  
37 270 variations between cantons [44, 45]. The strongest barrier for biosimilar prescriptions was the  
38  
39 271 increasing relative price difference between biosimilar and reference product. A possible  
40  
41 272 explanation is that healthcare providers may have less experience with biosimilars with a higher  
42  
43 273 price difference or may perceive them as less established and less proven than biosimilars with  
44  
45 274 a lower price difference. This lack of familiarity or perceived risk may contribute to reluctance  
46  
47 275 in prescribing biosimilars with a higher price difference. It is also important to consider the role  
48  
49 276 of financial incentives and reimbursement policies in biosimilar prescribing: Currently,  
50  
51 277 dispensation channels receive a larger profit margin when distributing the more expensive  
52  
53  
54  
55  
56  
57  
58  
59  
60

1  
2  
3 278 reference product under the present price-dependent margin [19]. This incentive system seems  
4  
5 279 to be characteristic for Switzerland, as studies conducted in European countries did not find a  
6  
7 280 relationship between price difference and biosimilar dissemination [46–48]. This might be  
8  
9 281 attributed to several factors that differentiate Switzerland from other European countries:  
10  
11 282 Cantonal differences in self-dispensing regulation, the country's different prescribing cultures  
12  
13 283 and guidelines across its language regions, and capitation is implemented only in relatively few  
14  
15 284 cases in Switzerland. In our analysis, male patients had more biosimilar IP. According to  
16  
17 285 studies, women were often more skeptical of imitator drugs [23, 49–52] and they more  
18  
19 286 frequently believe that they are more responsive to medications than men [53–55]. This can  
20  
21 287 have an impact on their confidence in biosimilars, making female patients more aware of  
22  
23 288 potential side effects or lack thereof. Biosimilar IPs were prescribed more frequently for fusion  
24  
25 289 proteins compared to other categories which indicates an increased acceptance of imitator  
26  
27 290 products in this drug class. This is supported by the relatively early market entry (2018) and by  
28  
29 291 a meta-analysis showing comparable results in terms of efficacy and safety between reference  
30  
31 292 product and biosimilars [56]. The strongest facilitator of biosimilar prescriptions was the  
32  
33 293 amount of available biosimilars, which is in line with the findings of a prior study [46, 57].  
34  
35 294 Thus, the replacement of reference products by biosimilars seems to be better accepted in  
36  
37 295 market segments with many imitator products. This finding is probably associated with the  
38  
39 296 larger collective promotional effort from multiple players involved in the field to favor  
40  
41 297 biosimilars; it is noteworthy that the largest adoption of biosimilars (Filgrastim) has been  
42  
43 298 partially attributable to the fact that numerous biosimilar producers have commercialized  
44  
45 299 different products, whereas there is only one company branding the reference product [58]. We  
46  
47 300 found more biosimilar IPs for specialists and outpatient hospital physicians than GP. These  
48  
49 301 findings are in line with existing literature that showed more biosimilars from specialists who  
50  
51 302 reported a higher confidence in the comparability of biosimilars than GPs [59, 60]. Differences  
52  
53  
54  
55  
56  
57  
58  
59  
60

1  
2  
3 303 in care providers may be due to a variety of reasons: some healthcare providers may not be  
4  
5 304 interested in stockpiling too many different medications and additional biosimilars, as they  
6  
7  
8 305 sometimes have large storage requirements (cooling, expiration date) and , thus, are associated  
9  
10 306 with a significant financial risk [19]. In addition, it has been demonstrated that the dissemination  
11  
12 307 of knowledge about new prescription options is heterogeneous because there are large learning  
13  
14 308 costs associated with the treatment effects of new therapy options, which rely on the training  
15  
16 309 and experience of the doctor [61]. Despite the fact that a previous study conducted in the context  
17  
18 310 of generic drugs showed that older people are less likely to use imitator products when offered  
19  
20 311 a choice [23, 57], we did not observe an age-dependency of biosimilar prescriptions.

23 312 The most valuable strength of this study is the extensive dataset of biosimilar prescriptions and  
24  
25 313 potential influencing factors including sociodemographic, pharmaceutical and healthcare  
26  
27 314 provider variables that were gathered from a representative sample of the Swiss population.

28  
29 315 The main limitation is the dearth of clinical data in our database (e.g., disease severity, clinical  
30  
31 316 diagnosis, and reason for biosimilar utilization). However, we attempted to mitigate this by  
32  
33 317 utilizing comorbidity measures based on reimbursed prescriptions to control for potential  
34  
35 318 confounders. Another limitation of our study is that the follow-up period for the prescriptions  
36  
37 319 was limited to 12 months. This time frame may have led to the exclusion of some prescriptions,  
38  
39 320 potentially introducing bias into our results. Nevertheless, we observed that a significant  
40  
41 321 number of patients (7'608, which accounts for 43.1% of the total) were given only one  
42  
43 322 prescription, indicating that any bias arising from this limitation is expected to be insignificant.

44  
45 323 The relatively low market share of biosimilars compared to other EU countries highlighted in  
46  
47 324 our research paper has important implications for the adoption and utilization of these  
48  
49 325 products in Switzerland. Patients and physicians should be better and objectively informed  
50  
51 326 about biosimilars in order to increase the acceptance [47, 48]. Also, for example, a clear and  
52  
53 327 conspicuous indication of the prescribed active substance on the medication package for both  
54  
55  
56  
57  
58  
59  
60

1  
2  
3 328 the reference product and the imitator drug, for instance, could enhance patient confidence  
4  
5 329 [42]. To address the perceived uncertainty and mistrust in imitator products, the evidence base  
6  
7 330 should be further strengthened: direct evidence to help explain some of the practical aspects  
8  
9 331 related to the use of biosimilars can be provided by retrospective studies, national databases  
10  
11 332 and registries that track the long-term immunogenicity and safety of biosimilars [62–67]. In  
12  
13 333 addition, the incentive system for healthcare providers seems to be designed in such a way  
14  
15 334 that fewer biosimilars are prescribed. Thus, these incentives should be eliminated, for  
16  
17 335 example by introducing a fixed margin that always remunerates the medication supplier the  
18  
19 336 same regardless of the prescribed product (reference product or biosimilar). In order to exploit  
20  
21 337 the cost saving potential of biosimilars, the aforementioned measures should be targeted to  
22  
23 338 biosimilars with a noticeable price difference compared to their reference products, and that  
24  
25 339 still possess relatively low biosimilar market share. Taking into account the findings  
26  
27 340 presented in Table A6, notable examples of these biosimilars include Bevacizumab,  
28  
29 341 Follitropin alfa, and Pegfilgrastim.  
30  
31  
32  
33 342 However, the decision to prescribe an imitator drug should not merely be motivated by the  
34  
35 343 cost-saving potential but should ensure appropriate health care provision for the patients.  
36  
37 344 Therefore, it is crucial for healthcare providers to engage in shared-decision making with their  
38  
39 345 patients to determine the most appropriate treatment option based on their individual medical  
40  
41 346 situation.  
42  
43  
44  
45  
46  
47  
48

## 347 **CONCLUSION**

348 Despite an increase of available biosimilars in Switzerland between 2016 and 2021, the  
349 biosimilars market share remained relatively low over time. In addition, biological therapy  
350 switches were rarely observed, highlighting the importance of IPs. Our study suggests that  
351 greater acceptance and higher utilization of biosimilars may be associated with the availability  
60

1  
2  
3 352 of different package sizes and lower price differences between biosimilars and their reference  
4  
5 353 products. Patients and providers should be informed about biosimilars in a timely and  
6  
7 354 appropriate manner, and outdated incentive structures have to be changed to increase the use of  
8  
9  
10 355 biosimilars.

11  
12 *[please insert Appendix here]*  
13  
14  
15  
16

17 356 **Funding** This research received no specific grant from any funding agency in the public,  
18  
19 357 commercial or not-for-profit sectors  
20  
21  
22

23  
24 358 **Competing interests** The authors declare that they have no conflicts of interest. Helsana Group  
25  
26 359 provided support in the form of salaries for authors (KM, MN, CH, EB), without having any  
27  
28 360 additional role in the study design, data collection and analysis, decision to publish, or  
29  
30 361 preparation of the manuscript.  
31  
32

33  
34  
35 362 **Author contributions** KW, MN and CH designed the study. MN did data preparation and data  
36  
37 363 management. MN and KW performed the statistical analyses, with the contribution of SB, CH  
38  
39 364 and EB. KW drafted the main manuscript text. All authors assisted in the interpretation of the  
40  
41 365 results and critically revised the manuscript. All authors have read and approved the manuscript.  
42  
43  
44  
45

46  
47 366 **Data availability** Helsana provides the data that support up the findings of this research.  
48  
49 367 (<https://www.helsana.ch/en/helsana-group>). These data, which were used under license for the  
50  
51 368 present study and are not accessible to the general public, are subject to restrictions. But with  
52  
53 369 Helsana's consent and upon reasonable request, data are available from the authors  
54  
55 370 ([gesundheitskompetenz@helsana.ch](mailto:gesundheitskompetenz@helsana.ch)).  
56  
57  
58  
59  
60

1  
2  
3 371 **Ethics approval** The data used in this study were retrospective, pre-existing, de-identified, and  
4  
5 372 anonymous in accordance with privacy laws and regulations. This study was free from the  
6  
7 373 provisions of the Swiss Federal Law on Human Research because it used retrospective, de-  
8  
9 374 identified, and anonymized data (Humanforschungsgesetz) [68] and was thus exempted from  
10  
11 375 receiving clearance from the regional ethics committee (the ethical committee of the Canton of  
12  
13 376 Zurich) as well as from obtaining the patients' informed consent.  
14  
15  
16  
17  
18

19 377 **Consent to participate** Not applicable.  
20  
21  
22  
23

24 378 **Consent to publish** Not applicable.  
25  
26  
27

28 379 **Acknowledgements** Not applicable.  
29  
30  
31  
32  
33

## 34 380 **References**

- 35  
36 381 1. Doughman E. Number of drugs in global R&D pipeline projected to reach record high in  
37 382 2019. 2019. [https://www.rdmag.com/article/2019/05/number-drugs-global-r-d-pipeline-](https://www.rdmag.com/article/2019/05/number-drugs-global-r-d-pipeline-projected-reach-record-high-2019)  
38 383 [projected-reach-record-high-2019](https://www.rdmag.com/article/2019/05/number-drugs-global-r-d-pipeline-projected-reach-record-high-2019).  
39 384 2. Walsh G. Biopharmaceutical benchmarks 2018. *Nature Biotechnology*. 2018;36:1136–45.  
40 385 doi:10.1038/nbt.4305.  
41 386 3. Farhat F, Torres A, Park W, Lima Lopes G de, Mudad R, Ikpeazu C, Abi Aad S. The  
42 387 Concept of Biosimilars: From Characterization to Evolution-A Narrative Review.  
43 388 *Oncologist*. 2018;23:346–52. doi:10.1634/theoncologist.2017-0126.  
44 389 4. Kresse G-B. Biosimilars--science, status, and strategic perspective. *Eur J Pharm*  
45 390 *Biopharm*. 2009;72:479–86. doi:10.1016/j.ejpb.2009.02.014.  
46 391 5. FDA. Biosimilar and interchangeable products. 2019.  
47 392 <http://www.fda.gov/drugs/biosimilars/biosimilar-and-inter-changeable-products>.  
48 393 6. Interpharma. Positionspapier zu Biosimilars. 2013.  
49 394 [https://www.interpharma.ch/sites/default/files/positionspa-pier\\_biosimilars\\_juni-](https://www.interpharma.ch/sites/default/files/positionspa-pier_biosimilars_juni-2013.pdf)  
50 395 [2013.pdf](https://www.interpharma.ch/sites/default/files/positionspa-pier_biosimilars_juni-2013.pdf).  
51 396 7. Schur N., Twerenbold S., Reinau D., Schwenkglenks M., Meier C.R. Helsana-  
52 397 Arzneimittelreport für die Schweiz 2020. 2020. [https://www.helsana.ch/de/helsana-](https://www.helsana.ch/de/helsana-gruppe/medien-publikationen/helsana-reports/arzneimittelreport.html)  
53 398 [gruppe/medien-publikationen/helsana-reports/arzneimittelreport.html](https://www.helsana.ch/de/helsana-gruppe/medien-publikationen/helsana-reports/arzneimittelreport.html).  
54 399 8. Schur N., Twerenbold S., Reinau D., Schwenkglenks M., Meier C.R. Helsana-  
55 400 Arzneimittelreport für die Schweiz 2017. 2017. [https://www.helsana.ch/de/helsana-](https://www.helsana.ch/de/helsana-gruppe/medien-publikationen/helsana-reports/arzneimittelreport.html)  
56 401 [gruppe/medien-publikationen/helsana-reports/arzneimittelreport.html](https://www.helsana.ch/de/helsana-gruppe/medien-publikationen/helsana-reports/arzneimittelreport.html).  
57  
58  
59  
60

- 1  
2  
3 402 9. GaBI Journal Editor, GaBI Online Editor. Patent expiry dates for biologicals: 2017  
4 403 update. *GaBI Journal*. 2017;29–35.
- 5 404 10. EMA. European Medicines Agency. 2019. <https://www.ema.europa.eu/en>.
- 6 405 11. Frantzen L, Cohen J-D, Tropé S, Beck M, Munos A, Sittler M-A, et al. Patients'  
7 406 information and perspectives on biosimilars in rheumatology: A French nation-wide  
8 407 survey. *Joint Bone Spine*. 2019;86:491–6. doi:10.1016/j.jbspin.2019.01.001.
- 9 408 12. Halimi V, Daci A, Ancevska Netkovska K, Suturkova L, Babar Z-U-D, Grozdanova A.  
10 409 Clinical and Regulatory Concerns of Biosimilars: A Review of Literature. *Int J Environ*  
11 410 *Res Public Health* 2020. doi:10.3390/ijerph17165800.
- 12 411 13. Armuzzi A, Avedano L, Greveson K, Kang T. Nurses are Critical in Aiding Patients  
13 412 Transitioning to Biosimilars in Inflammatory Bowel Disease: Education and  
14 413 Communication Strategies. *J Crohns Colitis*. 2019;13:259–66. doi:10.1093/ecco-  
15 414 *jcc/jjy150*.
- 16 415 14. Leonard E, Wascovich M, Oskouei S, Gurz P, Carpenter D. Factors Affecting Health  
17 416 Care Provider Knowledge and Acceptance of Biosimilar Medicines: A Systematic  
18 417 Review. *J Manag Care Spec Pharm*. 2019;25:102–12. doi:10.18553/jmcp.2019.25.1.102.
- 19 418 15. Cohen HP, Blauvelt A, Rifkin RM, Danese S, Gokhale SB, Woollett G. Switching  
20 419 Reference Medicines to Biosimilars: A Systematic Literature Review of Clinical  
21 420 Outcomes. *Drugs*. 2018;78:463–78. doi:10.1007/s40265-018-0881-y.
- 22 421 16. Haller E, Watzke B, Blozik E, Rosemann T, Reich O, Huber CA, Wolf M. Antidepressant  
23 422 prescription practice and related factors in Switzerland: a cross-sectional analysis of  
24 423 health claims data. *BMC Psychiatry*. 2019;19:196. doi:10.1186/s12888-019-2178-4.
- 25 424 17. Huber CA, Schwenkglens M, Rapold R, Reich O. Epidemiology and costs of diabetes  
26 425 mellitus in Switzerland: an analysis of health care claims data, 2006 and 2011. *BMC*  
27 426 *Endocrine Disorders*. 2014;14:44. doi:10.1186/1472-6823-14-44.
- 28 427 18. Huber CA, Szucs TD, Rapold R, Reich O. Identifying patients with chronic conditions  
29 428 using pharmacy data in Switzerland: an updated mapping approach to the classification of  
30 429 medications. *BMC Public Health*. 2013;13:1030. doi:10.1186/1471-2458-13-1030.
- 31 430 19. Irene Kobler, Golda Lenzin, Florian Liberatore, Johannes Pöhlmann, Marion Schmidt,  
32 431 Simon Wieser. *Biosimilars in der Schweiz: Medizin gegen die steigenden*  
33 432 *Gesundheitskosten?* 2020.
- 34 433 20. EY. Global biosimilar policy comparison. 2017. [https://docplayer.net/100090337-Global-](https://docplayer.net/100090337-Global-biosimilar-policy-comparison-overview-of-biosimilar-policies-across-nine-major-markets-in-the-battle-to-control-health-care-sustainability.html)  
35 434 [biosimilar-policy-comparison-overview-of-biosimilar-policies-across-nine-major-](https://docplayer.net/100090337-Global-biosimilar-policy-comparison-overview-of-biosimilar-policies-across-nine-major-markets-in-the-battle-to-control-health-care-sustainability.html)  
36 435 [markets-in-the-battle-to-control-health-care-sustainability.html](https://docplayer.net/100090337-Global-biosimilar-policy-comparison-overview-of-biosimilar-policies-across-nine-major-markets-in-the-battle-to-control-health-care-sustainability.html).
- 37 436 21. Daniel Grandt, Veronika Lappe, Ingrid Schubert. *BARMER Arzneimittelreport*. 2021.
- 38 437 22. Pro Biosimilars. *Biosimilars in Zahlen 2019: Wie Biosimilars die deutsche*  
39 438 *Versorgungslandschaft verändern*. 2019.  
40 439 [https://probiosimilars.de/app/uploads/2022/06/Biosimilars-in-Zahlen-2019\\_DS.pdf](https://probiosimilars.de/app/uploads/2022/06/Biosimilars-in-Zahlen-2019_DS.pdf).  
41 440 Accessed 11 Oct 2022.
- 42 441 23. Shrank WH, Cox ER, Fischer MA, Mehta J, Choudhry NK. Patients' perceptions of  
43 442 generic medications. *Health Aff (Millwood)*. 2009;28:546–56.  
44 443 doi:10.1377/hlthaff.28.2.546.
- 45 444 24. Himmel W, Simmenroth-Nayda A, Niebling W, Ledig T, Jansen RD, Kochen MM, et al.  
46 445 What do primary care patients think about generic drugs? *Int J Clin Pharmacol Ther*.  
47 446 2005;43:472–9. doi:10.5414/cpp43472.
- 48 447 25. Kjoenniksen I, Lindbaek M, Granas AG. Patients' attitudes towards and experiences of  
49 448 generic drug substitution in Norway. *Pharm World Sci*. 2006;28:284–9.  
50 449 doi:10.1007/s11096-006-9043-5.

- 1  
2  
3 450 26. Rathe J, Larsen P, Andersen M, Paulsen M, Jarbøl D, Thomsen J, Soendergaard J.  
4 451 Associations between generic substitution and patients' attitudes, beliefs and experiences.  
5 452 *Eur J Clin Pharmacol.* 2013;69:1827–36. doi:10.1007/s00228-013-1539-z.  
6 453 27. Daly MJ, Guignard B, Nendaz M. Generic and biosimilar drug substitution: a panacea?  
7 454 [Médicaments génériques et biosimilaires: une panacée?]. *Rev Med Suisse.*  
8 455 2015;11:1909-12, 1914.  
9 456 28. Cesaro S, Tintori V, Nesi F, Schiavello E, Calore E, Dallorso S, et al. A prospective study  
10 457 on the efficacy of mobilization of autologous peripheral stem cells in pediatric  
11 458 oncohematology patients. *Transfusion.* 2013;53:1501–9. doi:10.1111/j.1537-  
12 459 2995.2012.03911.x.  
13 460 29. Manko J, Walter-Croneck A, Jawniak D, Grzasko N, Gorska-Kosicka M, Cioch M,  
14 461 Dmoszynska A. A clinical comparison of the efficacy and safety of biosimilar G-CSF and  
15 462 originator G-CSF in haematopoietic stem cell mobilization. *Pharmacol Rep.*  
16 463 2014;66:239–42. doi:10.1016/j.pharep.2013.09.005.  
17 464 30. Michallet M, Luporsi E, Soubeyran P, Amar NA, Boulanger V, Carreiro M, et al.  
18 465 BiOsimilaRs in the management of anaemia secondary to chemotherapy in HaEmatology  
19 466 and Oncology: results of the ORHEO observational study. *BMC Cancer.* 2014;14:503.  
20 467 doi:10.1186/1471-2407-14-503.  
21 468 31. Mysler E, Azevedo VF, Danese S, Alvarez D, Iikuni N, Ingram B, et al. Biosimilar-to-  
22 469 Biosimilar Switching: What is the Rationale and Current Experience? *Drugs.*  
23 470 2021;81:1859–79. doi:10.1007/s40265-021-01610-1.  
24 471 32. Moots R, Azevedo V, Coindreau JL, Dörner T, Mahgoub E, Mysler E, et al. Switching  
25 472 Between Reference Biologics and Biosimilars for the Treatment of Rheumatology,  
26 473 Gastroenterology, and Dermatology Inflammatory Conditions: Considerations for the  
27 474 Clinician. *Curr Rheumatol Rep.* 2017;19:37. doi:10.1007/s11926-017-0658-4.  
28 475 33. Danese S, Fiorino G, Raine T, Ferrante M, Kemp K, Kierkus J, et al. ECCO Position  
29 476 Statement on the Use of Biosimilars for Inflammatory Bowel Disease-An Update. *J*  
30 477 *Crohns Colitis.* 2017;11:26–34. doi:10.1093/ecco-jcc/jjw198.  
31 478 34. Cohen HP, Blauvelt A, Rifkin RM, Danese S, Gokhale SB, Woollett G. Switching  
32 479 Reference Medicines to Biosimilars: A Systematic Literature Review of Clinical  
33 480 Outcomes. *Drugs.* 2018;78:463–78. doi:10.1007/s40265-018-0881-y.  
34 481 35. Håkonsen H, Eilertsen M, Borge H, Toverud E-L. Generic substitution: additional  
35 482 challenge for adherence in hypertensive patients? *Curr Med Res Opin.* 2009;25:2515–21.  
36 483 doi:10.1185/03007990903192223.  
37 484 36. Blackwell K, Semiglazov V, Krasnozhon D, Davidenko I, Nelyubina L, Nakov R, et al.  
38 485 Comparison of EP2006, a filgrastim biosimilar, to the reference: a phase III, randomized,  
39 486 double-blind clinical study in the prevention of severe neutropenia in patients with breast  
40 487 cancer receiving myelosuppressive chemotherapy. *Ann Oncol.* 2015;26:1948–53.  
41 488 doi:10.1093/annonc/mdv281.  
42 489 37. Blauvelt A, Lacour J-P, Fowler JF, Schuck E, Jauch-Lembach J, editor. A phase III  
43 490 confirmatory study comparing GP2017 with reference adalimumab in patients with  
44 491 moderate-to-severe chronic plaque psoriasis: 51 week results from the ADACCESS study;  
45 492 2017.  
46 493 38. Griffiths CEM, Thaçi D, Gerdes S, Arenberger P, Pulka G, Kingo K, et al. The  
47 494 EGALITY study: a confirmatory, randomized, double-blind study comparing the  
48 495 efficacy, safety and immunogenicity of GP2015, a proposed etanercept biosimilar, vs. the  
49 496 originator product in patients with moderate-to-severe chronic plaque-type psoriasis. *Br J*  
50 497 *Dermatol.* 2017;176:928–38. doi:10.1111/bjd.15152.  
51 498 39. Yazici Y, Xie L, Ogbomo A, Parenti D, Goyal K, Teeple A. A descriptive analysis of  
52 499 real-world treatment patterns in a Turkish rheumatology population that continued



- 1  
2  
3 500 innovator infliximab (Remicade) therapy or switched to biosimilar infliximab. *Arthritis*  
4 501 *Rheumatol.* 2016;68.
- 5 502 40. Kang Y-S, Moon HH, Lee SE, Lim YJ, Kang HW. Clinical Experience of the Use of CT-  
6 503 P13, a Biosimilar to Infliximab in Patients with Inflammatory Bowel Disease: A Case  
7 504 Series. *Digestive Diseases and Sciences.* 2015;60:951–6. doi:10.1007/s10620-014-3392-  
8 505 z.
- 9 506 41. NHS England and NHS improvement. What is a biosimilar medicine? 2019.  
10 507 [https://www.england.nhs.uk/wp-content/uploads/2019/05/what-is-a-biosimilar-medicine-](https://www.england.nhs.uk/wp-content/uploads/2019/05/what-is-a-biosimilar-medicine-guide-v2.pdf)  
11 508 [guide-v2.pdf](https://www.england.nhs.uk/wp-content/uploads/2019/05/what-is-a-biosimilar-medicine-guide-v2.pdf). Accessed 5 Oct 2022.
- 12 509 42. Mayoral-Zavala A, Esquivel-Aguilar A, Del Real-Calzada CM, Gutiérrez-Grobe Y,  
13 510 Ramos-García J, Rocha-Ramírez JL, et al. Update on biosimilars in inflammatory bowel  
14 511 disease: Position and recommendations in Mexico. [Actualización sobre los  
15 512 medicamentos biocomparables en la enfermedad inflamatoria intestinal: posición y  
16 513 recomendación en México]. *Rev Gastroenterol Mex (Engl Ed).* 2018;83:414–23.  
17 514 doi:10.1016/j.rgm.2018.03.003.
- 18 515 43. Cantini F, Benucci M. Focus on biosimilar etanercept - bioequivalence and  
19 516 interchangeability. *Biologics.* 2018;12:87–95. doi:10.2147/BTT.S126854.
- 20 517 44. Busato A, Matter P, Künzi B, Goodman D. Geographic variation in the cost of  
21 518 ambulatory care in Switzerland. *J Health Serv Res Policy.* 2012;17:18–23.  
22 519 doi:10.1258/jhsrp.2011.010056.
- 23 520 45. Panczak R, Luta X, Maessen M, Stuck AE, Berlin C, Schmidlin K, et al. Regional  
24 521 Variation of Cost of Care in the Last 12 Months of Life in Switzerland: Small-area  
25 522 Analysis Using Insurance Claims Data. *Med Care.* 2017;55:155–63.  
26 523 doi:10.1097/MLR.0000000000000634.
- 27 524 46. Rémuzat C, Dorey J, Cristeau O, Ionescu D, Radière G, Toumi M. Key drivers for market  
28 525 penetration of biosimilars in Europe. *J Mark Access Health Policy.* 2017;5:1272308.  
29 526 doi:10.1080/20016689.2016.1272308.
- 30 527 47. Bocquet F, Paubel P, Fusier I, Cordonnier A-L, Le Pen C, Sinègre M. Biosimilar  
31 528 granulocyte colony-stimulating factor uptakes in the EU-5 markets: a descriptive analysis.  
32 529 *Appl Health Econ Health Policy.* 2014;12:315–26. doi:10.1007/s40258-014-0087-8.
- 33 530 48. Bocquet F, Paubel P, Fusier I, Cordonnier A-L, Sinègre M, Le Pen C. Biosimilar versus  
34 531 patented erythropoietins: learning from 5 years of European and Japanese experience.  
35 532 *Appl Health Econ Health Policy.* 2015;13:47–59. doi:10.1007/s40258-014-0125-6.
- 36 533 49. Drozdowska A, Hermanowski T. Exploring the opinions and experiences of patients with  
37 534 generic substitution: a representative study of Polish society. *Int J Clin Pharm.*  
38 535 2015;37:68–75. doi:10.1007/s11096-014-0041-8.
- 39 536 50. Heikkilä R, Mäntyselkä P, Ahonen R. Price, familiarity, and availability determine the  
40 537 choice of drug - a population-based survey five years after generic substitution was  
41 538 introduced in Finland. *BMC Clin Pharmacol.* 2011;11:20. doi:10.1186/1472-6904-11-20.
- 42 539 51. Rathe J, Søndergaard J, Jarbøl DE, Hallas J, Andersen M. Patients' concern about their  
43 540 medicine after a generic switch: a combined cross-sectional questionnaire and register  
44 541 study. *Pharmacoepidemiol Drug Saf.* 2014;23:965–73. doi:10.1002/pds.3671.
- 45 542 52. Shrank WH, Cadarette SM, Cox E, Fischer MA, Mehta J, Brookhart AM, et al. Is there a  
46 543 relationship between patient beliefs or communication about generic drugs and  
47 544 medication utilization? *Med Care.* 2009;47:319–25.  
48 545 doi:10.1097/MLR.0b013e31818af850.
- 49 546 53. Olsson E, Svensberg K, Wallach-Kildemoes H, Carlsson E, Hällkvist C, Kaae S,  
50 547 Sporrang SK. Swedish patients' trust in the bioequivalence of interchangeable generics.  
51 548 What factors are important for low trust? *Pharm Pract (Granada).* 2018;16:1298.  
52 549 doi:10.18549/PharmPract.2018.04.1298.

- 1  
2  
3 550 54. Chapman SCE, Horne R, Chater A, Hukins D, Smithson WH. Patients' perspectives on  
4 551 antiepileptic medication: relationships between beliefs about medicines and adherence  
5 552 among patients with epilepsy in UK primary care. *Epilepsy Behav.* 2014;31:312–20.  
6 553 doi:10.1016/j.yebeh.2013.10.016.  
7  
8 554 55. Faasse K, Grey A, Horne R, Petrie KJ. High perceived sensitivity to medicines is  
9 555 associated with higher medical care utilisation, increased symptom reporting and greater  
10 556 information-seeking about medication. *Pharmacoepidemiol Drug Saf.* 2015;24:592–9.  
11 557 doi:10.1002/pds.3751.  
12 558 56. Lee YH, Song GG. Comparative efficacy and safety of etanercept biosimilars in  
13 559 comparison with etanercept in patients with rheumatoid arthritis who have insufficient  
14 560 response to methotrexate: A network meta-analysis. *Int J Clin Pharmacol Ther.*  
15 561 2021;59:760–7. doi:10.5414/CP204049.  
16 562 57. Decollogny A, Egli Y, Halfon P, Lufkin TM. Determinants of generic drug substitution  
17 563 in Switzerland. *BMC Health Serv Res.* 2011;11:17. doi:10.1186/1472-6963-11-17.  
18 564 58. Daubenfeld T, Dassow J, Keßler M, Schulze J. Understanding the market dynamics of  
19 565 biosimilars. *Journal of Business Chemistry.* 2016.  
20 566 59. Shannon Coughlin. Market Research for the Pharmaceutical Benefits Schedule (PBS) and  
21 567 Biosimilar Medicines. 2016. [https://docsbay.net/market-research-for-the-pharmaceutical-](https://docsbay.net/market-research-for-the-pharmaceutical-benefits-schedule-pbs-and-biosimilar-medicines)  
22 568 [benefits-schedule-pbs-and-biosimilar-medicines.](https://docsbay.net/market-research-for-the-pharmaceutical-benefits-schedule-pbs-and-biosimilar-medicines)  
23 569 60. O'Callaghan J, Bermingham M, Leonard M, Hallinan F, Morris JM, Moore U, Griffin BT.  
24 570 Assessing awareness and attitudes of healthcare professionals on the use of biosimilar  
25 571 medicines: A survey of physicians and pharmacists in Ireland. *Regul Toxicol Pharmacol.*  
26 572 2017;88:252–61. doi:10.1016/j.yrtph.2017.06.013.  
27 573 61. Currie J, MacLeod WB, van Parys J. Provider practice style and patient health outcomes:  
28 574 The case of heart attacks. *Journal of Health Economics.* 2016;47:64–80.  
29 575 doi:10.1016/j.jhealeco.2016.01.013.  
30 576 62. Ebbers HC, Muenzberg M, Schellekens H. The safety of switching between therapeutic  
31 577 proteins. *Expert Opin Biol Ther.* 2012;12:1473–85. doi:10.1517/14712598.2012.711308.  
32 578 63. El Zorkany B, Al Ani N, Al Emadi S, Al Saleh J, Uthman I, El Dershaby Y, et al.  
33 579 Biosimilars in rheumatology: recommendations for regulation and use in Middle Eastern  
34 580 countries. *Clin Rheumatol.* 2018;37:1143–52. doi:10.1007/s10067-018-3982-9.  
35 581 64. Fiorino G, Caprioli F, Daperno M, Mocciano F, Principi M, Viscido A, et al. Use of  
36 582 biosimilars in inflammatory bowel disease: a position update of the Italian Group for the  
37 583 Study of Inflammatory Bowel Disease (IG-IBD). *Dig Liver Dis.* 2019;51:632–9.  
38 584 doi:10.1016/j.dld.2019.02.004.  
39 585 65. Kay J, Dörner T, Emery P, Kvien TK, Breedveld FC. Clinical trial and 'real-world' data  
40 586 support switching from a bio-originator to its biosimilar. *Ann Rheum Dis.* 2020;79:e44.  
41 587 doi:10.1136/annrheumdis-2018-214994.  
42 588 66. Wiland P, Batko B, Brzosko M, Kucharz EJ, Samborski W, Świerkot J, et al. Biosimilar  
43 589 switching - current state of knowledge. *Reumatologia.* 2018;56:234–42.  
44 590 doi:10.5114/reum.2018.77975.  
45 591 67. Sigurdardottir V, Svärd A. Repeated switches between reference product etanercept and  
46 592 biosimilar do not affect disease activity or retention rate of etanercept over 24 months - a  
47 593 cohort study with historical controls. *Joint Bone Spine.* 2019;86:529–30.  
48 594 doi:10.1016/j.jbspin.2018.12.003.  
49 595 68. Federal act of 30 September 2011 on research involving human beings (human research  
50 596 act, HRA). 2019. [https://www.admin.ch/opc/en/classified-](https://www.admin.ch/opc/en/classified-compilation/20061313/index.html)  
51 597 [compilation/20061313/index.html](https://www.admin.ch/opc/en/classified-compilation/20061313/index.html). Accessed 15 Jul 2022.  
52  
53  
54  
55  
56  
57  
58  
59  
60

1  
2  
3 **Figure title legend**  
4

5  
6 598 **Figure 1 Determinants of biosimilar initial prescription (logistic regression)**  
7  
8  
9  
10  
11  
12  
13  
14  
15  
16  
17  
18  
19  
20  
21  
22  
23  
24  
25  
26  
27  
28  
29  
30  
31  
32  
33  
34  
35  
36  
37  
38  
39  
40  
41  
42  
43  
44  
45  
46  
47  
48  
49  
50  
51  
52  
53  
54  
55  
56  
57  
58  
59  
60

For peer review only

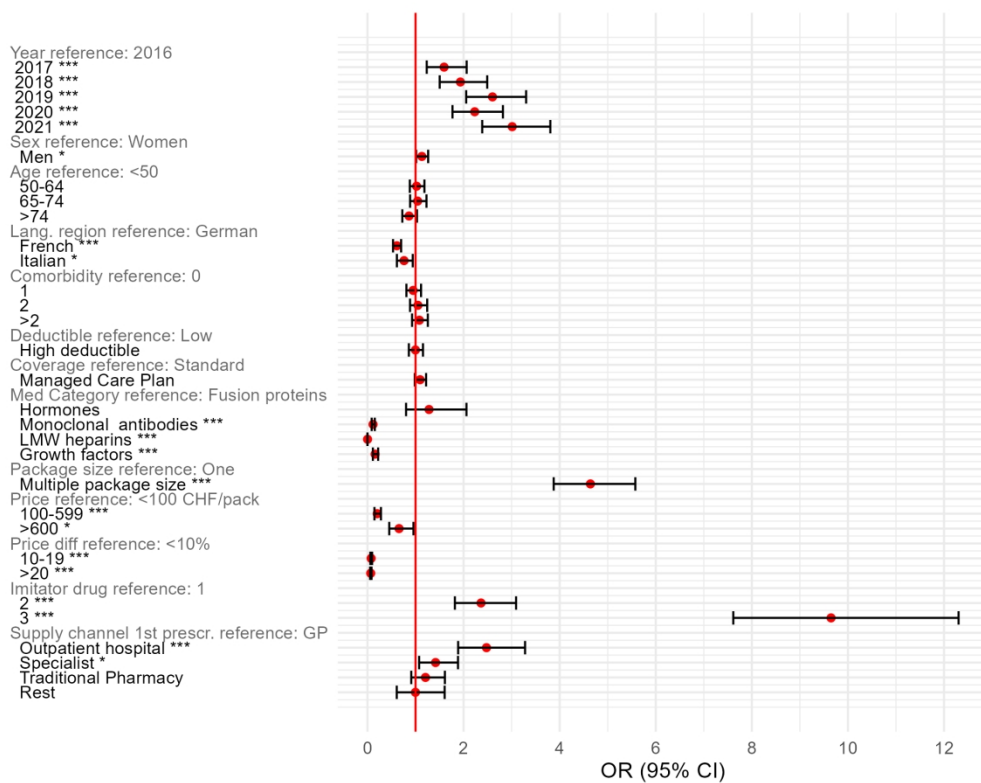

177x140mm (300 x 300 DPI)

Table A1 Substitution catalogue: reference product & biosimilar (2016-2021)

| ATC                                  | Reference Product |                  |               | Biosimilar      |                  |                  |               |
|--------------------------------------|-------------------|------------------|---------------|-----------------|------------------|------------------|---------------|
|                                      | medication        | Dose (mg) / unit | cost (in CHF) | medication      | Reimburment date | Dose (mg) / unit | cost (in CHF) |
| <i>Low-molecular-weight heparins</i> |                   |                  |               |                 |                  |                  |               |
| B01                                  | Clexane           | 20 / 10          | 41            | Inhixa          | 01.08.2020       | 20 / 10          | 38.55         |
| B01                                  | Clexane           | 20 / 50          | 139.55        | Inhixa          | 01.08.2020       | 20 / 50          | 127.25        |
| B01                                  | Clexane           | 40 / 2           | 17.35         | Inhixa          | 01.08.2020       | 40 / 2           | 16.45         |
| B01                                  | Clexane           | 40 / 10          | 62.45         | Inhixa          | 01.08.2020       | 40 / 10          | 57.85         |
| B01                                  | Clexane           | 40 / 50          | 246.75        | Inhixa          | 01.08.2020       | 40 / 50          | 223.7         |
| B01                                  | Clexane           | 60 / 10          | 76.65         | Inhixa          | 01.08.2020       | 60 / 10          | 70.6          |
| B01                                  | Clexane           | 80 / 10          | 102.3         | Inhixa          | 01.08.2020       | 80 / 10          | 93.7          |
| B01                                  | Clexane           | 100 / 10         | 123.75        | Inhixa          | 01.08.2020       | 100 / 10         | 113           |
| B01                                  | Clexane           | 120 / 10         | 134.9         | Inhixa          | 01.08.2020       | 120 / 10         | 123.05        |
| B01                                  | Clexane           | 150 / 10         | 161.3         | Inhixa          | 01.08.2020       | 150 / 10         | 146.8         |
| B01                                  | Clexane           | 300 / 1          | 41.3          | Inhixa          | 01.08.2020       | 300 / 1          | 38.8          |
| <i>Growth factors</i>                |                   |                  |               |                 |                  |                  |               |
| L03                                  | Neupogen          | 0.3 / 5          | 531.1         | Accofil         | 01.11.2019       | 0.3 / 5          | 479.65        |
|                                      |                   |                  |               | Filgrastim-Teva | 01.03.2010       | 0.3 / 5          | 479.65        |
|                                      |                   |                  |               | Zarzio          | 01.05.2010       | 0.3 / 5          | 479.65        |
| L03                                  | Neupogen          | 0.48 / 5         | 740.9         | Accofil         | 01.11.2019       | 0.48 / 5         | 668.45        |
|                                      |                   |                  |               | Filgrastim-Teva | 01.03.2010       | 0.48 / 5         | 668.45        |
|                                      |                   |                  |               | Zarzio          | 01.05.2010       | 0.48 / 5         | 668.45        |
| L03                                  | Neulasta          | 6 / 1            | 1668.75       | Grasustek       | 01.09.2021       | 6 / 1            | 1266.95       |
|                                      |                   |                  |               | Pelgraz         | 01.11.2019       | 6 / 1            | 1266.85       |
|                                      |                   |                  |               | Pelgraz         | 01.11.2019       | 6 / 1            | 1266.85       |
|                                      |                   |                  |               | Pelmeg          | 01.01.2020       | 6 / 1            | 857.55        |
|                                      |                   |                  |               | Ziextenzo       | 01.03.2020       | 6 / 1            | 1266.95       |
|                                      |                   |                  |               | Fulphila        | 01.06.2020       | 6 / 1            | 1266.85       |
| B03                                  | Epex              | 0.008 / 6        | 71.5          | Binocrit        | 01.10.2009       | 0.008 / 6        | 66.15         |
| B03                                  | Epex              | 0.017 / 6        | 126.55        | Binocrit        | 01.10.2009       | 0.017 / 6        | 115.7         |
| B03                                  | Epex              | 0.025 / 6        | 181.65        | Binocrit        | 01.10.2009       | 0.025 / 6        | 165.25        |
| B03                                  | Epex              | 0.037 / 6        | 236.75        | Binocrit        | 01.10.2009       | 0.037 / 6        | 214.7         |
| B03                                  | Epex              | 0.046 / 6        | 291.8         | Binocrit        | 01.10.2009       | 0.046 / 6        | 264.5         |
| B03                                  | Epex              | 0.092 / 6        | 567.2         | Binocrit        | 01.10.2009       | 0.092 / 6        | 512.1         |
| <i>Hormones</i>                      |                   |                  |               |                 |                  |                  |               |
| A10                                  | Lantus            | 10.9 / 5         | 81.85         | Abasaglar       | 01.09.2015       | 10.9 / 5         | 68.4          |
| G03                                  | GONAL-F           | 0.022 / 1        | 156.4         | Ovaleap         | 01.11.2018       | 0.022 / 1        | 122.05        |
| G03                                  | GONAL-F           | 0.033 / 1        | 226.45        | Ovaleap         | 01.11.2018       | 0.033 / 1        | 174.95        |

|                        |            |           |         |                  |            |           |         |
|------------------------|------------|-----------|---------|------------------|------------|-----------|---------|
| G03                    | GONAL-F    | 0.066 / 1 | 430.65  | Ovaleap          | 01.11.2018 | 0.066 / 1 | 329.1   |
| H01                    | Genotropin | 5 / 1     | 221.65  | Omnitrope        | 01.11.2010 | 5 / 1     | 201.1   |
| H01                    | Genotropin | 5 / 5     | 1041.9  | Omnitrope        | 01.11.2010 | 5 / 5     | 940     |
| H05                    | Forsteo    | 0.25 / 1  | 412.75  | Movymia          | 01.09.2019 | 0.25 / 1  | 340.75  |
|                        |            |           |         | Terrosa          | 01.09.2019 | 0.25 / 1  | 340.75  |
|                        |            |           |         | Terrosa          | 01.09.2019 | 0.25 / 1  | 340.75  |
| <i>Fusion proteins</i> |            |           |         |                  |            |           |         |
| L01                    | MabThera   | 100 / 2   | 627.3   | Rixathon         | 01.09.2018 | 100 / 2   | 505.5   |
|                        |            |           |         | Truxima          | 01.01.2019 | 100 / 2   | 505.5   |
| L01                    | MabThera   | 500 / 1   | 1515.65 | Rixathon         | 01.09.2018 | 500 / 1   | 1225.7  |
|                        |            |           |         | Truxima          | 01.01.2019 | 500 / 1   | 1225.7  |
| L01                    | Herceptin  | 150 / 1   | 686.4   | Herzuma          | 01.12.2021 | 150 / 1   | 562.45  |
|                        |            |           |         | Trazimera        | 01.10.2019 | 150 / 1   | 562.45  |
|                        |            |           |         | Kanjinti         | 01.02.2020 | 150 / 1   | 562.45  |
|                        |            |           |         | Ogivri           | 01.09.2020 | 150 / 1   | 562.45  |
| L01                    | Herceptin  | 440 / 1   | 1932.85 | Herzuma          | 01.12.2021 | 150 / 1   | 1586.75 |
|                        |            |           |         | Trazimera        | 01.10.2019 | 150 / 1   | 1586.75 |
|                        |            |           |         | Kanjinti         | 01.02.2020 | 150 / 1   | 1586.75 |
|                        |            |           |         | Ogivri           | 01.09.2020 | 150 / 1   | 1586.75 |
| L01                    | Avastin    | 100 / 1   | 410.65  | Oyavas           | 01.08.2021 | 100 / 1   | 312.1   |
|                        |            |           |         | Bevacizumab-Teva | 01.07.2021 | 100 / 1   | 312.1   |
|                        |            |           |         | MVASI            | 01.07.2020 | 100 / 1   | 312.1   |
|                        |            |           |         | Zirabev          | 01.08.2020 | 100 / 1   | 312.1   |
| L01                    | Avastin    | 400 / 1   | 1469.5  | Oyavas           | 01.08.2021 | 400 / 1   | 1117.5  |
|                        |            |           |         | Bevacizumab-Teva | 01.07.2021 | 400 / 1   | 1117.5  |
|                        |            |           |         | MVASI            | 01.07.2020 | 400 / 1   | 1117.5  |
|                        |            |           |         | Zirabev          | 01.08.2020 | 400 / 1   | 1117.5  |
| L04                    | Enbrel     | 25 / 4    | 682.35  | Benepali         | 01.04.2019 | 25 / 4    | 515.8   |
|                        |            |           |         | Erelzi           | 01.07.2018 | 25 / 4    | 515.8   |
| L04                    | Enbrel     | 50 / 2    | 669.05  | Benepali         | 01.04.2019 | 50 / 2    | 504.3   |
|                        |            |           |         | Erelzi           | 01.07.2018 | 50 / 2    | 505.9   |
| L04                    | Remicade   | 100 / 1   | 695.75  | Inflectra        | 01.08.2016 | 100 / 1   | 627.25  |
|                        |            |           |         | Remsima          | 01.01.2016 | 100 / 1   | 627.25  |
| L04                    | Humira     | 20 / 2    | 661.8   | Hyrimoz          | 01.11.2019 | 20 / 2    | 500.45  |
| L04                    | Humira     | 40 / 1    | 661.8   | Abrilada         | 01.06.2021 | 40 / 1    | 500.45  |
|                        |            |           |         | Amgevita         | 01.11.2019 | 40 / 1    | 500.45  |
|                        |            |           |         | Hyrimoz          | 01.11.2019 | 40 / 1    | 500.45  |
|                        |            |           |         | Idacio           | 01.08.2020 | 40 / 1    | 500.45  |
|                        |            |           |         | Imraldi          | 01.07.2020 | 40 / 1    | 498.55  |
|                        |            |           |         | Hulio            | 01.08.2020 | 40 / 1    | 500.45  |

**Table A2 First Prescriptions: Reference Products (active substance)**

| Active substance | total         | 2016        | 2017        | 2018        | 2019        | 2020          | 2021          |
|------------------|---------------|-------------|-------------|-------------|-------------|---------------|---------------|
| n                | 14'987        | 433 (2.9%)  | 394 (2.6%)  | 501 (3.3%)  | 861 (5.7%)  | 4'525 (30.2%) | 8'273 (55.2%) |
| Adalimumab       | 369 (2.5%)    | 0 (0.0%)    | 0 (0.0%)    | 0 (0.0%)    | 24 (2.8%)   | 182 (4.0%)    | 163 (2.0%)    |
| Bevacizumab      | 267 (1.8%)    | 0 (0.0%)    | 0 (0.0%)    | 0 (0.0%)    | 0 (0.0%)    | 96 (2.1%)     | 171 (2.1%)    |
| Enoxaparin       | 9'785 (65.3%) | 0 (0.0%)    | 0 (0.0%)    | 0 (0.0%)    | 0 (0.0%)    | 3'047 (67.3%) | 6'738 (81.4%) |
| Epoetin alfa     | 136 (0.9%)    | 20 (4.6%)   | 30 (7.6%)   | 19 (3.8%)   | 23 (2.7%)   | 24 (0.5%)     | 20 (0.2%)     |
| Etanercept       | 176 (1.2%)    | 0 (0.0%)    | 0 (0.0%)    | 37 (7.4%)   | 55 (6.4%)   | 38 (0.8%)     | 46 (0.6%)     |
| Filgrastim       | 658 (4.4%)    | 158 (36.5%) | 134 (34.0%) | 107 (21.4%) | 85 (9.9%)   | 104 (2.3%)    | 70 (0.8%)     |
| Follitropin alfa | 747 (5.0%)    | 0 (0.0%)    | 0 (0.0%)    | 41 (8.2%)   | 182 (21.1%) | 226 (5.0%)    | 298 (3.6%)    |
| Infliximab       | 530 (3.5%)    | 141 (32.6%) | 103 (26.1%) | 74 (14.8%)  | 68 (7.9%)   | 68 (1.5%)     | 76 (0.9%)     |
| Insulin glargin  | 640 (4.3%)    | 113 (26.1%) | 127 (32.2%) | 126 (25.1%) | 102 (11.8%) | 88 (1.9%)     | 84 (1.0%)     |
| Pegfilgrastim    | 457 (3.0%)    | 0 (0.0%)    | 0 (0.0%)    | 0 (0.0%)    | 35 (4.1%)   | 225 (5.0%)    | 197 (2.4%)    |
| Rituximab        | 661 (4.4%)    | 0 (0.0%)    | 0 (0.0%)    | 97 (19.4%)  | 203 (23.6%) | 178 (3.9%)    | 183 (2.2%)    |
| Somatropin       | 5 (0.0%)      | 1 (0.2%)    | 0 (0.0%)    | 0 (0.0%)    | 2 (0.2%)    | 2 (0.0%)      | 0 (0.0%)      |
| Teriparatid      | 304 (2.0%)    | 0 (0.0%)    | 0 (0.0%)    | 0 (0.0%)    | 55 (6.4%)   | 134 (3.0%)    | 115 (1.4%)    |
| Trastuzumab      | 252 (1.7%)    | 0 (0.0%)    | 0 (0.0%)    | 0 (0.0%)    | 27 (3.1%)   | 113 (2.5%)    | 112 (1.4%)    |

**Table A3 First Prescriptions: Biosimilars (active substance)**

| Active substance | total         | 2016        | 2017        | 2018        | 2019        | 2020        | 2021          |
|------------------|---------------|-------------|-------------|-------------|-------------|-------------|---------------|
| n                | 3'489         | 261 (7.5%)  | 344 (9.9%)  | 393 (11.3%) | 616 (17.7%) | 809 (23.2%) | 1'066 (30.6%) |
| Adalimumab       | 165 (4.7%)    | 0 (0.0%)    | 0 (0.0%)    | 0 (0.0%)    | 7 (1.1%)    | 63 (7.8%)   | 95 (8.9%)     |
| Bevacizumab      | 28 (0.8%)     | 0 (0.0%)    | 0 (0.0%)    | 0 (0.0%)    | 0 (0.0%)    | 5 (0.6%)    | 23 (2.2%)     |
| Enoxaparin       | 76 (2.2%)     | 0 (0.0%)    | 0 (0.0%)    | 0 (0.0%)    | 0 (0.0%)    | 7 (0.9%)    | 69 (6.5%)     |
| Epoetin alfa     | 34 (1.0%)     | 8 (3.1%)    | 2 (0.6%)    | 7 (1.8%)    | 9 (1.5%)    | 3 (0.4%)    | 5 (0.5%)      |
| Etanercept       | 185 (5.3%)    | 0 (0.0%)    | 0 (0.0%)    | 10 (2.5%)   | 49 (8.0%)   | 69 (8.5%)   | 57 (5.3%)     |
| Filgrastim       | 1'854 (53.1%) | 243 (93.1%) | 271 (78.8%) | 295 (75.1%) | 342 (55.5%) | 336 (41.5%) | 367 (34.4%)   |
| Follitropin alfa | 219 (6.3%)    | 0 (0.0%)    | 0 (0.0%)    | 1 (0.3%)    | 40 (6.5%)   | 71 (8.8%)   | 107 (10.0%)   |
| Infliximab       | 281 (8.1%)    | 7 (2.7%)    | 31 (9.0%)   | 49 (12.5%)  | 54 (8.8%)   | 61 (7.5%)   | 79 (7.4%)     |
| Insulin glargin  | 141 (4.0%)    | 0 (0.0%)    | 39 (11.3%)  | 29 (7.4%)   | 33 (5.4%)   | 21 (2.6%)   | 19 (1.8%)     |
| Pegfilgrastim    | 129 (3.7%)    | 0 (0.0%)    | 0 (0.0%)    | 0 (0.0%)    | 0 (0.0%)    | 32 (4.0%)   | 97 (9.1%)     |
| Rituximab        | 318 (9.1%)    | 0 (0.0%)    | 0 (0.0%)    | 1 (0.3%)    | 78 (12.7%)  | 120 (14.8%) | 119 (11.2%)   |
| Somatropin       | 5 (0.1%)      | 3 (1.1%)    | 1 (0.3%)    | 1 (0.3%)    | 0 (0.0%)    | 0 (0.0%)    | 0 (0.0%)      |
| Teriparatid      | 47 (1.3%)     | 0 (0.0%)    | 0 (0.0%)    | 0 (0.0%)    | 4 (0.6%)    | 20 (2.5%)   | 23 (2.2%)     |
| Trastuzumab      | 7 (0.2%)      | 0 (0.0%)    | 0 (0.0%)    | 0 (0.0%)    | 0 (0.0%)    | 1 (0.1%)    | 6 (0.6%)      |

**Table A4 Rest prescriptions: Reference Products (active substance)**

| Active substance | total         | 2016         | 2017         | 2018         | 2019          | 2020          | 2021           |
|------------------|---------------|--------------|--------------|--------------|---------------|---------------|----------------|
| n                | 33'958        | 1'293 (3.8%) | 1'645 (4.8%) | 1'736 (5.1%) | 3'662 (10.8%) | 9'939 (29.3%) | 15'683 (46.2%) |
| Adalimumab       | 3'070 (9.0%)  | 0 (0.0%)     | 0 (0.0%)     | 0 (0.0%)     | 41 (1.1%)     | 1'354 (13.6%) | 1'675 (10.7%)  |
| Bevacizumab      | 2'109 (6.2%)  | 0 (0.0%)     | 0 (0.0%)     | 0 (0.0%)     | 0 (0.0%)      | 481 (4.8%)    | 1'628 (10.4%)  |
| Enoxaparin       | 8'669 (25.5%) | 0 (0.0%)     | 0 (0.0%)     | 0 (0.0%)     | 0 (0.0%)      | 2'343 (23.6%) | 6'326 (40.3%)  |
| Epoetin alfa     | 2'052 (6.0%)  | 234 (18.1%)  | 385 (23.4%)  | 408 (23.5%)  | 200 (5.5%)    | 422 (4.2%)    | 403 (2.6%)     |
| Etanercept       | 791 (2.3%)    | 0 (0.0%)     | 0 (0.0%)     | 90 (5.2%)    | 310 (8.5%)    | 198 (2.0%)    | 193 (1.2%)     |
| Filgrastim       | 2'252 (6.6%)  | 408 (31.6%)  | 428 (26.0%)  | 403 (23.2%)  | 275 (7.5%)    | 403 (4.1%)    | 335 (2.1%)     |
| Follitropin alfa | 1'914 (5.6%)  | 0 (0.0%)     | 0 (0.0%)     | 19 (1.1%)    | 502 (13.7%)   | 561 (5.6%)    | 832 (5.3%)     |
| Infliximab       | 2'973 (8.8%)  | 543 (42.0%)  | 660 (40.1%)  | 424 (24.4%)  | 434 (11.9%)   | 435 (4.4%)    | 477 (3.0%)     |
| Insulin glargin  | 1'036 (3.1%)  | 108 (8.4%)   | 170 (10.3%)  | 134 (7.7%)   | 443 (12.1%)   | 112 (1.1%)    | 69 (0.4%)      |
| Pegfilgrastim    | 1'426 (4.2%)  | 0 (0.0%)     | 0 (0.0%)     | 0 (0.0%)     | 78 (2.1%)     | 699 (7.0%)    | 649 (4.1%)     |
| Rituximab        | 3'148 (9.3%)  | 0 (0.0%)     | 0 (0.0%)     | 258 (14.9%)  | 1'177 (32.1%) | 814 (8.2%)    | 899 (5.7%)     |
| Somatropin       | 7 (0.0%)      | 0 (0.0%)     | 2 (0.1%)     | 0 (0.0%)     | 2 (0.1%)      | 3 (0.0%)      | 0 (0.0%)       |
| Teriparatid      | 1'791 (5.3%)  | 0 (0.0%)     | 0 (0.0%)     | 0 (0.0%)     | 79 (2.2%)     | 856 (8.6%)    | 856 (5.5%)     |
| Trastuzumab      | 2'720 (8.0%)  | 0 (0.0%)     | 0 (0.0%)     | 0 (0.0%)     | 121 (3.3%)    | 1'258 (12.7%) | 1'341 (8.6%)   |

**Table A5 Rest prescriptions: Biosimilars (active substance)**

| Active substance | total         | 2016        | 2017         | 2018         | 2019          | 2020          | 2021          |
|------------------|---------------|-------------|--------------|--------------|---------------|---------------|---------------|
| n                | 16'293        | 754 (4.6%)  | 1'071 (6.6%) | 1'578 (9.7%) | 2'644 (16.2%) | 4'349 (26.7%) | 5'897 (36.2%) |
| Adalimumab       | 3'100 (19.0%) | 0 (0.0%)    | 0 (0.0%)     | 0 (0.0%)     | 64 (2.4%)     | 1'256 (28.9%) | 1'780 (30.2%) |
| Bevacizumab      | 306 (1.9%)    | 0 (0.0%)    | 0 (0.0%)     | 0 (0.0%)     | 0 (0.0%)      | 21 (0.5%)     | 285 (4.8%)    |
| Enoxaparin       | 41 (0.3%)     | 0 (0.0%)    | 0 (0.0%)     | 0 (0.0%)     | 0 (0.0%)      | 3 (0.1%)      | 38 (0.6%)     |
| Epoetin alfa     | 844 (5.2%)    | 32 (4.2%)   | 114 (10.6%)  | 257 (16.3%)  | 369 (14.0%)   | 55 (1.3%)     | 17 (0.3%)     |
| Etanercept       | 930 (5.7%)    | 0 (0.0%)    | 0 (0.0%)     | 23 (1.5%)    | 247 (9.3%)    | 377 (8.7%)    | 283 (4.8%)    |
| Filgrastim       | 5'894 (36.2%) | 695 (92.2%) | 752 (70.2%)  | 897 (56.8%)  | 1'110 (42.0%) | 1'142 (26.3%) | 1'298 (22.0%) |
| Follitropin alfa | 583 (3.6%)    | 0 (0.0%)    | 0 (0.0%)     | 0 (0.0%)     | 74 (2.8%)     | 210 (4.8%)    | 299 (5.1%)    |
| Infliximab       | 1'507 (9.2%)  | 23 (3.1%)   | 115 (10.7%)  | 274 (17.4%)  | 278 (10.5%)   | 374 (8.6%)    | 443 (7.5%)    |
| Insulin glargin  | 509 (3.1%)    | 0 (0.0%)    | 80 (7.5%)    | 126 (8.0%)   | 143 (5.4%)    | 98 (2.3%)     | 62 (1.1%)     |
| Pegfilgrastim    | 406 (2.5%)    | 0 (0.0%)    | 0 (0.0%)     | 0 (0.0%)     | 0 (0.0%)      | 125 (2.9%)    | 281 (4.8%)    |
| Rituximab        | 1'763 (10.8%) | 0 (0.0%)    | 0 (0.0%)     | 0 (0.0%)     | 356 (13.5%)   | 564 (13.0%)   | 843 (14.3%)   |
| Somatropin       | 16 (0.1%)     | 4 (0.5%)    | 10 (0.9%)    | 1 (0.1%)     | 1 (0.0%)      | 0 (0.0%)      | 0 (0.0%)      |
| Teriparatid      | 297 (1.8%)    | 0 (0.0%)    | 0 (0.0%)     | 0 (0.0%)     | 2 (0.1%)      | 114 (2.6%)    | 181 (3.1%)    |
| Trastuzumab      | 97 (0.6%)     | 0 (0.0%)    | 0 (0.0%)     | 0 (0.0%)     | 0 (0.0%)      | 10 (0.2%)     | 87 (1.5%)     |

**Table A6 Biosimilars quota by active substance**

| Active substance | Avg. relative Price difference | Biosimilars quota (IP+RP) |       |       |       |       |       |
|------------------|--------------------------------|---------------------------|-------|-------|-------|-------|-------|
|                  |                                | 2016                      | 2017  | 2018  | 2019  | 2020  | 2021  |
| Adalimumab       | 24.63                          | -                         | -     | -     | 52.21 | 46.2  | 50.5  |
| Bevacizumab      | 23.98                          | -                         | -     | -     | -     | 4.31  | 14.62 |
| Enoxaparin       | 7.77                           | -                         | -     | -     | -     | <1    | <1    |
| Epoetin alfa     | 8.91                           | 3.1                       | 21.85 | 38.21 | 62.9  | 11.51 | 4.94  |
| Etanercept       | 24.52                          | -                         | -     | 20.63 | 44.78 | 65.4  | 58.72 |



1  
2  
3  
4  
5  
6  
7  
8  
9  
10  
11  
12  
13  
14  
15  
16  
17  
18  
19  
20  
21  
22  
23  
24  
25  
26  
27  
28  
29  
30  
31  
32  
33  
34  
35  
36  
37  
38  
39  
40  
41  
42  
43  
44  
45  
46  
47  
48  
49  
50  
51  
52  
53  
54  
55  
56  
57  
58  
59  
60

|                  |       |       |       |       |       |       |       |
|------------------|-------|-------|-------|-------|-------|-------|-------|
| Filgrastim       | 9.73  | 62.37 | 64.54 | 70.04 | 80.13 | 74.46 | 80.43 |
| Follitropin alfa | 22.76 | -     | -     | 1.64  | 14.29 | 26.31 | 26.43 |
| Infliximab       | 9.85  | 4.2   | 15.53 | 39.34 | 39.81 | 46.38 | 48.56 |
| Insulin glargin  | 16.43 | -     | 33.62 | 37.35 | 24.41 | 37.3  | 34.62 |
| Pegfilgrastim    | 48.61 | -     | -     | -     | -     | 14.52 | 30.88 |
| Rituximab        | 19.27 | -     | -     | <1    | 23.93 | 40.81 | 47.06 |
| Somatropin       | 9.53  | 87.5  | 84.62 | 100   | 20    | 0     | -     |
| Teriparatid      | 17.44 | -     | -     | -     | 4.29  | 11.84 | 17.36 |
| Trastuzumab      | 17.98 | -     | -     | -     | -     | <1    | 6.02  |

**Table A7 Frequency of medication switches by active substance**

| Category                      | Active substance | Proportion to all switches (%) |         |        |         |
|-------------------------------|------------------|--------------------------------|---------|--------|---------|
|                               |                  | RP to RP                       | RP to B | B to B | B to RP |
| Fusion proteins               | Etanercept       | 0.27                           | 4.4     | 0.29   | 1.59    |
| Hormones                      | Follitropin alfa | 9.41                           | 5.35    | 8.1    | 5.84    |
| Hormones                      | Insulin glargin  | 0.27                           | 2.95    | 0.17   | 2.72    |
| Hormones                      | Somatropin       | 0.02                           | 0.07    | 0      | 0       |
| Hormones                      | Teriparatid      | 0.21                           | 1.42    | 1.34   | 2.51    |
| Monoclonal antibodies         | Adalimumab       | 4.52                           | 4.04    | 1.75   | 4.63    |
| Monoclonal antibodies         | Bevacizumab      | 11.38                          | 1.67    | 4.31   | 5.98    |
| Monoclonal antibodies         | Infliximab       | 1.86                           | 8.95    | 2.33   | 6.4     |
| Monoclonal antibodies         | Rituximab        | 21.81                          | 11.75   | 31.24  | 13.05   |
| Monoclonal antibodies         | Trastuzumab      | 6.94                           | 1.02    | 1.52   | 7.89    |
| Low-molecular-weight heparins | Enoxaparin       | 25.57                          | 0.65    | 0.06   | 30.88   |
| Growth factors                | Epoetin alfa     | 14.22                          | 1.16    | 24.94  | 1.17    |
| Growth factors                | Filgrastim       | 2.4                            | 50.75   | 21.5   | 8.07    |
| Growth factors                | Pegfilgrastim    | 1.13                           | 5.82    | 2.45   | 9.27    |

**Table A8 Three models (A-C) assessing determinants of biosimilar first prescription (logistic regression)**

| Variables          | Model A:<br>sociodemographic variables | Model B:<br>Model A + medication variables | Model C:<br>Model B + provider variables |
|--------------------|----------------------------------------|--------------------------------------------|------------------------------------------|
|                    | Coeff. [95%CI]                         | Coeff. [95%CI]                             | Coeff. [95%CI]                           |
| Intercept          | 0.429 [0.355, 0.518]                   | 0.831 [0.49, 1.402]                        | 0.706 [0.399, 1.241]                     |
| Year:              |                                        |                                            |                                          |
| 2016 (reference)   |                                        |                                            |                                          |
| 2017               | 1.381 [1.129, 1.692]                   | 1.602 [1.246, 2.062]                       | 1.594 [1.233, 2.064]                     |
| 2018               | 1.354 [1.113, 1.648]                   | 1.983 [1.551, 2.539]                       | 1.934 [1.503, 2.492]                     |
| 2019               | 1.493 [1.246, 1.793]                   | 2.64 [2.094, 3.332]                        | 2.602 [2.054, 3.302]                     |
| 2020               | 0.42 [0.356, 0.497]                    | 2.203 [1.755, 2.769]                       | 2.232 [1.769, 2.819]                     |
| 2021               | 0.302 [0.256, 0.355]                   | 3.077 [2.452, 3.867]                       | 3.012 [2.388, 3.806]                     |
| Sex:               |                                        |                                            |                                          |
| Female (reference) |                                        |                                            |                                          |
| Male               | 0.998 [0.922, 1.081]                   | 1.137 [1.02, 1.267]                        | 1.132 [1.014, 1.263]                     |

|    |                                    |                      |                       |                       |
|----|------------------------------------|----------------------|-----------------------|-----------------------|
| 1  |                                    |                      |                       |                       |
| 2  |                                    |                      |                       |                       |
| 3  | Age:                               |                      |                       |                       |
| 4  | <50 (reference)                    |                      |                       |                       |
| 5  | 50-64                              | 1.302 [1.169, 1.452] | 1.005 [0.867, 1.164]  | 1.022 [0.881, 1.185]  |
| 6  | 65-74                              | 1.571 [1.401, 1.761] | 1.044 [0.889, 1.227]  | 1.044 [0.887, 1.228]  |
| 7  | >74                                | 0.961 [0.849, 1.086] | 0.825 [0.694, 0.98]   | 0.864 [0.725, 1.03]   |
| 8  | Language region                    |                      |                       |                       |
| 9  | German (reference)                 |                      |                       |                       |
| 10 | French                             | 0.578 [0.521, 0.64]  | 0.582 [0.51, 0.664]   | 0.611 [0.532, 0.7]    |
| 11 | Italian                            | 0.467 [0.397, 0.546] | 0.744 [0.601, 0.918]  | 0.761 [0.612, 0.942]  |
| 12 | Number of comorbidity:             |                      |                       |                       |
| 13 | 0 (reference)                      |                      |                       |                       |
| 14 | 1                                  | 1.054 [0.932, 1.191] | 0.934 [0.796, 1.094]  | 0.95 [0.81, 1.115]    |
| 15 | 2                                  | 1.095 [0.963, 1.244] | 1.041 [0.88, 1.23]    | 1.05 [0.886, 1.243]   |
| 16 | >2                                 | 0.938 [0.837, 1.051] | 1.05 [0.904, 1.22]    | 1.08 [0.928, 1.256]   |
| 17 | Deductible:                        |                      |                       |                       |
| 18 | Low (reference)                    |                      |                       |                       |
| 19 | High                               | 1.067 [0.954, 1.192] | 1.005 [0.868, 1.163]  | 0.998 [0.861, 1.155]  |
| 20 | Managed care                       | 1.029 [0.949, 1.116] | 1.103 [0.992, 1.226]  | 1.095 [0.984, 1.22]   |
| 21 | Category:                          |                      |                       |                       |
| 22 | Fusion proteins (reference)        |                      |                       |                       |
| 23 | Hormones                           |                      | 1.297 [0.816, 2.081]  | 1.281 [0.803, 2.06]   |
| 24 | Monoclonal antibodies              |                      | 0.152 [0.116, 0.199]  | 0.115 [0.087, 0.152]  |
| 25 | Low-molecular-weight heparins      |                      | 0.001 [0.001, 0.001]  | 0.001 [0, 0.001]      |
| 26 | Growth factors                     |                      | 0.235 [0.168, 0.327]  | 0.158 [0.112, 0.222]  |
| 27 | Multiple package size              |                      | 4.551 [3.808, 5.461]  | 4.64 [3.876, 5.575]   |
| 28 | Cost per package of reference      |                      |                       |                       |
| 29 | product (in CHF)                   |                      |                       |                       |
| 30 | <100                               |                      |                       |                       |
| 31 | 100-599                            |                      | 0.254 [0.185, 0.349]  | 0.202 [0.145, 0.28]   |
| 32 | >600                               |                      | 0.853 [0.592, 1.236]  | 0.657 [0.453, 0.957]  |
| 33 | Relative price difference (%)      |                      |                       |                       |
| 34 | <10                                |                      |                       |                       |
| 35 | 10-19                              |                      | 0.091 [0.072, 0.115]  | 0.076 [0.059, 0.096]  |
| 36 | >20                                |                      | 0.067 [0.053, 0.084]  | 0.067 [0.054, 0.084]  |
| 37 | Number of available imitator drug: |                      |                       |                       |
| 38 | 1 (reference)                      |                      |                       |                       |
| 39 | 2                                  |                      | 2.15 [1.671, 2.785]   | 2.363 [1.819, 3.093]  |
| 40 | >2                                 |                      | 8.143 [6.502, 10.248] | 9.649 [7.614, 12.303] |
| 41 | Suppl                              |                      |                       |                       |
| 42 | General practitioner (reference)   |                      |                       |                       |
| 43 | Outpatient hospital                |                      |                       | 2.477 [1.887, 3.28]   |
| 44 | Specialist                         |                      |                       | 1.417 [1.075, 1.884]  |
| 45 | Traditional pharmacy               |                      |                       | 1.207 [0.911, 1.611]  |
| 46 | Rest                               |                      |                       | 0.998 [0.609, 1.606]  |
| 47 | Observations                       | 18'953               | 18'953                | 18'953                |
| 48 | AIC                                | 16'588               | 9'868                 | 9'735                 |
| 49 | BIC                                | 16'722               | 10'088                | 9'986                 |
| 50 |                                    |                      |                       |                       |
| 51 |                                    |                      |                       |                       |
| 52 |                                    |                      |                       |                       |
| 53 |                                    |                      |                       |                       |
| 54 |                                    |                      |                       |                       |
| 55 |                                    |                      |                       |                       |
| 56 |                                    |                      |                       |                       |
| 57 |                                    |                      |                       |                       |
| 58 |                                    |                      |                       |                       |
| 59 |                                    |                      |                       |                       |
| 60 |                                    |                      |                       |                       |

# Reporting checklist for cohort study.

Based on the STROBE cohort guidelines.

## Instructions to authors

Complete this checklist by entering the page numbers from your manuscript where readers will find each of the items listed below.

Your article may not currently address all the items on the checklist. Please modify your text to include the missing information. If you are certain that an item does not apply, please write "n/a" and provide a short explanation.

|                           | Reporting Item                                                                                                      | Page Number |
|---------------------------|---------------------------------------------------------------------------------------------------------------------|-------------|
| <b>Title and abstract</b> |                                                                                                                     |             |
| Title                     | <a href="#">#1a</a> Indicate the study's design with a commonly used term in the title or the abstract              | Title page  |
| Abstract                  | <a href="#">#1b</a> Provide in the abstract an informative and balanced summary of what was done and what was found | 1           |
| <b>Introduction</b>       |                                                                                                                     |             |
| Background / rationale    | <a href="#">#2</a> Explain the scientific background and rationale for the investigation being reported             | 2,3         |

|    |                      |                     |                                                    |                       |
|----|----------------------|---------------------|----------------------------------------------------|-----------------------|
| 1  | Objectives           | <a href="#">#3</a>  | State specific objectives, including any           | 3                     |
| 2  |                      |                     | prespecified hypotheses                            |                       |
| 3  |                      |                     |                                                    |                       |
| 4  |                      |                     |                                                    |                       |
| 5  |                      |                     |                                                    |                       |
| 6  | <b>Methods</b>       |                     |                                                    |                       |
| 7  |                      |                     |                                                    |                       |
| 8  |                      |                     |                                                    |                       |
| 9  |                      |                     |                                                    |                       |
| 10 | Study design         | <a href="#">#4</a>  | Present key elements of study design early in the  | 3,4,5                 |
| 11 |                      |                     | paper                                              |                       |
| 12 |                      |                     |                                                    |                       |
| 13 |                      |                     |                                                    |                       |
| 14 |                      |                     |                                                    |                       |
| 15 | Setting              | <a href="#">#5</a>  | Describe the setting, locations, and relevant      | 4,5,6                 |
| 16 |                      |                     | dates, including periods of recruitment, exposure, |                       |
| 17 |                      |                     | follow-up, and data collection                     |                       |
| 18 |                      |                     |                                                    |                       |
| 19 |                      |                     |                                                    |                       |
| 20 |                      |                     |                                                    |                       |
| 21 |                      |                     |                                                    |                       |
| 22 |                      |                     |                                                    |                       |
| 23 | Eligibility criteria | <a href="#">#6a</a> | Give the eligibility criteria, and the sources and | 4                     |
| 24 |                      |                     | methods of selection of participants. Describe     |                       |
| 25 |                      |                     | methods of follow-up.                              |                       |
| 26 |                      |                     |                                                    |                       |
| 27 |                      |                     |                                                    |                       |
| 28 |                      |                     |                                                    |                       |
| 29 |                      |                     |                                                    |                       |
| 30 | Eligibility criteria | <a href="#">#6b</a> | For matched studies, give matching criteria and    | n/a. The resent study |
| 31 |                      |                     | number of exposed and unexposed                    | does not contain      |
| 32 |                      |                     |                                                    | matched studies       |
| 33 |                      |                     |                                                    |                       |
| 34 |                      |                     |                                                    |                       |
| 35 |                      |                     |                                                    |                       |
| 36 |                      |                     |                                                    |                       |
| 37 |                      |                     |                                                    |                       |
| 38 | Variables            | <a href="#">#7</a>  | Clearly define all outcomes, exposures,            | 4,5,6                 |
| 39 |                      |                     | predictors, potential confounders, and effect      |                       |
| 40 |                      |                     | modifiers. Give diagnostic criteria, if applicable |                       |
| 41 |                      |                     |                                                    |                       |
| 42 |                      |                     |                                                    |                       |
| 43 |                      |                     |                                                    |                       |
| 44 |                      |                     |                                                    |                       |
| 45 |                      |                     |                                                    |                       |
| 46 | Data sources /       | <a href="#">#8</a>  | For each variable of interest give sources of data | 3,4                   |
| 47 | measurement          |                     | and details of methods of assessment               |                       |
| 48 |                      |                     | (measurement). Describe comparability of           |                       |
| 49 |                      |                     | assessment methods if there is more than one       |                       |
| 50 |                      |                     | group. Give information separately for for         |                       |
| 51 |                      |                     | exposed and unexposed groups if applicable.        |                       |
| 52 |                      |                     |                                                    |                       |
| 53 |                      |                     |                                                    |                       |
| 54 |                      |                     |                                                    |                       |
| 55 |                      |                     |                                                    |                       |
| 56 |                      |                     |                                                    |                       |
| 57 |                      |                     |                                                    |                       |
| 58 |                      |                     |                                                    |                       |
| 59 |                      |                     |                                                    |                       |
| 60 |                      |                     |                                                    |                       |

|    |                |                      |                                                      |                      |
|----|----------------|----------------------|------------------------------------------------------|----------------------|
| 1  | Bias           | <a href="#">#9</a>   | Describe any efforts to address potential sources    | 6,7                  |
| 2  |                |                      | of bias                                              |                      |
| 3  |                |                      |                                                      |                      |
| 4  |                |                      |                                                      |                      |
| 5  |                |                      |                                                      |                      |
| 6  | Study size     | <a href="#">#10</a>  | Explain how the study size was arrived at            | 4                    |
| 7  |                |                      |                                                      |                      |
| 8  |                |                      |                                                      |                      |
| 9  | Quantitative   | <a href="#">#11</a>  | Explain how quantitative variables were handled      | 4,5,6                |
| 10 | variables      |                      | in the analyses. If applicable, describe which       |                      |
| 11 |                |                      | groupings were chosen, and why                       |                      |
| 12 |                |                      |                                                      |                      |
| 13 |                |                      |                                                      |                      |
| 14 |                |                      |                                                      |                      |
| 15 |                |                      |                                                      |                      |
| 16 | Statistical    | <a href="#">#12a</a> | Describe all statistical methods, including those    | 5,6                  |
| 17 | methods        |                      | used to control for confounding                      |                      |
| 18 |                |                      |                                                      |                      |
| 19 |                |                      |                                                      |                      |
| 20 | Statistical    | <a href="#">#12b</a> | Describe any methods used to examine                 | 5,6                  |
| 21 | methods        |                      | subgroups and interactions                           |                      |
| 22 |                |                      |                                                      |                      |
| 23 |                |                      |                                                      |                      |
| 24 |                |                      |                                                      |                      |
| 25 | Statistical    | <a href="#">#12c</a> | Explain how missing data were addressed              | 5,6 upon request of  |
| 26 | methods        |                      |                                                      | reviewer 2           |
| 27 |                |                      |                                                      |                      |
| 28 |                |                      |                                                      |                      |
| 29 |                |                      |                                                      |                      |
| 30 | Statistical    | <a href="#">#12d</a> | If applicable, explain how loss to follow-up was     | 6,7                  |
| 31 | methods        |                      | addressed                                            |                      |
| 32 |                |                      |                                                      |                      |
| 33 |                |                      |                                                      |                      |
| 34 | Statistical    | <a href="#">#12e</a> | Describe any sensitivity analyses                    | n/a                  |
| 35 | methods        |                      |                                                      |                      |
| 36 |                |                      |                                                      |                      |
| 37 |                |                      |                                                      |                      |
| 38 |                |                      |                                                      |                      |
| 39 | <b>Results</b> |                      |                                                      |                      |
| 40 |                |                      |                                                      |                      |
| 41 |                |                      |                                                      |                      |
| 42 |                |                      |                                                      |                      |
| 43 |                |                      |                                                      |                      |
| 44 | Participants   | <a href="#">#13a</a> | Report numbers of individuals at each stage of       | 3,4, upon request of |
| 45 |                |                      | study—eg numbers potentially eligible, examined      | reviewer 2           |
| 46 |                |                      | for eligibility, confirmed eligible, included in the |                      |
| 47 |                |                      | study, completing follow-up, and analysed. Give      |                      |
| 48 |                |                      |                                                      |                      |
| 49 |                |                      |                                                      |                      |
| 50 |                |                      |                                                      |                      |
| 51 |                |                      |                                                      |                      |
| 52 |                |                      |                                                      |                      |
| 53 |                |                      |                                                      |                      |
| 54 |                |                      |                                                      |                      |
| 55 |                |                      |                                                      |                      |
| 56 |                |                      |                                                      |                      |
| 57 |                |                      |                                                      |                      |
| 58 |                |                      |                                                      |                      |
| 59 |                |                      |                                                      |                      |
| 60 |                |                      |                                                      |                      |

|    |                  |                                                                        |                     |
|----|------------------|------------------------------------------------------------------------|---------------------|
| 1  |                  | information separately for exposed and                                 |                     |
| 2  |                  | unexposed groups if applicable.                                        |                     |
| 3  |                  |                                                                        |                     |
| 4  |                  |                                                                        |                     |
| 5  |                  |                                                                        |                     |
| 6  | Participants     | <a href="#">#13b</a> Give reasons for non-participation at each stage  | 4                   |
| 7  |                  |                                                                        |                     |
| 8  |                  |                                                                        |                     |
| 9  | Participants     | <a href="#">#13c</a> Consider use of a flow diagram                    | 4                   |
| 10 |                  |                                                                        |                     |
| 11 |                  |                                                                        |                     |
| 12 | Descriptive data | <a href="#">#14a</a> Give characteristics of study participants (eg    | 7,8                 |
| 13 |                  | demographic, clinical, social) and information on                      |                     |
| 14 |                  | exposures and potential confounders. Give                              |                     |
| 15 |                  | information separately for exposed and                                 |                     |
| 16 |                  | unexposed groups if applicable.                                        |                     |
| 17 |                  |                                                                        |                     |
| 18 |                  |                                                                        |                     |
| 19 |                  |                                                                        |                     |
| 20 |                  |                                                                        |                     |
| 21 |                  |                                                                        |                     |
| 22 |                  |                                                                        |                     |
| 23 |                  |                                                                        |                     |
| 24 | Descriptive data | <a href="#">#14b</a> Indicate number of participants with missing data | n/a. We excluded    |
| 25 |                  | for each variable of interest                                          | missing data before |
| 26 |                  |                                                                        | descriptively       |
| 27 |                  |                                                                        | analysing the study |
| 28 |                  |                                                                        | population          |
| 29 |                  |                                                                        |                     |
| 30 |                  |                                                                        |                     |
| 31 |                  |                                                                        |                     |
| 32 |                  |                                                                        |                     |
| 33 |                  |                                                                        |                     |
| 34 |                  |                                                                        |                     |
| 35 |                  |                                                                        |                     |
| 36 | Descriptive data | <a href="#">#14c</a> Summarise follow-up time (eg, average and total   | 7,8,9,10            |
| 37 |                  | amount)                                                                |                     |
| 38 |                  |                                                                        |                     |
| 39 |                  |                                                                        |                     |
| 40 |                  |                                                                        |                     |
| 41 |                  |                                                                        |                     |
| 42 | Outcome data     | <a href="#">#15</a> Report numbers of outcome events or summary        | 7,8,9,10            |
| 43 |                  | measures over time. Give information separately                        |                     |
| 44 |                  | for exposed and unexposed groups if applicable.                        |                     |
| 45 |                  |                                                                        |                     |
| 46 |                  |                                                                        |                     |
| 47 |                  |                                                                        |                     |
| 48 |                  |                                                                        |                     |
| 49 | Main results     | <a href="#">#16a</a> Give unadjusted estimates and, if applicable,     | 7,8,9,10,11         |
| 50 |                  | confounder-adjusted estimates and their                                |                     |
| 51 |                  | precision (eg, 95% confidence interval). Make                          |                     |
| 52 |                  |                                                                        |                     |
| 53 |                  |                                                                        |                     |
| 54 |                  |                                                                        |                     |
| 55 |                  |                                                                        |                     |
| 56 |                  |                                                                        |                     |
| 57 |                  |                                                                        |                     |
| 58 |                  |                                                                        |                     |
| 59 |                  |                                                                        |                     |
| 60 |                  |                                                                        |                     |

|    |                   |                                                                         |             |
|----|-------------------|-------------------------------------------------------------------------|-------------|
| 1  |                   | clear which confounders were adjusted for and                           |             |
| 2  |                   | why they were included                                                  |             |
| 3  |                   |                                                                         |             |
| 4  |                   |                                                                         |             |
| 5  |                   |                                                                         |             |
| 6  | Main results      | <a href="#">#16b</a> Report category boundaries when continuous         | 7,8,9,10,11 |
| 7  |                   |                                                                         |             |
| 8  |                   | variables were categorized                                              |             |
| 9  |                   |                                                                         |             |
| 10 |                   |                                                                         |             |
| 11 | Main results      | <a href="#">#16c</a> If relevant, consider translating estimates of     | 11          |
| 12 |                   | relative risk into absolute risk for a meaningful                       |             |
| 13 |                   | time period                                                             |             |
| 14 |                   |                                                                         |             |
| 15 |                   |                                                                         |             |
| 16 |                   |                                                                         |             |
| 17 |                   |                                                                         |             |
| 18 | Other analyses    | <a href="#">#17</a> Report other analyses done—eg analyses of           | n/a         |
| 19 |                   | subgroups and interactions, and sensitivity                             |             |
| 20 |                   | analyses                                                                |             |
| 21 |                   |                                                                         |             |
| 22 |                   |                                                                         |             |
| 23 |                   |                                                                         |             |
| 24 |                   |                                                                         |             |
| 25 |                   |                                                                         |             |
| 26 | <b>Discussion</b> |                                                                         |             |
| 27 |                   |                                                                         |             |
| 28 |                   |                                                                         |             |
| 29 | Key results       | <a href="#">#18</a> Summarise key results with reference to study       | 12          |
| 30 |                   | objectives                                                              |             |
| 31 |                   |                                                                         |             |
| 32 |                   |                                                                         |             |
| 33 |                   |                                                                         |             |
| 34 |                   |                                                                         |             |
| 35 | Limitations       | <a href="#">#19</a> Discuss limitations of the study, taking into       | 16          |
| 36 |                   | account sources of potential bias or imprecision.                       |             |
| 37 |                   | Discuss both direction and magnitude of any                             |             |
| 38 |                   | potential bias.                                                         |             |
| 39 |                   |                                                                         |             |
| 40 |                   |                                                                         |             |
| 41 |                   |                                                                         |             |
| 42 |                   |                                                                         |             |
| 43 |                   |                                                                         |             |
| 44 |                   |                                                                         |             |
| 45 | Interpretation    | <a href="#">#20</a> Give a cautious overall interpretation considering  | 12,13,14,15 |
| 46 |                   | objectives, limitations, multiplicity of analyses,                      |             |
| 47 |                   | results from similar studies, and other relevant                        |             |
| 48 |                   | evidence.                                                               |             |
| 49 |                   |                                                                         |             |
| 50 |                   |                                                                         |             |
| 51 |                   |                                                                         |             |
| 52 |                   |                                                                         |             |
| 53 |                   |                                                                         |             |
| 54 | Generalisability  | <a href="#">#21</a> Discuss the generalisability (external validity) of | 15,16       |
| 55 |                   | the study results                                                       |             |
| 56 |                   |                                                                         |             |
| 57 |                   |                                                                         |             |
| 58 |                   |                                                                         |             |
| 59 |                   |                                                                         |             |
| 60 |                   |                                                                         |             |

1 Other

2  
3 Information

4  
5  
6 Funding #22 Give the source of funding and the role of the 17  
7 funders for the present study and, if applicable,  
8  
9 for the original study on which the present article  
10  
11 is based  
12  
13  
14

15  
16 Notes:

- 17  
18  
19  
20 • 6b: n/a. The present study does not contain matched studies  
21  
22  
23 • 14b: n/a. We excluded missing data before descriptively analysing the study population  
24  
25  
26 • 20: 14,15,16,17 The STROBE checklist is distributed under the terms of the Creative Commons  
27 Attribution License CC-BY. This checklist was completed on 16. August 2022 using  
28 <https://www.goodreports.org/>, a tool made by the [EQUATOR Network](#) in collaboration with  
29 [Penelope.ai](#)  
30  
31  
32  
33  
34  
35  
36  
37  
38  
39  
40  
41  
42  
43  
44  
45  
46  
47  
48  
49  
50  
51  
52  
53  
54  
55  
56  
57  
58  
59  
60



# BMJ Open

## Initial prescriptions and medication switches of biological products: an analysis of prescription pathways and determinants in the Swiss healthcare setting

|                                 |                                                                                                                                                                                                                                                                                                                                        |
|---------------------------------|----------------------------------------------------------------------------------------------------------------------------------------------------------------------------------------------------------------------------------------------------------------------------------------------------------------------------------------|
| Journal:                        | <i>BMJ Open</i>                                                                                                                                                                                                                                                                                                                        |
| Manuscript ID                   | bmjopen-2023-077454.R1                                                                                                                                                                                                                                                                                                                 |
| Article Type:                   | Original research                                                                                                                                                                                                                                                                                                                      |
| Date Submitted by the Author:   | 09-Oct-2023                                                                                                                                                                                                                                                                                                                            |
| Complete List of Authors:       | Wirth, Kevin; Helsana Versicherungen AG, Boes, Stefan; University of Lucerne, Department of Health Sciences and Medicine<br>Näpflin, Markus; Helsana Group, Department of Health Sciences<br>Huber, Carola; Helsana Health Insurance Co, ; University Hospital Zurich,<br>Blozik, Eva; University of Zurich, Institute of Primary Care |
| <b>Primary Subject Heading</b>: | Health services research                                                                                                                                                                                                                                                                                                               |
| Secondary Subject Heading:      | Health policy, Medical management                                                                                                                                                                                                                                                                                                      |
| Keywords:                       | PUBLIC HEALTH, Health Literacy, MEDICAL EDUCATION & TRAINING                                                                                                                                                                                                                                                                           |
|                                 |                                                                                                                                                                                                                                                                                                                                        |

SCHOLARONE™  
Manuscripts

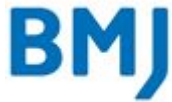

I, the Submitting Author has the right to grant and does grant on behalf of all authors of the Work (as defined in the below author licence), an exclusive licence and/or a non-exclusive licence for contributions from authors who are: i) UK Crown employees; ii) where BMJ has agreed a CC-BY licence shall apply, and/or iii) in accordance with the terms applicable for US Federal Government officers or employees acting as part of their official duties; on a worldwide, perpetual, irrevocable, royalty-free basis to BMJ Publishing Group Ltd ("BMJ") its licensees and where the relevant Journal is co-owned by BMJ to the co-owners of the Journal, to publish the Work in this journal and any other BMJ products and to exploit all rights, as set out in our [licence](#).

The Submitting Author accepts and understands that any supply made under these terms is made by BMJ to the Submitting Author unless you are acting as an employee on behalf of your employer or a postgraduate student of an affiliated institution which is paying any applicable article publishing charge ("APC") for Open Access articles. Where the Submitting Author wishes to make the Work available on an Open Access basis (and intends to pay the relevant APC), the terms of reuse of such Open Access shall be governed by a Creative Commons licence – details of these licences and which [Creative Commons](#) licence will apply to this Work are set out in our licence referred to above.

Other than as permitted in any relevant BMJ Author's Self Archiving Policies, I confirm this Work has not been accepted for publication elsewhere, is not being considered for publication elsewhere and does not duplicate material already published. I confirm all authors consent to publication of this Work and authorise the granting of this licence.

1  
2  
3 1 **Initial prescriptions and medication switches of biological products: an analysis of**  
4  
5 2 **prescription pathways and determinants in the Swiss healthcare setting**  
6  
7  
8  
9

10 3 Kevin Wirth<sup>1,2\*</sup>, Stefan Boes<sup>2</sup>, Markus Näpflin<sup>1</sup>, Carola A. Huber<sup>1,3</sup>, Eva Blozik<sup>3</sup>  
11  
12  
13

14 4 <sup>1</sup> Department of Health Sciences, Helsana Group, Zurich, Switzerland  
15

16 5 <sup>2</sup> Department of Health Sciences and Medicine, University of Lucerne, Lucerne, Switzerland  
17

18 6 <sup>3</sup> Institute of Primary Care, University of Zurich, Zurich, Switzerland  
19  
20  
21

22 7 \*Correspondence to:  
23

24 8 Kevin Wirth, Südstrasse 29, 8180 Bülach, Switzerland  
25

26 9 [kevin.wirth.migliazza@gmail.com](mailto:kevin.wirth.migliazza@gmail.com)  
27  
28  
29

30  
31  
32 10 Word count: 4100  
33  
34  
35

36 11 **ABSTRACT**

37 12 **Objectives** Biological products have contributed to extraordinary advances in disease  
38  
39 13 treatments over the last decade. However, the cost-saving potential of imitator products, so-  
40  
41 14 called biosimilars, is still under-researched in Switzerland. This study aims to assess  
42  
43 15 biosimilars' prescriptions at treatment initiation and their determinants, as well as biological  
44  
45 16 therapy switches.  
46  
47

48  
49 17 **Design** The study included all patients who had at least one biosimilar available on the market  
50  
51 18 at the time when they were prescribed a biologic product. We analyzed longitudinal data for  
52  
53 19 biosimilar prescriptions in Switzerland using descriptive statistics and logistic regression to  
54  
55 20 quantify the associations with individual, pharmaceutical, and provider-related variables.  
56  
57  
58  
59  
60

1  
2  
3 21 **Setting** The analysis is based on de-identified claims data of patients with mandatory health  
4  
5 22 insurance at Helsana, one of the Swiss health insurances with a substantial enrollee base in  
6  
7 23 mandatory health insurance.

8  
9  
10 24 **Participants** Overall, 18,953 patients receiving at least one biological product between 2016  
11  
12 25 and 2021 were identified.

13  
14 26 **Outcome measures:** We differentiated between initial prescriptions and follow-up  
15  
16 27 prescriptions. Our regression focused on initial prescriptions due to evidence indicating that  
17  
18 28 patients tend to follow the medication prescribed at therapy initiation.

19  
20 29 **Results** Although biosimilars market share was low (28.6%), the number of prescriptions has  
21  
22 30 increased (from 1016 in 2016 to 6976 in 2021). Few patients with medication switches (n=1492,  
23  
24 31 8.5%) were detected. Increased relative price difference (difference in the price of available  
25  
26 32 biosimilars relative to price of corresponding reference product) was associated with decreased  
27  
28 33 probability of biosimilar prescriptions, whereas male sex, an increase of available imitator  
29  
30 34 drugs on the market and, larger packaging sizes, and prescriptions from specialists or physicians  
31  
32 35 in outpatient settings were associated with increased biosimilars use.

33  
34 36 **Conclusion** The low number of biosimilar prescriptions despite the proliferating biosimilar  
35  
36 37 market indicates a high potential for biosimilar diffusion. The findings indicate that patients  
37  
38 38 typically adhere to the therapy options initially chosen and are less inclined to make changes  
39  
40 39 following the initiation of treatment. Our research highlights the need for awareness initiatives  
41  
42 40 to improve understanding among patients and physicians, enabling informed, shared decision-  
43  
44 41 making about biosimilar prescriptions.

45  
46  
47 42 **Keywords:** biosimilars, biologics, reference products, switches, initial prescription  
48  
49  
50  
51  
52  
53  
54  
55  
56  
57  
58  
59  
60

### 43 **Strengths and limitations of this study**

- 44 • This study evaluated the prescription of biosimilars using a broad set of  
45 sociodemographic, pharmaceutical, and healthcare provider variables and utilizing a  
46 nearly representative database in Switzerland.
- 47 • The study divided the medication treatment pathway into initial and follow-up  
48 prescriptions, with a specific focus on the initial prescriptions.
- 49 • The study assessed determinants of initial prescriptions in the context of biosimilars.
- 50 • Some demand-related factors (patients' health status, beliefs, and experiences) and  
51 supply-related factors (physicians' incentives and beliefs) about biosimilars could not  
52 be accounted using the claims data.

### 53 **INTRODUCTION**

54 Biological products increased the spectrum of available treatment options considerably in the  
55 treatment of many cancers and autoimmune diseases. However, these medications are more  
56 expensive compared to many conventional synthetic drugs as they are produced by living cells  
57 and, thus, require a more complex manufacturing process. Currently, there are a considerable  
58 number of biologics in the final stages of development and approval [1, 2]. The healthcare  
59 systems are likely to incur substantial costs even if just a small proportion of these biologics is  
60 granted market approval. One lever to curb rising drug costs is the replacement of biologics  
61 after patent expiration with less expensive imitator products, also known as biosimilars. Due to  
62 the biotechnological manufacturing process, exact copies of the biological products are not  
63 achievable. As a result, minor structural deviations in the biosimilar are unavoidable [3, 4], and  
64 regulatory authorities accept them for market approval [5, 6].

65 A study conducted in the United States found that biologics can undergo price reductions  
66 ranging from -2.4% to -59.3% in response to biosimilar competition, with the extent of these

1  
2  
3 67 reductions correlating with the adoption rate of biosimilars [7]. In Switzerland, a Swiss report  
4  
5 68 has estimated a cost saving potential of over 60 million Swiss francs for the complete  
6  
7 69 replacement of reference products with biosimilars in 2019 [8]. In the coming years, cost saving  
8  
9  
10 70 potential will increase as several top-selling biologics will lose their patent protection in  
11  
12 71 Switzerland [8, 9] and corresponding biosimilars have already been approved in the European  
13  
14 72 Union (EU) [2, 10, 11]. However, the realization of the cost saving potential us is assumed to  
15  
16  
17 73 be curbed because of skepticism about biosimilars from both the patient and physician side [12–  
18  
19 74 15]. At the same time, patients and their health care providers seem to be less willing to switch  
20  
21  
22 75 biological products when therapy has already been started [16–20]. Consequently, the choice  
23  
24 76 of initial prescription (IP) at therapy initiation is the decisive factor for following medication  
25  
26 77 prescriptions. Despite the significant role of IP in shaping subsequent treatment pathways,  
27  
28 78 research on the prescription behavior of biological products at therapy initiation and the impact  
29  
30  
31 79 of IP is limited. Existing studies have only demonstrated that patients tend to remain on their  
32  
33 80 initial biological treatment product once medication treatment has been initiated [21]. Thus,  
34  
35 81 there is a need for further investigation into the influencing factors of IP and their influence on  
36  
37 82 the choice of medication path. Thus, this study aims to assess biosimilars' prescriptions at  
38  
39  
40 83 treatment initiation and their determinants, as well as biological therapy switches.

## 44 84 **METHODS**

### 48 85 **Study design and population**

51 86 We studied adult patients ( $\geq 18$  years) with at least one biological product claim between 2016  
52  
53 87 and 2021, insured by Helsana Group, a major Swiss health insurer. (Table A1 in supplementary  
54  
55 88 file). The Helsana database covers 15% of Switzerland's population (1.2 million residents) and  
56  
57  
58  
59  
60

1  
2  
3 89 is regarded as representative, as prior research found minor differences between raw and  
4  
5 90 adjusted results [22, 23].  
6  
7

8 91 In Switzerland, medication reimbursement is governed by the Federal Law on Health Insurance,  
9  
10 92 which mandates that basic health insurance must cover the costs of essential medications.  
11  
12 93 Swissmedic regulates the market entry of medications, while the Federal Office of Public  
13  
14 94 Health oversees the establishment of the reimbursement list, which determines the extent to  
15  
16 95 which a medication is reimbursed. Switzerland's medication reimbursement system aims to  
17  
18 96 balance access to essential medications with cost control: To be eligible for reimbursement,  
19  
20 97 medications must demonstrate efficacy, safety, and cost-effectiveness compared to standard  
21  
22 98 treatments. As such, all of the biological products included in this study are presumed to have  
23  
24 99 fulfilled these requirements.  
25  
26  
27  
28  
29

## 30 100 **Measures**

31  
32  
33 101 The study included all patients who had at least one biosimilar available on the market at the  
34  
35 102 time of IP of a biologic product. This enabled us to explore the determinants of non-prescription  
36  
37 103 of biosimilars despite their availability. IP were defined for each patient as claims that were not  
38  
39 104 preceded by other prescriptions in the same medication category within the previous 24 months.  
40  
41 105 Prescriptions that followed within 12 months were labeled as “follow-up prescriptions” (FP).  
42  
43 106 By restricting the follow-up period to 12 months, we were able to focus on the medications that  
44  
45 107 were prescribed as a result of the initial prescription rather than medications that were  
46  
47 108 prescribed for unrelated reasons. This approach allowed us to evaluate the impact of the initial  
48  
49 109 prescription more accurately on subsequent medication use. We selected 117 biological  
50  
51 110 products approved by Swissmedic from a list (Table A1 in supplementary file) derived from  
52  
53 111 the Swiss Drug Compendium.  
54  
55  
56  
57  
58  
59  
60

1  
2  
3 112 We considered patient characteristics as covariates, including sex, age group (<50, 50-64, 65-  
4  
5 113 74, >74) and language region (German, French, Italian). We assessed comorbidity using the  
6  
7 114 number of Pharmaceutical Cost Groups (PCG) per patient (0,1,2,>2). PCGs are a recognized  
8  
9 115 proxy for the presence of chronic diseases using data on medications bills that were reimbursed  
10  
11 116 [24]. The Swiss healthcare system offers different cost-sharing options to patients, including  
12  
13 117 low (CHF 500, 1000) or high deductibles (i.e., CHF 1500, 2000, or 2500), and integrated care  
14  
15 118 models, which offer premium rebates in exchange for limited healthcare provider options. Thus,  
16  
17 119 having a low (CHF 500, 1000) or high deductible (i.e., CHF 1500, 2000, or 2500 vs. CHF 300),  
18  
19 120 and being enrolled in a managed care model were used in the analysis. Prescribed medications  
20  
21 121 were characterized by category (fusion proteins, hormones, monoclonal antibodies, low-  
22  
23 122 molecular-weight [LMW] heparins and growth factors), whether there were multiple packaging  
24  
25 123 sizes, the cost per package of the reference product (in CHF, <100, 100-599, >600), relative  
26  
27 124 price difference of the reference product to the corresponding biosimilar (<10, 10-19, >20), and  
28  
29 125 the number of available imitator drugs (1, 2, >2) at the date of prescription. The analysis adds  
30  
31 126 the aspect of healthcare provider by including information on the supply channel (general  
32  
33 127 practitioner, outpatient hospital, specialist, traditional pharmacy).  
34  
35 128 To ensure consistent terminology, we referred to all biologically manufactured drugs as  
36  
37 129 "biological products", while the originator drugs are referred to as "biologics" or as "reference  
38  
39 130 products", and imitator products as "biosimilars" throughout the manuscript.  
40  
41  
42  
43  
44  
45  
46  
47  
48

### 49 131 **Statistical analysis**

50  
51  
52 132 All statistical analysis were performed at the study population that consisted of individuals who  
53  
54 133 had at least one biosimilar available on the market at the time of IP of a biologic product. All  
55  
56 134 research participants' baseline characteristics are shown as counts and percentages, or as mean  
57  
58 135 and standard deviation for continuous variables. We compared patient characteristics for all  
59  
60



1  
2  
3 136 individuals with and without biosimilar IP. For bivariate comparisons between patients with  
4  
5 137 and without biosimilar IP, Fisher exact and Chi-Square tests were used accordingly. Statistical  
6  
7 138 significance was defined as a two-sided p-value of 0.05. We determined the biosimilar  
8  
9  
10 139 prevalence by distinguishing between IP and FP and the prevalence of biological therapy  
11  
12 140 switches (number of prescriptions and patients) for each year (2016-2021). Chi-squared tests  
13  
14 141 were used to determine whether the prevalence of biosimilars among all patients using a  
15  
16 142 biological product was equivalent across the years. To assess the determinants of biosimilar  
17  
18 143 prescriptions, we used logistic regression models in which the dependent variable was whether  
19  
20 144 a biosimilar was prescribed as IP (0 or 1). We employed three distinct logistic regression  
21  
22 145 models, each incorporating an additional set of variables, to comprehensively assess the impact  
23  
24 146 of various factors on our study outcomes (Table A8 in supplementary file). This approach  
25  
26 147 allows us to explore multiple dimensions of influence and gain a more nuanced understanding  
27  
28 148 of the relationships at play, enhancing the robustness and depth of our analysis. Both, Model B  
29  
30 149 (sociodemographic + medication variables) and C (sociodemographic + medication + provider  
31  
32 150 variables), show similar results and a better fit of the estimates compared to Model A  
33  
34 151 (sociodemographic variables) based on the goodness-of-fit criteria (AIC, BIC). For the  
35  
36 152 manuscript, we proceed with Model C because we are mainly interested in the associations with  
37  
38 153 biosimilar prescriptions from all three points of view (patient, medication, physician). Odds  
39  
40 154 ratios (OR) and corresponding 95% confidence intervals (CI) were calculated for each  
41  
42 155 regression coefficient. The success rate in the binomial model was denoted by the term  
43  
44 156 "occurrence" to improve the results' readability. All analyses were performed using R version  
45  
46 157 4.2.1.

### 158 **Patient and public involvement**

159 None.

## 160 RESULTS

161 This research was conducted using a study population comprising 68,310 individuals who  
 162 received at least one prescription for a biological or biosimilar medication between 2016 and  
 163 2021. For our study, we eliminated individuals who did not maintain continuous mandatory  
 164 health insurance coverage throughout the entire observation period. This exclusion was  
 165 implemented to mitigate potential bias in our regression analysis, resulting in a remaining  
 166 sample size of 53,379 patients. Within this subgroup, there were 18,953 instances of initial  
 167 prescriptions for biological medications that had a biosimilar alternative available at the time  
 168 of dispensing.

169 In the study sample we observed 18,953 first prescriptions of biological products. Patient  
 170 characteristics of the study population at the time of IP, stratified by type of IP (reference  
 171 product 81.5%, biosimilar 18.5%), are presented in Table 1. Female patients more frequently  
 172 received biosimilars than males (60.6%). The study's overall population demonstrated a  
 173 balanced distribution among age categories (<50, 50-64, 65-74, >74). Notably, individuals  
 174 prescribed reference products as IP were more prevalent in the highest age group, while those  
 175 initially prescribed biosimilars were more concentrated in the 50-64 and 65-74 age group. LMW  
 176 heparins were the most prescribed reference products (54.2%), with growth hormones  
 177 constituting the largest group of biosimilars (57.9%).

**Table 1.** Comparison of patient characteristics at IP between patients with reference product and biosimilar as IP

| Variables, n (%) | Total          | Patients with IP = Reference product | Patients with IP = Biosimilar | p-value |
|------------------|----------------|--------------------------------------|-------------------------------|---------|
| Observations     | 18,953         | 15,453 (81.5%)                       | 3500 (18.5%)                  |         |
| Sex              |                |                                      |                               |         |
| Male             | 7275 (38.4%)   | 5895 (38.1%)                         | 1380 (39.4%)                  | 1       |
| Female           | 11,678 (61.6%) | 9558 (61.9%)                         | 2120 (60.6%)                  | 1       |
| Age group        |                |                                      |                               | *** 2   |
| <50 years        | 5501 (29.0%)   | 4613 (29.9%)                         | 888 (25.4%)                   |         |
| 50-64 years      | 4720 (24.9%)   | 3764 (24.4%)                         | 956 (27.3%)                   |         |

|                                                |                |                |              |       |
|------------------------------------------------|----------------|----------------|--------------|-------|
| 65-74 years                                    | 3963 (20.9%)   | 3001 (19.4%)   | 962 (27.5%)  |       |
| >74 years                                      | 4769 (25.2%)   | 4075 (26.4%)   | 694 (19.8%)  |       |
| Language region                                |                |                |              | *** 2 |
| German                                         | 12,719 (67.1%) | 9958 (64.4%)   | 2761 (78.9%) |       |
| French                                         | 4324 (22.8%)   | 3777 (24.4%)   | 547 (15.6%)  |       |
| Italian                                        | 1910 (10.1%)   | 1718 (11.1%)   | 192 (5.5%)   |       |
| Number of comorbidities                        |                |                |              | ** 2  |
| 0                                              | 4738 (25.0%)   | 3901 (25.2%)   | 837 (23.9%)  |       |
| 1                                              | 3295 (17.4%)   | 2664 (17.2%)   | 631 (18.0%)  |       |
| 2                                              | 3072 (16.2%)   | 2448 (15.8%)   | 624 (17.8%)  |       |
| >2                                             | 7848 (41.4%)   | 6440 (41.7%)   | 1408 (40.2%) |       |
| Deductible                                     |                |                |              | *** 2 |
| Low                                            | 15,765 (83.2%) | 12,846 (83.1%) | 2919 (83.4%) |       |
| High                                           | 3188 (16.8%)   | 2607 (16.9%)   | 581 (16.6%)  |       |
| Managed care                                   | 11,921 (62.9%) | 9790 (63.4%)   | 2131 (60.9%) | ** 1  |
| Category                                       |                |                |              | *** 2 |
| Fusion proteins                                | 360 (1.9%)     | 178 (1.2%)     | 182 (5.2%)   |       |
| Hormones                                       | 2112 (11.1%)   | 1697 (11.0%)   | 415 (11.9%)  |       |
| Monoclonal antibodies                          | 2908 (15.3%)   | 2107 (13.6%)   | 801 (22.9%)  |       |
| LMW heparins                                   | 10,272 (54.2%) | 10,196 (66.0%) | 76 (2.2%)    |       |
| Growth factors                                 | 3301 (17.4%)   | 1275 (8.3%)    | 2026 (57.9%) |       |
| Multiple package size                          | 16,432 (86.7%) | 13,532 (87.6%) | 2900 (82.9%) | *** 2 |
| Cost per package of reference product (in CHF) |                |                |              | *** 2 |
| <100                                           | 9866 (52.1%)   | 9652 (62.5%)   | 214 (6.1%)   |       |
| 100-599                                        | 5066 (26.7%)   | 3179 (20.6%)   | 1887 (53.9%) |       |
| >600                                           | 4021 (21.2%)   | 2622 (17.0%)   | 1399 (40.0%) |       |
| Relative price difference (%)                  |                |                |              | *** 2 |
| <10                                            | 13,807 (72.8%) | 11,546 (74.7%) | 2261 (64.6%) |       |
| 10-19                                          | 2386 (12.6%)   | 1871 (12.1%)   | 515 (14.7%)  |       |
| >20                                            | 2760 (14.6%)   | 2036 (13.2%)   | 724 (20.7%)  |       |
| Number of available imitator drugs             |                |                |              | *** 2 |
| 0                                              | -              | -              | -            |       |
| 1                                              | 12,490 (65.9%) | 12,012 (77.7%) | 478 (13.7%)  |       |
| 2                                              | 2741 (14.5%)   | 1911 (12.4%)   | 830 (23.7%)  |       |
| >2                                             | 3722 (19.6%)   | 1530 (9.9%)    | 2192 (62.6%) |       |
| supply channel of first prescription           |                |                |              | *** 2 |
| General practitioner                           | 1185 (6.3%)    | 1097 (7.1%)    | 88 (2.5%)    |       |
| Outpatient hospital                            | 6224 (32.8%)   | 4359 (28.2%)   | 1865 (53.3%) |       |
| Specialist                                     | 3606 (19.0%)   | 2674 (17.3%)   | 932 (26.6%)  |       |
| Traditional pharmacy                           | 7564 (39.9%)   | 6981 (45.2%)   | 583 (16.7%)  |       |
| Rest                                           | 374 (2.0%)     | 342 (2.2%)     | 32 (0.9%)    |       |

<sup>1</sup>) Fisher exact test, <sup>2</sup>) Chi-Square test

Signif. codes: '\*\*\*' 0.001

178 Table 2 describes the overall frequency of biologicals products over the observation period  
 179 including the absolute and relative frequency of biosimilars in comparison to all biological  
 180 prescriptions. Of all biological products (IP and FP), 28.6% were biosimilar prescriptions. In  
 181 absolute values, the prescription rate of biosimilars increased over time (from 1016 in 2016 to  
 182 6976 in 2021). However, there is no discernible trend in the relative share of biosimilars in all  
 183 prescriptions of biological products (35.5% in 2016, 39.2% in 2017, 45.2% in 2018, 41.6% in  
 184 2019, 26.3% in 2020 and 22.5% in 2021). Furthermore, the share of biosimilars in FPs was  
 185 higher than in IPs in every year. The growth factor Filgrastim was the most frequently prescribed  
 186 active substance of biosimilars in IPs and FPs (53.1% and 36.2% respectively), while  
 187 enoxaparin was the most frequently prescribed active substance of reference products in IPs  
 188 and FPs (65.3% and 25.5%, respectively) (Table A2-A6 in supplementary file).

**Table 2.** All prescriptions for which a biosimilar was approved at the time of the prescription

|                            | total          | 2016         | 2017          | 2018          | 2019          | 2020          | 2021          |       |
|----------------------------|----------------|--------------|---------------|---------------|---------------|---------------|---------------|-------|
| <b>IP</b>                  |                |              |               |               |               |               |               |       |
| n                          | 18,953         | 815          | 888           | 1037          | 1520          | 5313          | 9380          |       |
| Biosimilars<br>(n, % of N) | 3500 (18.5%)   | 262 (32.1%)  | 343 (38.6%)   | 391 (37.7%)   | 612 (40.3%)   | 813 (15.3%)   | 1079 (11.5%)  | *** 1 |
| <b>FP</b>                  |                |              |               |               |               |               |               |       |
| n                          | 50,251         | 2047         | 2716          | 3314          | 6306          | 14,288        | 21,580        |       |
| Biosimilar<br>(n, % of N)  | 16,293 (32.4%) | 754 (36.8%)  | 1071 (39.4%)  | 1578 (47.6%)  | 2644 (41.9%)  | 4349 (30.4%)  | 5897 (27.3%)  | *** 1 |
| <b>Total (FP+IP)</b>       |                |              |               |               |               |               |               |       |
| n                          | 69,204         | 2862         | 3604          | 4351          | 7826          | 19,601        | 30,960        |       |
| Biosimilars<br>(n, % of N) | 19,793 (28.6%) | 1016 (35.5%) | 1414 (39.23%) | 1969 (45.25%) | 3256 (41.60%) | 5162 (26.34%) | 6976 (22.53%) | *** 1 |

Chi-Square test, Signif. codes: '\*\*\*' <0.001

189 Of the study population, only a small subset (n=1492, 8.5%) experienced at least one  
 190 medication switch (Table 3). Most patients had switches between reference products (n=867,  
 191 58.1%), followed by switches from reference product to biosimilar (n=331, 22.2%), from  
 192 biosimilar to reference product (n=297, 19.9%) and switches between biosimilars (n=286,  
 193 19.2%). The number of patients with at least one switch increased between 2016 and 2021

194 (from 28 to 662), whereby the numbers of patients with switches between reference products  
 195 increased most prominently (from 25.0% in 2016 to 62.1% in 2021). Switches between  
 196 reference products and between biosimilars occurred most often for Enoxaparin and Rituximab,  
 197 respectively (Table A7 in supplementary file). The most common switches from reference  
 198 product to biosimilar and from biosimilar to reference products were most often observed for  
 199 Filgrastim and Enoxaparin.

**Table 3.** Patients with biologic therapy switches

| Switches, n=patients                    | Total       | 2016       | 2017       | 2018       | 2019        | 2020        | 2021        | p-value |
|-----------------------------------------|-------------|------------|------------|------------|-------------|-------------|-------------|---------|
| At least one, n                         | 1492        | 28         | 42         | 77         | 249         | 434         | 662         |         |
| Reference Prod to Reference Prod, n (%) | 867 (58.1%) | 7 (25.0%)  | 15 (35.7%) | 37 (48.1%) | 146 (58.6%) | 251 (57.8%) | 411 (62.1%) | ***1    |
| Biosimilar to Biosimilar, n (%)         | 286 (19.2%) | 9 (32.1%)  | 10 (23.8%) | 14 (18.2%) | 51 (20.5%)  | 74 (17.1%)  | 128 (19.3%) | 1       |
| Reference Prod to Biosimilar, n (%)     | 331 (22.2%) | 6 (21.4%)  | 11 (26.2%) | 21 (27.3%) | 60 (24.1%)  | 103 (23.7%) | 130 (19.6%) | 1       |
| Biosimilar to Reference Prod, n (%)     | 297 (19.9%) | 10 (35.7%) | 8 (19.0%)  | 15 (19.5%) | 49 (19.7%)  | 96 (22.1%)  | 119 (18.0%) | 1       |

Chi-Square test  
 Signif. codes: '\*\*\*' <0.001

200 As far as the regression results are concerned, the odds of prescribing biosimilars at IP have  
 201 been increasing over the years (Fig.1, Table A8 in supplementary file). Male sex was associated  
 202 with 13.2% higher odds of receiving biosimilar IP, whereas residence in a French or Italian-  
 203 speaking region had a 38.9% and 23.9%, respectively, lower occurrence of a biosimilar IP.  
 204 None of the insurance-related variables showed a significant association with biosimilars IPs.  
 205 In terms of pharmaceutical variables, monoclonal antibodies, LMW heparins and growth  
 206 factors were associated with substantially lower biosimilar IP occurrences (-88.5%, -99.9% and  
 207 -84.2%) than fusion proteins. The availability of multiple packaging sizes was associated with  
 208 4.6-fold higher odds of biosimilar IP compared to medications with solely one packaging size.  
 209 For the absolute package price, no consistent pattern was observed, as medications with prices

1  
2  
3 210 between 100 and 599 francs per pack decreased the odds by 79.8% compared to the baseline  
4  
5 211 (<100 CHF), whereas the odds in the highest prize category (>600 CHF) were lower by 34.3%.  
6  
7 212 However, compared to products with a <10% price difference between reference product and  
8  
9 213 biosimilar, higher price reductions were associated with decreased occurrence of biosimilar IP:  
10  
11 214 medications with 10-19% price difference had 92.4% lower odds and medications with more  
12  
13 215 than 20% had even 93.3% lower odds. On the contrary, increasing the number of available  
14  
15 216 imitator medications of prescription (2 and >2) had substantially higher (2.36-fold and 9.65-  
16  
17 217 fold) odds of biosimilar IP compared to prescriptions with only one available biosimilar. As far  
18  
19 218 as provider variables are concerned, physicians in the outpatient hospital setting prescribed far  
20  
21 219 more biosimilars compared to general practitioners (2.48-fold higher odds). The occurrence of  
22  
23 220 biosimilar IP was also 41.7% higher in patients who had been prescribed biological products  
24  
25 221 by a specialist than in patients who had received the equivalent medications from a general  
26  
27 222 practitioner.  
28  
29  
30  
31  
32  
33  
34

## 35 223 **DISCUSSION**

36  
37  
38 224 The increase in biosimilar prescriptions over time can be attributed to the growing biosimilar  
39  
40 225 market. With 15 approved biosimilars in 2016, this market has expanded significantly, reaching  
41  
42 226 78 biosimilars in 2021 (Table A1 in supplementary file) [8, 21]. A longer time on the market  
43  
44 227 gives the biosimilar a better chance to establish itself and gain market share. Despite this  
45  
46 228 growth, the biosimilars' claims in Switzerland remained relatively low. In 2021, claims for  
47  
48 229 reference products were four times higher than claims for biosimilars among all available  
49  
50 230 biological products with biosimilars. [8]. Comparatively, other countries like Norway have  
51  
52 231 achieved 80% biosimilar quota of all biologic products[25], while in Germany, studies reported  
53  
54 232 an average biosimilar ratio between 40.5% and 51.9% in 2019[26, 27]. In the present study we  
55  
56 233 observed substantially lower average biosimilar quota of 28.0%. Infliximab is a particularly  
57  
58  
59  
60

1  
2  
3 234 compelling example, with the biosimilar share reaching 26% in Germany after only 12 months  
4  
5 235 on the market (2017) and rising to 64-68% of the biosimilar market in 2019. By contrast,  
6  
7 236 infliximab achieved a market share of only 22% in Switzerland in 2019 [8].  
8  
9  
10 237 The low biosimilar market share in Switzerland can be attributed to several factors, including  
11  
12 238 physician and patient knowledge deficits regarding biosimilars, leading to reluctance in their  
13  
14 239 use [12–15]. According to survey studies [20, 28–31], negative perceptions of biosimilars  
15  
16 240 among 15-30% of the population may be rooted in concerns about the evidence base for their  
17  
18 241 efficacy and safety, primarily requiring bioequivalence for approval.. However, there is  
19  
20 242 increasing evidence of equivalent safety and efficacy of biosimilars, along with evidence of  
21  
22 243 bioequivalence [32–34]. Furthermore, a challenge for newly approved biosimilars is the  
23  
24 244 difficulty in extending conclusions from RCTs to the broader population that will use the  
25  
26 245 biosimilar. This is because RCTs typically enroll a more homogeneous population, and certain  
27  
28 246 patient groups, such as pediatric, elderly, and comorbid populations, as well as patients with  
29  
30 247 polypharmacy, are often underrepresented in these trials [35–37]. As a result, prescribers may  
31  
32 248 be skeptical about the use of biosimilars in these patient populations because of the lack of data.  
33  
34 249 Moreover, the finding that patients frequently switch from biosimilar to reference products  
35  
36 250 underscores the complex landscape surrounding biosimilar utilization. This phenomenon may,  
37  
38 251 in part, be influenced by the current incentive system discourages the prescription of biosimilars  
39  
40 252 for self-dispensing doctors and pharmacies as they are rewarded with larger profit margins for  
41  
42 253 prescribing the more expensive products [8]. Conversely, under a capitation payment model,  
43  
44 254 managed care physicians may have a financial incentive to prescribe lower-cost biosimilars in  
45  
46 255 order to maximize profits. However, if physicians are not properly educated about the safety  
47  
48 256 and efficacy of biosimilars, they may be hesitant to prescribe them.  
49  
50 257 That only a small subset (n=1492, 8.5%) experienced at least one medication switch can be  
51  
52 258 explained by the reluctance of patients to switch to a biosimilar medication due to the fear of  
53  
54  
55  
56  
57  
58  
59  
60

1  
2  
3 259 experiencing new and unknown side effects. Patients who have been using a particular  
4  
5 260 medication for a long time and have become accustomed to its efficacy and safety profile may  
6  
7 261 be hesitant to switch to a biosimilar, which they perceive as being different and possibly  
8  
9 262 inferior. Nevertheless, efficacy of biosimilar switching has been observed [8, 32–34, 38, 39].  
10  
11 263 According to a systematic literature review based on 90 published studies, the great majority of  
12  
13 264 the publications did not report differences in immunogenicity, safety, or efficacy when patients  
14  
15 265 switched to biosimilars. Three large studies did not show differences in efficacy or safety after  
16  
17 266 multiple switches between reference product and biosimilar [40–42]. Only two publications  
18  
19 267 reported a loss of efficacy or increased dropout rates [43, 44]. Often, this very knowledge and  
20  
21 268 awareness about the safety and efficacy of switching to new treatment options lack for  
22  
23 269 prescribing physicians who rely on solid, evidence-based data to make treatment decisions [45–  
24  
25 270 47]. The substantial transition from biosimilars to reference products observed in our study  
26  
27 271 warrants discussion. While our analysis didn't delve into the specific drivers behind this shift,  
28  
29 272 several factors may contribute to it. These could encompass the beforementioned patient and  
30  
31 273 physician preferences. Further exploration of these factors is essential to gain a comprehensive  
32  
33 274 understanding of the dynamics between biosimilars and reference products in clinical practice,  
34  
35 275 shedding light on the implications for healthcare stakeholders and policymakers.  
36  
37 276 The regression results revealed that biosimilar IP rates were lower in French-speaking cantons.  
38  
39 277 These regional variations may be caused by a variety of variables, including a higher  
40  
41 278 concentration of medical services in urban regions, various patient characteristics, and cultural  
42  
43 279 variations between cantons [48, 49]. Our findings showed that biosimilars with high relative  
44  
45 280 price difference to reference product were less likely prescribed. Several factors contribute to  
46  
47 281 physicians' reduced prescription rates in association with the lower prices of biosimilars. A  
48  
49 282 possible explanation is that healthcare providers may have less experience with biosimilars with  
50  
51 283 a higher price difference or may perceive them as less established and less proven than  
52  
53  
54  
55  
56  
57  
58  
59  
60



1  
2  
3 284 biosimilars with a lower price difference. This lack of familiarity or perceived risk may  
4  
5 285 contribute to reluctance in prescribing biosimilars with a higher price difference. It is also  
6  
7  
8 286 important to consider the role of financial incentives and reimbursement policies in biosimilar  
9  
10 287 prescribing: Currently, dispensation channels receive a larger profit margin when distributing  
11  
12 288 the more expensive reference product under the present price-dependent margin [21]. This  
13  
14 289 incentive system seems to be characteristic for Switzerland, as studies conducted in European  
15  
16 290 countries did not find a relationship between price difference and biosimilar dissemination [50–  
17  
18 291 52]. This might be attributed to several factors that differentiate Switzerland from other  
19  
20 292 European countries: Cantonal differences in self-dispensing regulation, the country's different  
21  
22 293 prescribing cultures and guidelines across its language regions, and capitation is implemented  
23  
24 294 only in relatively few cases in Switzerland. In our analysis, male patients had more biosimilar  
25  
26 295 IP. According to studies, women were often more skeptical of imitator drugs [28, 53–56] and  
27  
28 296 they more frequently believe that they are more responsive to medications than men [57–59].  
29  
30 297 This can have an impact on their confidence in biosimilars, making female patients more aware  
31  
32 298 of potential side effects or lack thereof. Biosimilar IPs were prescribed more frequently for  
33  
34 299 fusion proteins compared to other categories which indicates an increased acceptance of  
35  
36 300 imitator products in this drug class. This is supported by the relatively early market entry (2018)  
37  
38 301 and by a meta-analysis showing comparable results in terms of efficacy and safety between  
39  
40 302 reference product and biosimilars [60]. The strongest facilitator of biosimilar prescriptions was  
41  
42 303 the amount of available biosimilars, which is in line with the findings of a prior study [50, 61].  
43  
44 304 Thus, the replacement of reference products by biosimilars seems to be better accepted in  
45  
46 305 market segments with many imitator products. This finding is probably associated with the  
47  
48 306 larger collective promotional effort from multiple players involved in the field to favor  
49  
50 307 biosimilars; it is noteworthy that the largest adoption of biosimilars (Filgrastim) has been  
51  
52 308 partially attributable to the fact that numerous biosimilar producers have commercialized  
53  
54  
55  
56  
57  
58  
59  
60

1  
2  
3 309 different products, whereas there is only one company branding the reference product [62]. We  
4  
5 310 found more biosimilar IPs for specialists and outpatient hospital physicians than GP. These  
6  
7 311 findings are in line with existing literature that showed more biosimilars from specialists who  
8  
9 312 reported a higher confidence in the comparability of biosimilars than GPs [63, 64]. Differences  
10  
11 313 in care providers may be due to a variety of reasons: some healthcare providers may not be  
12  
13 314 interested in stockpiling too many different medications and additional biosimilars, as they  
14  
15 315 sometimes have large storage requirements (cooling, expiration date) and , thus, are associated  
16  
17 316 with a significant financial risk [21]. In addition, it has been demonstrated that the dissemination  
18  
19 317 of knowledge about new prescription options is heterogeneous because there are large learning  
20  
21 318 costs associated with the treatment effects of new therapy options, which rely on the training  
22  
23 319 and experience of the doctor [65]. Despite the fact that a previous study conducted in the context  
24  
25 320 of generic drugs showed that older people are less likely to use imitator products when offered  
26  
27 321 a choice [28, 61], we did not observe an age-dependency of biosimilar prescriptions.  
28  
29 322 The most valuable strength of this study is the extensive dataset of biosimilar prescriptions and  
30  
31 323 potential influencing factors including sociodemographic, pharmaceutical and healthcare  
32  
33 324 provider variables that were gathered from a representative sample of the Swiss population.  
34  
35 325 Hence, earlier research has suggested that this database can be considered reasonably  
36  
37 326 representative of the broader Swiss population, given that the findings revealed only minimal  
38  
39 327 disparities between unadjusted and adjusted results. The main limitation is the dearth of clinical  
40  
41 328 data in our database (e.g., disease severity, clinical diagnosis, and reason for biosimilar  
42  
43 329 utilization). However, we attempted to mitigate this by utilizing comorbidity measures based  
44  
45 330 on reimbursed prescriptions to control for potential confounders. Furthermore, it is possible that  
46  
47 331 invoices from individuals whose annual healthcare expenses did not surpass the annual  
48  
49 332 deductible were not included in the analysis. Nevertheless, internal analyses conducted by  
50  
51 333 Helsana indicated that this proportion accounts for approximately 1.5% of invoices, suggesting  
52  
53  
54  
55  
56  
57  
58  
59  
60

1  
2  
3 334 that any potential selection bias is likely minimal. Another limitation of our study is that the  
4  
5 335 follow-up period for the prescriptions was limited to 12 months. This time frame may have led  
6  
7 336 to the exclusion of some prescriptions, potentially introducing bias into our results.  
8  
9  
10 337 Nevertheless, we observed that a significant number of patients (7608, which accounts for  
11  
12 338 43.1% of the total) were given only one prescription, indicating that any bias arising from this  
13  
14 339 limitation is expected to be insignificant.

16  
17 340 It is worth noting that the actual biosimilars quota (proportion of biosimilars claims relative to  
18  
19 341 overall biological product claims), is lower in reality as there are biological products for  
20  
21 342 which no corresponding biosimilars are available on the market. Nevertheless, even when  
22  
23 343 considering this relatively higher observed quota, it remains comparatively low compared to  
24  
25 344 other EU countries. This has important implications for the adoption and utilization of these  
26  
27 345 products in Switzerland. Patients and physicians should be better and objectively informed  
28  
29 346 about biosimilars in order to increase the acceptance [47, 48]. Also, for example, a clear and  
30  
31 347 conspicuous indication of the prescribed active substance on the medication package for both  
32  
33 348 the reference product and the imitator drug, for instance, could enhance patient confidence  
34  
35 349 [42]. To address the perceived uncertainty and mistrust in imitator products, the evidence base  
36  
37 350 should be further strengthened: direct evidence to help explain some of the practical aspects  
38  
39 351 related to the use of biosimilars can be provided by retrospective studies, national databases  
40  
41 352 and registries that track the long-term immunogenicity and safety of biosimilars [66–71]. In  
42  
43 353 addition, the incentive system for healthcare providers seems to be designed in such a way  
44  
45 354 that fewer biosimilars are prescribed. Thus, these incentives should be eliminated, for  
46  
47 355 example by introducing a fixed margin that always remunerates the medication supplier the  
48  
49 356 same regardless of the prescribed product (reference product or biosimilar). In order to exploit  
50  
51 357 the cost saving potential of biosimilars, the aforementioned measures should be targeted to  
52  
53 358 biosimilars with a noticeable price difference compared to their reference products, and that  
54  
55  
56  
57  
58  
59  
60

1  
2  
3 359 still possess relatively low biosimilar market share. Taking into account the findings  
4  
5 360 presented in Table A6 (in supplementary file), notable examples of these biosimilars include  
6  
7 361 bevacizumab, follitropin alfa, and pegfilgrastim.  
8  
9  
10 362 However, the decision to prescribe an imitator drug should not merely be motivated by the  
11  
12 363 cost-saving potential but should ensure appropriate health care provision for the patients.  
13  
14 364 Therefore, it is crucial for healthcare providers to engage in shared-decision making with their  
15  
16 365 patients to determine the most appropriate treatment option based on their individual medical  
17  
18 366 situation.  
19  
20  
21  
22

## 23 367 **CONCLUSION**

24  
25  
26 368 Despite an increase of available biosimilars in Switzerland between 2016 and 2021, the  
27  
28 369 biosimilars market share remained relatively low over time. In addition, biological therapy  
29  
30 370 switches were rarely observed, highlighting the importance of IPs. Our study suggests that  
31  
32 371 greater acceptance and higher utilization of biosimilars may be associated with the availability  
33  
34 372 of different package sizes and lower price differences between biosimilars and their reference  
35  
36 373 products. Patients and providers should be informed about biosimilars in a timely and  
37  
38 374 appropriate manner, and outdated incentive structures have to be changed to increase the use of  
39  
40  
41  
42 375 biosimilars.  
43  
44  
45  
46

47 \*\*\* \*\*

48  
49  
50  
51  
52 376 **Funding** This research received no specific grant from any funding agency in the public,  
53  
54 377 commercial or not-for-profit sectors  
55  
56  
57  
58  
59  
60

1  
2  
3 378 **Competing interests** The authors declare that they have no conflicts of interest. Helsana Group  
4  
5 379 provided support in the form of salaries for authors (KM, MN, CH, EB), without having any  
6  
7 380 additional role in the study design, data collection and analysis, decision to publish, or  
8  
9 381 preparation of the manuscript.  
10  
11  
12  
13

14 382 **Contributors** KW, MN and CH designed the study. MN did data preparation and data  
15  
16 383 management. MN and KW performed the statistical analyses, with the contribution of SB, CH  
17  
18 384 and EB. KW drafted the main manuscript text. All authors assisted in the interpretation of the  
19  
20 385 results and critically revised the manuscript. All authors have read and approved the manuscript.  
21  
22  
23  
24  
25

26 386 **Data availability statement** Helsana provides the data that support up the findings of this  
27  
28 387 research. (<https://www.helsana.ch/en/helsana-group>). These data, which were used under  
29  
30 388 license for the present study and are not accessible to the general public, are subject to  
31  
32 389 restrictions. But with Helsana's consent and upon reasonable request, data are available from  
33  
34 390 the authors ([gesundheitskompetenz@helsana.ch](mailto:gesundheitskompetenz@helsana.ch)).  
35  
36  
37  
38  
39

40 **Ethics approval** The data used in this study were retrospective, pre-existing, de-identified, and  
41  
42 anonymous in accordance with privacy laws and regulations. This study was free from the  
43  
44 provisions of the Swiss Federal Law on Human Research because it used retrospective, de-  
45  
46 identified, and anonymized data (Humanforschungsgesetz) [72] and was thus exempted from  
47  
48 receiving clearance from the regional ethics committee (the ethical committee of the Canton of  
49  
50 Zurich) as well as from obtaining the patients' informed consent.  
51  
52  
53  
54  
55  
56  
57  
58  
59  
60

391 **References**

- 392 1. Doughman E. Number of drugs in global R&D pipeline projected to reach record high in  
393 2019. 2019. [https://www.rdmag.com/article/2019/05/number-drugs-global-r-d-pipeline-](https://www.rdmag.com/article/2019/05/number-drugs-global-r-d-pipeline-projected-reach-record-high-2019)  
394 [projected-reach-record-high-2019](https://www.rdmag.com/article/2019/05/number-drugs-global-r-d-pipeline-projected-reach-record-high-2019).
- 395 2. Walsh G. Biopharmaceutical benchmarks 2018. *Nature Biotechnology*. 2018;36:1136–45.  
396 doi:10.1038/nbt.4305.
- 397 3. Farhat F, Torres A, Park W, Lima Lopes G de, Mudad R, Ikpeazu C, Abi Aad S. The  
398 Concept of Biosimilars: From Characterization to Evolution-A Narrative Review.  
399 *Oncologist*. 2018;23:346–52. doi:10.1634/theoncologist.2017-0126.
- 400 4. Kresse G-B. Biosimilars--science, status, and strategic perspective. *Eur J Pharm*  
401 *Biopharm*. 2009;72:479–86. doi:10.1016/j.ejpb.2009.02.014.
- 402 5. FDA. Biosimilar and interchangeable products. 2019.  
403 <http://www.fda.gov/drugs/biosimilars/biosimilar-and-inter-changeable-products>.
- 404 6. Interpharma. Positionspapier zu Biosimilars. 2013.  
405 [https://www.interpharma.ch/sites/default/files/positionspa-pier\\_biosimilars\\_juni-](https://www.interpharma.ch/sites/default/files/positionspa-pier_biosimilars_juni-2013.pdf)  
406 [2013.pdf](https://www.interpharma.ch/sites/default/files/positionspa-pier_biosimilars_juni-2013.pdf).
- 407 7. Maksabedian Hernandez EJ, Graf M, Portelli A, Shafrin J. Estimating the impact of  
408 biosimilar entry on prices and expenditures in rheumatoid arthritis: a case study of  
409 targeted immune modulators. *Journal of Medical Economics*. 2022;25:1118–26.  
410 doi:10.1080/13696998.2022.2113252.
- 411 8. Schur N., Twerenbold S., Reinau D., Schwenkglens M., Meier C.R. Helsana-  
412 Arzneimittelreport für die Schweiz 2020. 2020. [https://www.helsana.ch/de/helsana-](https://www.helsana.ch/de/helsana-gruppe/medien-publikationen/helsana-reports/arszneimittelreport.html)  
413 [gruppe/medien-publikationen/helsana-reports/arszneimittelreport.html](https://www.helsana.ch/de/helsana-gruppe/medien-publikationen/helsana-reports/arszneimittelreport.html).
- 414 9. Schur N., Twerenbold S., Reinau D., Schwenkglens M., Meier C.R. Helsana-  
415 Arzneimittelreport für die Schweiz 2017. 2017. [https://www.helsana.ch/de/helsana-](https://www.helsana.ch/de/helsana-gruppe/medien-publikationen/helsana-reports/arszneimittelreport.html)  
416 [gruppe/medien-publikationen/helsana-reports/arszneimittelreport.html](https://www.helsana.ch/de/helsana-gruppe/medien-publikationen/helsana-reports/arszneimittelreport.html).
- 417 10. GaBI Journal Editor, GaBI Online Editor. Patent expiry dates for biologicals: 2017  
418 update. *GaBI Journal*. 2017:29–35.
- 419 11. EMA. European Medicines Agency. 2019. <https://www.ema.europa.eu/en>.
- 420 12. Frantzen L, Cohen J-D, Tropé S, Beck M, Munos A, Sittler M-A, et al. Patients'  
421 information and perspectives on biosimilars in rheumatology: A French nation-wide  
422 survey. *Joint Bone Spine*. 2019;86:491–6. doi:10.1016/j.jbspin.2019.01.001.
- 423 13. Halimi V, Daci A, Ancevska Netkovska K, Suturkova L, Babar Z-U-D, Grozdanova A.  
424 Clinical and Regulatory Concerns of Biosimilars: A Review of Literature. *Int J Environ*  
425 *Res Public Health* 2020. doi:10.3390/ijerph17165800.
- 426 14. Armuzzi A, Avedano L, Greveson K, Kang T. Nurses are Critical in Aiding Patients  
427 Transitioning to Biosimilars in Inflammatory Bowel Disease: Education and  
428 Communication Strategies. *J Crohns Colitis*. 2019;13:259–66. doi:10.1093/ecco-  
429 [jcc/jjy150](https://doi.org/10.1093/ecco-jcc/jjy150).
- 430 15. Leonard E, Wascovich M, Oskouei S, Gurz P, Carpenter D. Factors Affecting Health  
431 Care Provider Knowledge and Acceptance of Biosimilar Medicines: A Systematic  
432 Review. *J Manag Care Spec Pharm*. 2019;25:102–12. doi:10.18553/jmcp.2019.25.1.102.
- 433 16. Rathe J, Andersen M, Jarbøl DE, dePont Christensen R, Hallas J, Søndergaard J. Generic  
434 switching and non-persistence among medicine users: a combined population-based  
435 questionnaire and register study. *PLoS One*. 2015;10:e0119688.  
436 doi:10.1371/journal.pone.0119688.
- 437 17. Rathe J, Larsen P, Andersen M, Paulsen M, Jarbøl D, Thomsen J, Søndergaard J.  
438 Associations between generic substitution and patients' attitudes, beliefs and experiences.  
439 *Eur J Clin Pharmacol*. 2013;69:1827–36. doi:10.1007/s00228-013-1539-z.

- 1  
2  
3 440 18. Cohen HP, Blauvelt A, Rifkin RM, Danese S, Gokhale SB, Woollett G. Switching  
4 441 Reference Medicines to Biosimilars: A Systematic Literature Review of Clinical  
5 442 Outcomes. *Drugs*. 2018;78:463–78. doi:10.1007/s40265-018-0881-y.
- 6 443 19. Coady D, Parkin L, Fairle L, Smith A. P123 Switching to biosimilars: what do patients  
7 444 think? *Rheumatology*. 2022;61:keac133.122. doi:10.1093/rheumatology/keac133.122.
- 8 445 20. Rathe J, Larsen P, Andersen M, Paulsen M, Jarbøl D, Thomsen J, Soendergaard J.  
9 446 Associations between generic substitution and patients' attitudes, beliefs and experiences.  
10 447 *Eur J Clin Pharmacol*. 2013;69:1827–36. doi:10.1007/s00228-013-1539-z.
- 11 448 21. Irene Kobler, Golda Lenzin, Florian Liberatore, Johannes Pöhlmann, Marion Schmidt,  
12 449 Simon Wieser. Biosimilars in der Schweiz: Medizin gegen die steigenden  
13 450 Gesundheitskosten? 2020.
- 14 451 22. Haller E, Watzke B, Blozik E, Rosemann T, Reich O, Huber CA, Wolf M. Antidepressant  
15 452 prescription practice and related factors in Switzerland: a cross-sectional analysis of  
16 453 health claims data. *BMC Psychiatry*. 2019;19:196. doi:10.1186/s12888-019-2178-4.
- 17 454 23. Huber CA, Schwenkglens M, Rapold R, Reich O. Epidemiology and costs of diabetes  
18 455 mellitus in Switzerland: an analysis of health care claims data, 2006 and 2011. *BMC*  
19 456 *Endocrine Disorders*. 2014;14:44. doi:10.1186/1472-6823-14-44.
- 20 457 24. Huber CA, Szucs TD, Rapold R, Reich O. Identifying patients with chronic conditions  
21 458 using pharmacy data in Switzerland: an updated mapping approach to the classification of  
22 459 medications. *BMC Public Health*. 2013;13:1030. doi:10.1186/1471-2458-13-1030.
- 23 460 25. EY. Global biosimilar policy comparison. 2017. [https://docplayer.net/100090337-Global-](https://docplayer.net/100090337-Global-biosimilar-policy-comparison-overview-of-biosimilar-policies-across-nine-major-markets-in-the-battle-to-control-health-care-sustainability.html)  
24 461 [biosimilar-policy-comparison-overview-of-biosimilar-policies-across-nine-major-](https://docplayer.net/100090337-Global-biosimilar-policy-comparison-overview-of-biosimilar-policies-across-nine-major-markets-in-the-battle-to-control-health-care-sustainability.html)  
25 462 [markets-in-the-battle-to-control-health-care-sustainability.html](https://docplayer.net/100090337-Global-biosimilar-policy-comparison-overview-of-biosimilar-policies-across-nine-major-markets-in-the-battle-to-control-health-care-sustainability.html).
- 26 463 26. Daniel Grandt, Veronika Lappe, Ingrid Schubert. BARMER Arzneimittelreport. 2021.
- 27 464 27. Pro Biosimilars. Biosimilars in Zahlen 2019: Wie Biosimilars die deutsche  
28 465 Versorgungslandschaft verändern. 2019.  
29 466 [https://probiosimilars.de/app/uploads/2022/06/Biosimilars-in-Zahlen-2019\\_DS.pdf](https://probiosimilars.de/app/uploads/2022/06/Biosimilars-in-Zahlen-2019_DS.pdf).  
30 467 Accessed 11 Oct 2022.
- 31 468 28. Shrank WH, Cox ER, Fischer MA, Mehta J, Choudhry NK. Patients' perceptions of  
32 469 generic medications. *Health Aff (Millwood)*. 2009;28:546–56.  
33 470 doi:10.1377/hlthaff.28.2.546.
- 34 471 29. Himmel W, Simmenroth-Nayda A, Niebling W, Ledig T, Jansen RD, Kochen MM, et al.  
35 472 What do primary care patients think about generic drugs? *Int J Clin Pharmacol Ther*.  
36 473 2005;43:472–9. doi:10.5414/cpp43472.
- 37 474 30. Kjoenniksen I, Lindbaek M, Granas AG. Patients' attitudes towards and experiences of  
38 475 generic drug substitution in Norway. *Pharm World Sci*. 2006;28:284–9.  
39 476 doi:10.1007/s11096-006-9043-5.
- 40 477 31. Daly MJ, Guignard B, Nendaz M. Generic and biosimilar drug substitution: a panacea?  
41 478 [Médicaments génériques et biosimilaires: une panacée?]. *Rev Med Suisse*.  
42 479 2015;11:1909-12, 1914.
- 43 480 32. Cesaro S, Tintori V, Nesi F, Schiavello E, Calore E, Dallorso S, et al. A prospective study  
44 481 on the efficacy of mobilization of autologous peripheral stem cells in pediatric  
45 482 oncohematology patients. *Transfusion*. 2013;53:1501–9. doi:10.1111/j.1537-  
46 483 2995.2012.03911.x.
- 47 484 33. Manko J, Walter-Croneck A, Jawniak D, Grzasko N, Gorska-Kosicka M, Cioch M,  
48 485 Dmoszynska A. A clinical comparison of the efficacy and safety of biosimilar G-CSF and  
49 486 originator G-CSF in haematopoietic stem cell mobilization. *Pharmacol Rep*.  
50 487 2014;66:239–42. doi:10.1016/j.pharep.2013.09.005.
- 51 488 34. Michallet M, Luporsi E, Soubeyran P, Amar NA, Boulanger V, Carreiro M, et al.  
52 489 BiOsimilaRs in the management of anaemia secondary to chemotherapy in HaEmatology

- 1  
2  
3 490 and Oncology: results of the ORHEO observational study. *BMC Cancer*. 2014;14:503.  
4 491 doi:10.1186/1471-2407-14-503.
- 5 492 35. Mysler E, Azevedo VF, Danese S, Alvarez D, Iikuni N, Ingram B, et al. Biosimilar-to-  
6 493 Biosimilar Switching: What is the Rationale and Current Experience? *Drugs*.  
7 494 2021;81:1859–79. doi:10.1007/s40265-021-01610-1.
- 8 495 36. Moots R, Azevedo V, Coindreau JL, Dörner T, Mahgoub E, Mysler E, et al. Switching  
9 496 Between Reference Biologics and Biosimilars for the Treatment of Rheumatology,  
10 497 Gastroenterology, and Dermatology Inflammatory Conditions: Considerations for the  
11 498 Clinician. *Curr Rheumatol Rep*. 2017;19:37. doi:10.1007/s11926-017-0658-4.
- 12 499 37. Danese S, Fiorino G, Raine T, Ferrante M, Kemp K, Kierkus J, et al. ECCO Position  
13 500 Statement on the Use of Biosimilars for Inflammatory Bowel Disease-An Update. *J*  
14 501 *Crohns Colitis*. 2017;11:26–34. doi:10.1093/ecco-jcc/jjw198.
- 15 502 38. Cohen HP, Blauvelt A, Rifkin RM, Danese S, Gokhale SB, Woollett G. Switching  
16 503 Reference Medicines to Biosimilars: A Systematic Literature Review of Clinical  
17 504 Outcomes. *Drugs*. 2018;78:463–78. doi:10.1007/s40265-018-0881-y.
- 18 505 39. Håkonsen H, Eilertsen M, Borge H, Toverud E-L. Generic substitution: additional  
19 506 challenge for adherence in hypertensive patients? *Curr Med Res Opin*. 2009;25:2515–21.  
20 507 doi:10.1185/03007990903192223.
- 21 508 40. Blackwell K, Semiglazov V, Krasnozhon D, Davidenko I, Nelyubina L, Nakov R, et al.  
22 509 Comparison of EP2006, a filgrastim biosimilar, to the reference: a phase III, randomized,  
23 510 double-blind clinical study in the prevention of severe neutropenia in patients with breast  
24 511 cancer receiving myelosuppressive chemotherapy. *Ann Oncol*. 2015;26:1948–53.  
25 512 doi:10.1093/annonc/mdv281.
- 26 513 41. Blauvelt A, Lacour J-P, Fowler JF, Schuck E, Jauch-Lembach J, editor. A phase III  
27 514 confirmatory study comparing GP2017 with reference adalimumab in patients with  
28 515 moderate-to-severe chronic plaque psoriasis: 51 week results from the ADACCESS study;  
29 516 2017.
- 30 517 42. Griffiths CEM, Thaçi D, Gerdes S, Arenberger P, Pulka G, Kingo K, et al. The  
31 518 EGALITY study: a confirmatory, randomized, double-blind study comparing the  
32 519 efficacy, safety and immunogenicity of GP2015, a proposed etanercept biosimilar, vs. the  
33 520 originator product in patients with moderate-to-severe chronic plaque-type psoriasis. *Br J*  
34 521 *Dermatol*. 2017;176:928–38. doi:10.1111/bjd.15152.
- 35 522 43. Yazici Y, Xie L, Ogbomo A, Parenti D, Goyal K, Teeple A. A descriptive analysis of  
36 523 real-world treatment patterns in a Turkish rheumatology population that continued  
37 524 innovator infliximab (Remicade) therapy or switched to biosimilar infliximab. *Arthritis*  
38 525 *Rheumatol*. 2016;68.
- 39 526 44. Kang Y-S, Moon HH, Lee SE, Lim YJ, Kang HW. Clinical Experience of the Use of CT-  
40 527 P13, a Biosimilar to Infliximab in Patients with Inflammatory Bowel Disease: A Case  
41 528 Series. *Digestive Diseases and Sciences*. 2015;60:951–6. doi:10.1007/s10620-014-3392-  
42 529 z.
- 43 530 45. NHS England and NHS improvement. What is a biosimilar medicine? 2019.  
44 531 [https://www.england.nhs.uk/wp-content/uploads/2019/05/what-is-a-biosimilar-medicine-](https://www.england.nhs.uk/wp-content/uploads/2019/05/what-is-a-biosimilar-medicine-guide-v2.pdf)  
45 532 [guide-v2.pdf](https://www.england.nhs.uk/wp-content/uploads/2019/05/what-is-a-biosimilar-medicine-guide-v2.pdf). Accessed 5 Oct 2022.
- 46 533 46. Mayoral-Zavala A, Esquivel-Aguilar A, Del Real-Calzada CM, Gutiérrez-Grobe Y,  
47 534 Ramos-García J, Rocha-Ramírez JL, et al. Update on biosimilars in inflammatory bowel  
48 535 disease: Position and recommendations in Mexico. [Actualización sobre los  
49 536 medicamentos biocomparables en la enfermedad inflamatoria intestinal: posición y  
50 537 recomendación en México]. *Rev Gastroenterol Mex (Engl Ed)*. 2018;83:414–23.  
51 538 doi:10.1016/j.rgm.2018.03.003.  
52  
53  
54  
55  
56  
57  
58  
59  
60



- 1  
2  
3 539 47. Cantini F, Benucci M. Focus on biosimilar etanercept - bioequivalence and  
4 540 interchangeability. *Biologics*. 2018;12:87–95. doi:10.2147/BTT.S126854.  
5 541  
6 542 48. Busato A, Matter P, Künzi B, Goodman D. Geographic variation in the cost of  
7 543 ambulatory care in Switzerland. *J Health Serv Res Policy*. 2012;17:18–23.  
8 544 doi:10.1258/jhsrp.2011.010056.  
9 545 49. Panczak R, Luta X, Maessen M, Stuck AE, Berlin C, Schmidlin K, et al. Regional  
10 546 Variation of Cost of Care in the Last 12 Months of Life in Switzerland: Small-area  
11 547 Analysis Using Insurance Claims Data. *Med Care*. 2017;55:155–63.  
12 548 doi:10.1097/MLR.0000000000000634.  
13 549 50. Rémuzat C, Dorey J, Cristeau O, Ionescu D, Radière G, Toumi M. Key drivers for market  
14 550 penetration of biosimilars in Europe. *J Mark Access Health Policy*. 2017;5:1272308.  
15 551 doi:10.1080/20016689.2016.1272308.  
16 552 51. Bocquet F, Paubel P, Fusier I, Cordonnier A-L, Le Pen C, Sinègre M. Biosimilar  
17 553 granulocyte colony-stimulating factor uptakes in the EU-5 markets: a descriptive analysis.  
18 554 *Appl Health Econ Health Policy*. 2014;12:315–26. doi:10.1007/s40258-014-0087-8.  
19 555 52. Bocquet F, Paubel P, Fusier I, Cordonnier A-L, Sinègre M, Le Pen C. Biosimilar versus  
20 556 patented erythropoietins: learning from 5 years of European and Japanese experience.  
21 557 *Appl Health Econ Health Policy*. 2015;13:47–59. doi:10.1007/s40258-014-0125-6.  
22 558 53. Drozdowska A, Hermanowski T. Exploring the opinions and experiences of patients with  
23 559 generic substitution: a representative study of Polish society. *Int J Clin Pharm*.  
24 560 2015;37:68–75. doi:10.1007/s11096-014-0041-8.  
25 561 54. Heikkilä R, Mäntyselkä P, Ahonen R. Price, familiarity, and availability determine the  
26 562 choice of drug - a population-based survey five years after generic substitution was  
27 563 introduced in Finland. *BMC Clin Pharmacol*. 2011;11:20. doi:10.1186/1472-6904-11-20.  
28 564 55. Rathe J, Søndergaard J, Jarbøl DE, Hallas J, Andersen M. Patients' concern about their  
29 565 medicine after a generic switch: a combined cross-sectional questionnaire and register  
30 566 study. *Pharmacoepidemiol Drug Saf*. 2014;23:965–73. doi:10.1002/pds.3671.  
31 567 56. Shrank WH, Cadarette SM, Cox E, Fischer MA, Mehta J, Brookhart AM, et al. Is there a  
32 568 relationship between patient beliefs or communication about generic drugs and  
33 569 medication utilization? *Med Care*. 2009;47:319–25.  
34 570 doi:10.1097/MLR.0b013e31818af850.  
35 571 57. Olsson E, Svensberg K, Wallach-Kildemoes H, Carlsson E, Hällkvist C, Kaae S,  
36 572 Sporrang SK. Swedish patients' trust in the bioequivalence of interchangeable generics.  
37 573 What factors are important for low trust? *Pharm Pract (Granada)*. 2018;16:1298.  
38 574 doi:10.18549/PharmPract.2018.04.1298.  
39 575 58. Chapman SCE, Horne R, Chater A, Hukins D, Smithson WH. Patients' perspectives on  
40 576 antiepileptic medication: relationships between beliefs about medicines and adherence  
41 577 among patients with epilepsy in UK primary care. *Epilepsy Behav*. 2014;31:312–20.  
42 578 doi:10.1016/j.yebeh.2013.10.016.  
43 579 59. Faasse K, Grey A, Horne R, Petrie KJ. High perceived sensitivity to medicines is  
44 580 associated with higher medical care utilisation, increased symptom reporting and greater  
45 581 information-seeking about medication. *Pharmacoepidemiol Drug Saf*. 2015;24:592–9.  
46 582 doi:10.1002/pds.3751.  
47 583 60. Lee YH, Song GG. Comparative efficacy and safety of etanercept biosimilars in  
48 584 comparison with etanercept in patients with rheumatoid arthritis who have insufficient  
49 585 response to methotrexate: A network meta-analysis. *Int J Clin Pharmacol Ther*.  
50 586 2021;59:760–7. doi:10.5414/CP204049.  
51 587 61. Decollogny A, Eggli Y, Halfon P, Lufkin TM. Determinants of generic drug substitution  
52 588 in Switzerland. *BMC Health Serv Res*. 2011;11:17. doi:10.1186/1472-6963-11-17.  
53  
54  
55  
56  
57  
58  
59  
60

- 1  
2  
3 588 62. Daubenfeld T, Dassow J, Keßler M, Schulze J. Understanding the market dynamics of  
4 589 biosimilars. *Journal of Business Chemistry*. 2016.  
5 590 63. Shannon Coughlin. Market Research for the Pharmaceutical Benefits Schedule (PBS) and  
6 591 Biosimilar Medicines. 2016. [https://docsbay.net/market-research-for-the-pharmaceutical-](https://docsbay.net/market-research-for-the-pharmaceutical-benefits-schedule-pbs-and-biosimilar-medicines)  
7 592 [benefits-schedule-pbs-and-biosimilar-medicines](https://docsbay.net/market-research-for-the-pharmaceutical-benefits-schedule-pbs-and-biosimilar-medicines).  
8 593 64. O'Callaghan J, Bermingham M, Leonard M, Hallinan F, Morris JM, Moore U, Griffin BT.  
9 594 Assessing awareness and attitudes of healthcare professionals on the use of biosimilar  
10 595 medicines: A survey of physicians and pharmacists in Ireland. *Regul Toxicol Pharmacol*.  
11 596 2017;88:252–61. doi:10.1016/j.yrtph.2017.06.013.  
12 597 65. Currie J, MacLeod WB, van Parys J. Provider practice style and patient health outcomes:  
13 598 The case of heart attacks. *Journal of Health Economics*. 2016;47:64–80.  
14 599 doi:10.1016/j.jhealeco.2016.01.013.  
15 600 66. Ebbers HC, Muenzberg M, Schellekens H. The safety of switching between therapeutic  
16 601 proteins. *Expert Opin Biol Ther*. 2012;12:1473–85. doi:10.1517/14712598.2012.711308.  
17 602 67. El Zorkany B, Al Ani N, Al Emadi S, Al Saleh J, Uthman I, El Dershaby Y, et al.  
18 603 Biosimilars in rheumatology: recommendations for regulation and use in Middle Eastern  
19 604 countries. *Clin Rheumatol*. 2018;37:1143–52. doi:10.1007/s10067-018-3982-9.  
20 605 68. Fiorino G, Caprioli F, Daperno M, Mocciaro F, Principi M, Viscido A, et al. Use of  
21 606 biosimilars in inflammatory bowel disease: a position update of the Italian Group for the  
22 607 Study of Inflammatory Bowel Disease (IG-IBD). *Dig Liver Dis*. 2019;51:632–9.  
23 608 doi:10.1016/j.dld.2019.02.004.  
24 609 69. Kay J, Dörner T, Emery P, Kvien TK, Breedveld FC. Clinical trial and 'real-world' data  
25 610 support switching from a bio-originator to its biosimilar. *Ann Rheum Dis*. 2020;79:e44.  
26 611 doi:10.1136/annrheumdis-2018-214994.  
27 612 70. Wiland P, Batko B, Brzosko M, Kucharz EJ, Samborski W, Świerkot J, et al. Biosimilar  
28 613 switching - current state of knowledge. *Reumatologia*. 2018;56:234–42.  
29 614 doi:10.5114/reum.2018.77975.  
30 615 71. Sigurdardottir V, Svärd A. Repeated switches between reference product etanercept and  
31 616 biosimilar do not affect disease activity or retention rate of etanercept over 24 months - a  
32 617 cohort study with historical controls. *Joint Bone Spine*. 2019;86:529–30.  
33 618 doi:10.1016/j.jbspin.2018.12.003.  
34 619 72. Federal act of 30 September 2011 on research involving human beings (human research  
35 620 act, HRA). 2019. [https://www.admin.ch/opc/en/classified-](https://www.admin.ch/opc/en/classified-compilation/20061313/index.html)  
36 621 [compilation/20061313/index.html](https://www.admin.ch/opc/en/classified-compilation/20061313/index.html). Accessed 15 Jul 2022.  
37  
38  
39  
40  
41  
42  
43  
44  
45

## FIGURE TITLE

46  
47  
48 622 **Figure 1.** Determinants of biosimilar initial prescription (logistic regression)  
49  
50  
51  
52  
53  
54  
55  
56  
57  
58  
59  
60

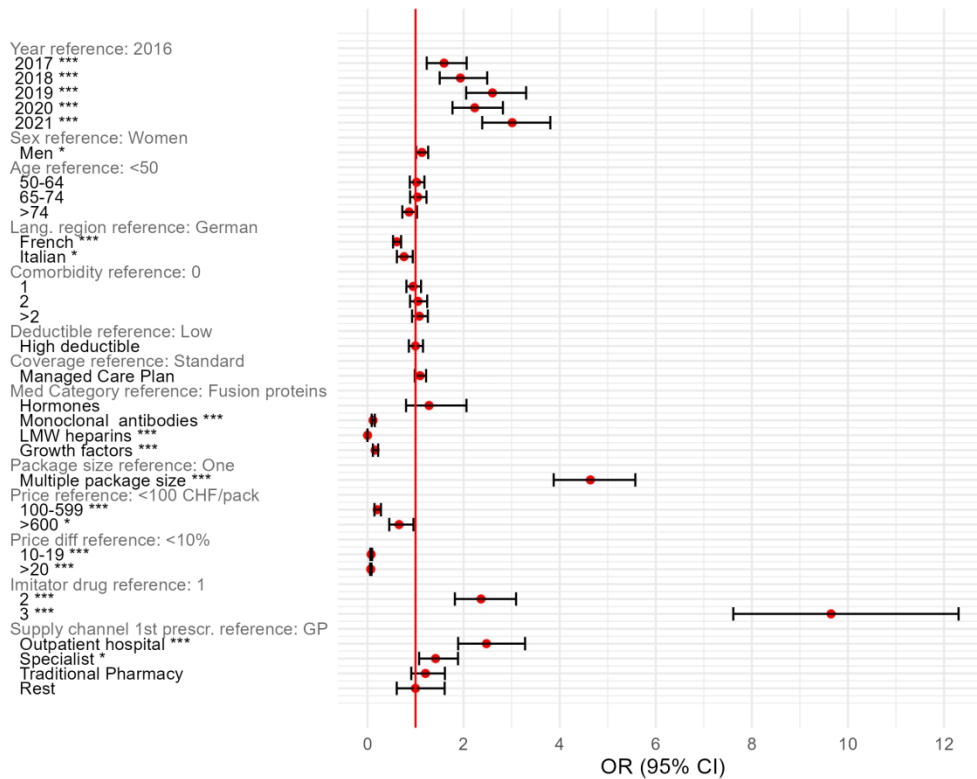

177x140mm (300 x 300 DPI)

Table A1 Substitution catalogue: reference product & biosimilar (2016-2021)

| ATC                                  | Reference Product |                  |               | Biosimilar      |                  |                  |               |
|--------------------------------------|-------------------|------------------|---------------|-----------------|------------------|------------------|---------------|
|                                      | medication        | Dose (mg) / unit | cost (in CHF) | medication      | Reimburment date | Dose (mg) / unit | cost (in CHF) |
| <i>Low-molecular-weight heparins</i> |                   |                  |               |                 |                  |                  |               |
| B01                                  | Clexane           | 20 / 10          | 41            | Inhixa          | 01.08.2020       | 20 / 10          | 38.55         |
| B01                                  | Clexane           | 20 / 50          | 139.55        | Inhixa          | 01.08.2020       | 20 / 50          | 127.25        |
| B01                                  | Clexane           | 40 / 2           | 17.35         | Inhixa          | 01.08.2020       | 40 / 2           | 16.45         |
| B01                                  | Clexane           | 40 / 10          | 62.45         | Inhixa          | 01.08.2020       | 40 / 10          | 57.85         |
| B01                                  | Clexane           | 40 / 50          | 246.75        | Inhixa          | 01.08.2020       | 40 / 50          | 223.7         |
| B01                                  | Clexane           | 60 / 10          | 76.65         | Inhixa          | 01.08.2020       | 60 / 10          | 70.6          |
| B01                                  | Clexane           | 80 / 10          | 102.3         | Inhixa          | 01.08.2020       | 80 / 10          | 93.7          |
| B01                                  | Clexane           | 100 / 10         | 123.75        | Inhixa          | 01.08.2020       | 100 / 10         | 113           |
| B01                                  | Clexane           | 120 / 10         | 134.9         | Inhixa          | 01.08.2020       | 120 / 10         | 123.05        |
| B01                                  | Clexane           | 150 / 10         | 161.3         | Inhixa          | 01.08.2020       | 150 / 10         | 146.8         |
| B01                                  | Clexane           | 300 / 1          | 41.3          | Inhixa          | 01.08.2020       | 300 / 1          | 38.8          |
| <i>Growth factors</i>                |                   |                  |               |                 |                  |                  |               |
| L03                                  | Neupogen          | 0.3 / 5          | 531.1         | Accofil         | 01.11.2019       | 0.3 / 5          | 479.65        |
|                                      |                   |                  |               | Filgrastim-Teva | 01.03.2010       | 0.3 / 5          | 479.65        |
|                                      |                   |                  |               | Zarzio          | 01.05.2010       | 0.3 / 5          | 479.65        |
| L03                                  | Neupogen          | 0.48 / 5         | 740.9         | Accofil         | 01.11.2019       | 0.48 / 5         | 668.45        |
|                                      |                   |                  |               | Filgrastim-Teva | 01.03.2010       | 0.48 / 5         | 668.45        |
|                                      |                   |                  |               | Zarzio          | 01.05.2010       | 0.48 / 5         | 668.45        |
| L03                                  | Neulasta          | 6 / 1            | 1668.75       | Grasustek       | 01.09.2021       | 6 / 1            | 1266.95       |
|                                      |                   |                  |               | Pelgraz         | 01.11.2019       | 6 / 1            | 1266.85       |
|                                      |                   |                  |               | Pelgraz         | 01.11.2019       | 6 / 1            | 1266.85       |
|                                      |                   |                  |               | Pelmeg          | 01.01.2020       | 6 / 1            | 857.55        |
|                                      |                   |                  |               | Ziextenzo       | 01.03.2020       | 6 / 1            | 1266.95       |
|                                      |                   |                  |               | Fulphila        | 01.06.2020       | 6 / 1            | 1266.85       |
| B03                                  | Epex              | 0.008 / 6        | 71.5          | Binocrit        | 01.10.2009       | 0.008 / 6        | 66.15         |
| B03                                  | Epex              | 0.017 / 6        | 126.55        | Binocrit        | 01.10.2009       | 0.017 / 6        | 115.7         |
| B03                                  | Epex              | 0.025 / 6        | 181.65        | Binocrit        | 01.10.2009       | 0.025 / 6        | 165.25        |
| B03                                  | Epex              | 0.037 / 6        | 236.75        | Binocrit        | 01.10.2009       | 0.037 / 6        | 214.7         |
| B03                                  | Epex              | 0.046 / 6        | 291.8         | Binocrit        | 01.10.2009       | 0.046 / 6        | 264.5         |
| B03                                  | Epex              | 0.092 / 6        | 567.2         | Binocrit        | 01.10.2009       | 0.092 / 6        | 512.1         |
| <i>Hormones</i>                      |                   |                  |               |                 |                  |                  |               |
| A10                                  | Lantus            | 10.9 / 5         | 81.85         | Abasaglar       | 01.09.2015       | 10.9 / 5         | 68.4          |
| G03                                  | GONAL-F           | 0.022 / 1        | 156.4         | Ovaleap         | 01.11.2018       | 0.022 / 1        | 122.05        |
| G03                                  | GONAL-F           | 0.033 / 1        | 226.45        | Ovaleap         | 01.11.2018       | 0.033 / 1        | 174.95        |

|                        |            |           |         |                  |            |           |         |
|------------------------|------------|-----------|---------|------------------|------------|-----------|---------|
| G03                    | GONAL-F    | 0.066 / 1 | 430.65  | Ovaleap          | 01.11.2018 | 0.066 / 1 | 329.1   |
| H01                    | Genotropin | 5 / 1     | 221.65  | Omnitrope        | 01.11.2010 | 5 / 1     | 201.1   |
| H01                    | Genotropin | 5 / 5     | 1041.9  | Omnitrope        | 01.11.2010 | 5 / 5     | 940     |
| H05                    | Forsteo    | 0.25 / 1  | 412.75  | Movymia          | 01.09.2019 | 0.25 / 1  | 340.75  |
|                        |            |           |         | Terrosa          | 01.09.2019 | 0.25 / 1  | 340.75  |
|                        |            |           |         | Terrosa          | 01.09.2019 | 0.25 / 1  | 340.75  |
| <i>Fusion proteins</i> |            |           |         |                  |            |           |         |
| L01                    | MabThera   | 100 / 2   | 627.3   | Rixathon         | 01.09.2018 | 100 / 2   | 505.5   |
|                        |            |           |         | Truxima          | 01.01.2019 | 100 / 2   | 505.5   |
| L01                    | MabThera   | 500 / 1   | 1515.65 | Rixathon         | 01.09.2018 | 500 / 1   | 1225.7  |
|                        |            |           |         | Truxima          | 01.01.2019 | 500 / 1   | 1225.7  |
| L01                    | Herceptin  | 150 / 1   | 686.4   | Herzuma          | 01.12.2021 | 150 / 1   | 562.45  |
|                        |            |           |         | Trazimera        | 01.10.2019 | 150 / 1   | 562.45  |
|                        |            |           |         | Kanjinti         | 01.02.2020 | 150 / 1   | 562.45  |
|                        |            |           |         | Ogivri           | 01.09.2020 | 150 / 1   | 562.45  |
| L01                    | Herceptin  | 440 / 1   | 1932.85 | Herzuma          | 01.12.2021 | 150 / 1   | 1586.75 |
|                        |            |           |         | Trazimera        | 01.10.2019 | 150 / 1   | 1586.75 |
|                        |            |           |         | Kanjinti         | 01.02.2020 | 150 / 1   | 1586.75 |
|                        |            |           |         | Ogivri           | 01.09.2020 | 150 / 1   | 1586.75 |
| L01                    | Avastin    | 100 / 1   | 410.65  | Oyavas           | 01.08.2021 | 100 / 1   | 312.1   |
|                        |            |           |         | Bevacizumab-Teva | 01.07.2021 | 100 / 1   | 312.1   |
|                        |            |           |         | MVASI            | 01.07.2020 | 100 / 1   | 312.1   |
|                        |            |           |         | Zirabev          | 01.08.2020 | 100 / 1   | 312.1   |
| L01                    | Avastin    | 400 / 1   | 1469.5  | Oyavas           | 01.08.2021 | 400 / 1   | 1117.5  |
|                        |            |           |         | Bevacizumab-Teva | 01.07.2021 | 400 / 1   | 1117.5  |
|                        |            |           |         | MVASI            | 01.07.2020 | 400 / 1   | 1117.5  |
|                        |            |           |         | Zirabev          | 01.08.2020 | 400 / 1   | 1117.5  |
| L04                    | Enbrel     | 25 / 4    | 682.35  | Benepali         | 01.04.2019 | 25 / 4    | 515.8   |
|                        |            |           |         | Erelzi           | 01.07.2018 | 25 / 4    | 515.8   |
| L04                    | Enbrel     | 50 / 2    | 669.05  | Benepali         | 01.04.2019 | 50 / 2    | 504.3   |
|                        |            |           |         | Erelzi           | 01.07.2018 | 50 / 2    | 505.9   |
| L04                    | Remicade   | 100 / 1   | 695.75  | Inflectra        | 01.08.2016 | 100 / 1   | 627.25  |
|                        |            |           |         | Remsima          | 01.01.2016 | 100 / 1   | 627.25  |
| L04                    | Humira     | 20 / 2    | 661.8   | Hyrimoz          | 01.11.2019 | 20 / 2    | 500.45  |
| L04                    | Humira     | 40 / 1    | 661.8   | Abrilada         | 01.06.2021 | 40 / 1    | 500.45  |
|                        |            |           |         | Amgevita         | 01.11.2019 | 40 / 1    | 500.45  |
|                        |            |           |         | Hyrimoz          | 01.11.2019 | 40 / 1    | 500.45  |
|                        |            |           |         | Idacio           | 01.08.2020 | 40 / 1    | 500.45  |
|                        |            |           |         | Imraldi          | 01.07.2020 | 40 / 1    | 498.55  |
|                        |            |           |         | Hulio            | 01.08.2020 | 40 / 1    | 500.45  |

**Table A2 First Prescriptions: Reference Products (active substance)**

| Active substance | total         | 2016        | 2017        | 2018        | 2019        | 2020          | 2021          |
|------------------|---------------|-------------|-------------|-------------|-------------|---------------|---------------|
| n                | 14'987        | 433 (2.9%)  | 394 (2.6%)  | 501 (3.3%)  | 861 (5.7%)  | 4'525 (30.2%) | 8'273 (55.2%) |
| Adalimumab       | 369 (2.5%)    | 0 (0.0%)    | 0 (0.0%)    | 0 (0.0%)    | 24 (2.8%)   | 182 (4.0%)    | 163 (2.0%)    |
| Bevacizumab      | 267 (1.8%)    | 0 (0.0%)    | 0 (0.0%)    | 0 (0.0%)    | 0 (0.0%)    | 96 (2.1%)     | 171 (2.1%)    |
| Enoxaparin       | 9'785 (65.3%) | 0 (0.0%)    | 0 (0.0%)    | 0 (0.0%)    | 0 (0.0%)    | 3'047 (67.3%) | 6'738 (81.4%) |
| Epoetin alfa     | 136 (0.9%)    | 20 (4.6%)   | 30 (7.6%)   | 19 (3.8%)   | 23 (2.7%)   | 24 (0.5%)     | 20 (0.2%)     |
| Etanercept       | 176 (1.2%)    | 0 (0.0%)    | 0 (0.0%)    | 37 (7.4%)   | 55 (6.4%)   | 38 (0.8%)     | 46 (0.6%)     |
| Filgrastim       | 658 (4.4%)    | 158 (36.5%) | 134 (34.0%) | 107 (21.4%) | 85 (9.9%)   | 104 (2.3%)    | 70 (0.8%)     |
| Follitropin alfa | 747 (5.0%)    | 0 (0.0%)    | 0 (0.0%)    | 41 (8.2%)   | 182 (21.1%) | 226 (5.0%)    | 298 (3.6%)    |
| Infliximab       | 530 (3.5%)    | 141 (32.6%) | 103 (26.1%) | 74 (14.8%)  | 68 (7.9%)   | 68 (1.5%)     | 76 (0.9%)     |
| Insulin glargin  | 640 (4.3%)    | 113 (26.1%) | 127 (32.2%) | 126 (25.1%) | 102 (11.8%) | 88 (1.9%)     | 84 (1.0%)     |
| Pegfilgrastim    | 457 (3.0%)    | 0 (0.0%)    | 0 (0.0%)    | 0 (0.0%)    | 35 (4.1%)   | 225 (5.0%)    | 197 (2.4%)    |
| Rituximab        | 661 (4.4%)    | 0 (0.0%)    | 0 (0.0%)    | 97 (19.4%)  | 203 (23.6%) | 178 (3.9%)    | 183 (2.2%)    |
| Somatropin       | 5 (0.0%)      | 1 (0.2%)    | 0 (0.0%)    | 0 (0.0%)    | 2 (0.2%)    | 2 (0.0%)      | 0 (0.0%)      |
| Teriparatid      | 304 (2.0%)    | 0 (0.0%)    | 0 (0.0%)    | 0 (0.0%)    | 55 (6.4%)   | 134 (3.0%)    | 115 (1.4%)    |
| Trastuzumab      | 252 (1.7%)    | 0 (0.0%)    | 0 (0.0%)    | 0 (0.0%)    | 27 (3.1%)   | 113 (2.5%)    | 112 (1.4%)    |

**Table A3 First Prescriptions: Biosimilars (active substance)**

| Active substance | total         | 2016        | 2017        | 2018        | 2019        | 2020        | 2021          |
|------------------|---------------|-------------|-------------|-------------|-------------|-------------|---------------|
| n                | 3'489         | 261 (7.5%)  | 344 (9.9%)  | 393 (11.3%) | 616 (17.7%) | 809 (23.2%) | 1'066 (30.6%) |
| Adalimumab       | 165 (4.7%)    | 0 (0.0%)    | 0 (0.0%)    | 0 (0.0%)    | 7 (1.1%)    | 63 (7.8%)   | 95 (8.9%)     |
| Bevacizumab      | 28 (0.8%)     | 0 (0.0%)    | 0 (0.0%)    | 0 (0.0%)    | 0 (0.0%)    | 5 (0.6%)    | 23 (2.2%)     |
| Enoxaparin       | 76 (2.2%)     | 0 (0.0%)    | 0 (0.0%)    | 0 (0.0%)    | 0 (0.0%)    | 7 (0.9%)    | 69 (6.5%)     |
| Epoetin alfa     | 34 (1.0%)     | 8 (3.1%)    | 2 (0.6%)    | 7 (1.8%)    | 9 (1.5%)    | 3 (0.4%)    | 5 (0.5%)      |
| Etanercept       | 185 (5.3%)    | 0 (0.0%)    | 0 (0.0%)    | 10 (2.5%)   | 49 (8.0%)   | 69 (8.5%)   | 57 (5.3%)     |
| Filgrastim       | 1'854 (53.1%) | 243 (93.1%) | 271 (78.8%) | 295 (75.1%) | 342 (55.5%) | 336 (41.5%) | 367 (34.4%)   |
| Follitropin alfa | 219 (6.3%)    | 0 (0.0%)    | 0 (0.0%)    | 1 (0.3%)    | 40 (6.5%)   | 71 (8.8%)   | 107 (10.0%)   |
| Infliximab       | 281 (8.1%)    | 7 (2.7%)    | 31 (9.0%)   | 49 (12.5%)  | 54 (8.8%)   | 61 (7.5%)   | 79 (7.4%)     |
| Insulin glargin  | 141 (4.0%)    | 0 (0.0%)    | 39 (11.3%)  | 29 (7.4%)   | 33 (5.4%)   | 21 (2.6%)   | 19 (1.8%)     |
| Pegfilgrastim    | 129 (3.7%)    | 0 (0.0%)    | 0 (0.0%)    | 0 (0.0%)    | 0 (0.0%)    | 32 (4.0%)   | 97 (9.1%)     |
| Rituximab        | 318 (9.1%)    | 0 (0.0%)    | 0 (0.0%)    | 1 (0.3%)    | 78 (12.7%)  | 120 (14.8%) | 119 (11.2%)   |
| Somatropin       | 5 (0.1%)      | 3 (1.1%)    | 1 (0.3%)    | 1 (0.3%)    | 0 (0.0%)    | 0 (0.0%)    | 0 (0.0%)      |
| Teriparatid      | 47 (1.3%)     | 0 (0.0%)    | 0 (0.0%)    | 0 (0.0%)    | 4 (0.6%)    | 20 (2.5%)   | 23 (2.2%)     |
| Trastuzumab      | 7 (0.2%)      | 0 (0.0%)    | 0 (0.0%)    | 0 (0.0%)    | 0 (0.0%)    | 1 (0.1%)    | 6 (0.6%)      |

**Table A4 Rest prescriptions: Reference Products (active substance)**

| Active substance | total         | 2016         | 2017         | 2018         | 2019          | 2020          | 2021           |
|------------------|---------------|--------------|--------------|--------------|---------------|---------------|----------------|
| n                | 33'958        | 1'293 (3.8%) | 1'645 (4.8%) | 1'736 (5.1%) | 3'662 (10.8%) | 9'939 (29.3%) | 15'683 (46.2%) |
| Adalimumab       | 3'070 (9.0%)  | 0 (0.0%)     | 0 (0.0%)     | 0 (0.0%)     | 41 (1.1%)     | 1'354 (13.6%) | 1'675 (10.7%)  |
| Bevacizumab      | 2'109 (6.2%)  | 0 (0.0%)     | 0 (0.0%)     | 0 (0.0%)     | 0 (0.0%)      | 481 (4.8%)    | 1'628 (10.4%)  |
| Enoxaparin       | 8'669 (25.5%) | 0 (0.0%)     | 0 (0.0%)     | 0 (0.0%)     | 0 (0.0%)      | 2'343 (23.6%) | 6'326 (40.3%)  |
| Epoetin alfa     | 2'052 (6.0%)  | 234 (18.1%)  | 385 (23.4%)  | 408 (23.5%)  | 200 (5.5%)    | 422 (4.2%)    | 403 (2.6%)     |
| Etanercept       | 791 (2.3%)    | 0 (0.0%)     | 0 (0.0%)     | 90 (5.2%)    | 310 (8.5%)    | 198 (2.0%)    | 193 (1.2%)     |
| Filgrastim       | 2'252 (6.6%)  | 408 (31.6%)  | 428 (26.0%)  | 403 (23.2%)  | 275 (7.5%)    | 403 (4.1%)    | 335 (2.1%)     |
| Follitropin alfa | 1'914 (5.6%)  | 0 (0.0%)     | 0 (0.0%)     | 19 (1.1%)    | 502 (13.7%)   | 561 (5.6%)    | 832 (5.3%)     |
| Infliximab       | 2'973 (8.8%)  | 543 (42.0%)  | 660 (40.1%)  | 424 (24.4%)  | 434 (11.9%)   | 435 (4.4%)    | 477 (3.0%)     |
| Insulin glargin  | 1'036 (3.1%)  | 108 (8.4%)   | 170 (10.3%)  | 134 (7.7%)   | 443 (12.1%)   | 112 (1.1%)    | 69 (0.4%)      |
| Pegfilgrastim    | 1'426 (4.2%)  | 0 (0.0%)     | 0 (0.0%)     | 0 (0.0%)     | 78 (2.1%)     | 699 (7.0%)    | 649 (4.1%)     |
| Rituximab        | 3'148 (9.3%)  | 0 (0.0%)     | 0 (0.0%)     | 258 (14.9%)  | 1'177 (32.1%) | 814 (8.2%)    | 899 (5.7%)     |
| Somatropin       | 7 (0.0%)      | 0 (0.0%)     | 2 (0.1%)     | 0 (0.0%)     | 2 (0.1%)      | 3 (0.0%)      | 0 (0.0%)       |
| Teriparatid      | 1'791 (5.3%)  | 0 (0.0%)     | 0 (0.0%)     | 0 (0.0%)     | 79 (2.2%)     | 856 (8.6%)    | 856 (5.5%)     |
| Trastuzumab      | 2'720 (8.0%)  | 0 (0.0%)     | 0 (0.0%)     | 0 (0.0%)     | 121 (3.3%)    | 1'258 (12.7%) | 1'341 (8.6%)   |

**Table A5 Rest prescriptions: Biosimilars (active substance)**

| Active substance | total         | 2016        | 2017         | 2018         | 2019          | 2020          | 2021          |
|------------------|---------------|-------------|--------------|--------------|---------------|---------------|---------------|
| n                | 16'293        | 754 (4.6%)  | 1'071 (6.6%) | 1'578 (9.7%) | 2'644 (16.2%) | 4'349 (26.7%) | 5'897 (36.2%) |
| Adalimumab       | 3'100 (19.0%) | 0 (0.0%)    | 0 (0.0%)     | 0 (0.0%)     | 64 (2.4%)     | 1'256 (28.9%) | 1'780 (30.2%) |
| Bevacizumab      | 306 (1.9%)    | 0 (0.0%)    | 0 (0.0%)     | 0 (0.0%)     | 0 (0.0%)      | 21 (0.5%)     | 285 (4.8%)    |
| Enoxaparin       | 41 (0.3%)     | 0 (0.0%)    | 0 (0.0%)     | 0 (0.0%)     | 0 (0.0%)      | 3 (0.1%)      | 38 (0.6%)     |
| Epoetin alfa     | 844 (5.2%)    | 32 (4.2%)   | 114 (10.6%)  | 257 (16.3%)  | 369 (14.0%)   | 55 (1.3%)     | 17 (0.3%)     |
| Etanercept       | 930 (5.7%)    | 0 (0.0%)    | 0 (0.0%)     | 23 (1.5%)    | 247 (9.3%)    | 377 (8.7%)    | 283 (4.8%)    |
| Filgrastim       | 5'894 (36.2%) | 695 (92.2%) | 752 (70.2%)  | 897 (56.8%)  | 1'110 (42.0%) | 1'142 (26.3%) | 1'298 (22.0%) |
| Follitropin alfa | 583 (3.6%)    | 0 (0.0%)    | 0 (0.0%)     | 0 (0.0%)     | 74 (2.8%)     | 210 (4.8%)    | 299 (5.1%)    |
| Infliximab       | 1'507 (9.2%)  | 23 (3.1%)   | 115 (10.7%)  | 274 (17.4%)  | 278 (10.5%)   | 374 (8.6%)    | 443 (7.5%)    |
| Insulin glargin  | 509 (3.1%)    | 0 (0.0%)    | 80 (7.5%)    | 126 (8.0%)   | 143 (5.4%)    | 98 (2.3%)     | 62 (1.1%)     |
| Pegfilgrastim    | 406 (2.5%)    | 0 (0.0%)    | 0 (0.0%)     | 0 (0.0%)     | 0 (0.0%)      | 125 (2.9%)    | 281 (4.8%)    |
| Rituximab        | 1'763 (10.8%) | 0 (0.0%)    | 0 (0.0%)     | 0 (0.0%)     | 356 (13.5%)   | 564 (13.0%)   | 843 (14.3%)   |
| Somatropin       | 16 (0.1%)     | 4 (0.5%)    | 10 (0.9%)    | 1 (0.1%)     | 1 (0.0%)      | 0 (0.0%)      | 0 (0.0%)      |
| Teriparatid      | 297 (1.8%)    | 0 (0.0%)    | 0 (0.0%)     | 0 (0.0%)     | 2 (0.1%)      | 114 (2.6%)    | 181 (3.1%)    |
| Trastuzumab      | 97 (0.6%)     | 0 (0.0%)    | 0 (0.0%)     | 0 (0.0%)     | 0 (0.0%)      | 10 (0.2%)     | 87 (1.5%)     |

**Table A6 Biosimilars quota by active substance**

| Active substance | Avg. relative Price difference | Biosimilars quota (IP+RP) |       |       |       |       |       |
|------------------|--------------------------------|---------------------------|-------|-------|-------|-------|-------|
|                  |                                | 2016                      | 2017  | 2018  | 2019  | 2020  | 2021  |
| Adalimumab       | 24.63                          | -                         | -     | -     | 52.21 | 46.2  | 50.5  |
| Bevacizumab      | 23.98                          | -                         | -     | -     | -     | 4.31  | 14.62 |
| Enoxaparin       | 7.77                           | -                         | -     | -     | -     | <1    | <1    |
| Epoetin alfa     | 8.91                           | 3.1                       | 21.85 | 38.21 | 62.9  | 11.51 | 4.94  |
| Etanercept       | 24.52                          | -                         | -     | 20.63 | 44.78 | 65.4  | 58.72 |

1  
2  
3  
4  
5  
6  
7  
8  
9  
10  
11  
12  
13  
14  
15  
16  
17  
18  
19  
20  
21  
22  
23  
24  
25  
26  
27  
28  
29  
30  
31  
32  
33  
34  
35  
36  
37  
38  
39  
40  
41  
42  
43  
44  
45  
46  
47  
48  
49  
50  
51  
52  
53  
54  
55  
56  
57  
58  
59  
60

|                  |       |       |       |       |       |       |       |
|------------------|-------|-------|-------|-------|-------|-------|-------|
| Filgrastim       | 9.73  | 62.37 | 64.54 | 70.04 | 80.13 | 74.46 | 80.43 |
| Follitropin alfa | 22.76 | -     | -     | 1.64  | 14.29 | 26.31 | 26.43 |
| Infliximab       | 9.85  | 4.2   | 15.53 | 39.34 | 39.81 | 46.38 | 48.56 |
| Insulin glargin  | 16.43 | -     | 33.62 | 37.35 | 24.41 | 37.3  | 34.62 |
| Pegfilgrastim    | 48.61 | -     | -     | -     | -     | 14.52 | 30.88 |
| Rituximab        | 19.27 | -     | -     | <1    | 23.93 | 40.81 | 47.06 |
| Somatropin       | 9.53  | 87.5  | 84.62 | 100   | 20    | 0     | -     |
| Teriparatid      | 17.44 | -     | -     | -     | 4.29  | 11.84 | 17.36 |
| Trastuzumab      | 17.98 | -     | -     | -     | -     | <1    | 6.02  |

**Table A7 Frequency of medication switches by active substance**

| Category                      | Active substance | Proportion to all switches (%) |         |        |         |
|-------------------------------|------------------|--------------------------------|---------|--------|---------|
|                               |                  | RP to RP                       | RP to B | B to B | B to RP |
| Fusion proteins               | Etanercept       | 0.27                           | 4.4     | 0.29   | 1.59    |
| Hormones                      | Follitropin alfa | 9.41                           | 5.35    | 8.1    | 5.84    |
| Hormones                      | Insulin glargin  | 0.27                           | 2.95    | 0.17   | 2.72    |
| Hormones                      | Somatropin       | 0.02                           | 0.07    | 0      | 0       |
| Hormones                      | Teriparatid      | 0.21                           | 1.42    | 1.34   | 2.51    |
| Monoclonal antibodies         | Adalimumab       | 4.52                           | 4.04    | 1.75   | 4.63    |
| Monoclonal antibodies         | Bevacizumab      | 11.38                          | 1.67    | 4.31   | 5.98    |
| Monoclonal antibodies         | Infliximab       | 1.86                           | 8.95    | 2.33   | 6.4     |
| Monoclonal antibodies         | Rituximab        | 21.81                          | 11.75   | 31.24  | 13.05   |
| Monoclonal antibodies         | Trastuzumab      | 6.94                           | 1.02    | 1.52   | 7.89    |
| Low-molecular-weight heparins | Enoxaparin       | 25.57                          | 0.65    | 0.06   | 30.88   |
| Growth factors                | Epoetin alfa     | 14.22                          | 1.16    | 24.94  | 1.17    |
| Growth factors                | Filgrastim       | 2.4                            | 50.75   | 21.5   | 8.07    |
| Growth factors                | Pegfilgrastim    | 1.13                           | 5.82    | 2.45   | 9.27    |

**Table A8 Three models (A-C) assessing determinants of biosimilar first prescription (logistic regression)**

| Variables          | Model A:<br>sociodemographic variables | Model B:<br>Model A + medication variables | Model C:<br>Model B + provider variables |
|--------------------|----------------------------------------|--------------------------------------------|------------------------------------------|
|                    | OR [95%CI]                             | OR [95%CI]                                 | OR [95%CI]                               |
| Intercept          | 0.429 [0.355, 0.518]                   | 0.831 [0.49, 1.402]                        | 0.706 [0.399, 1.241]                     |
| Year:              |                                        |                                            |                                          |
| 2016 (reference)   |                                        |                                            |                                          |
| 2017               | 1.381 [1.129, 1.692]                   | 1.602 [1.246, 2.062]                       | 1.594 [1.233, 2.064]                     |
| 2018               | 1.354 [1.113, 1.648]                   | 1.983 [1.551, 2.539]                       | 1.934 [1.503, 2.492]                     |
| 2019               | 1.493 [1.246, 1.793]                   | 2.64 [2.094, 3.332]                        | 2.602 [2.054, 3.302]                     |
| 2020               | 0.42 [0.356, 0.497]                    | 2.203 [1.755, 2.769]                       | 2.232 [1.769, 2.819]                     |
| 2021               | 0.302 [0.256, 0.355]                   | 3.077 [2.452, 3.867]                       | 3.012 [2.388, 3.806]                     |
| Sex:               |                                        |                                            |                                          |
| Female (reference) |                                        |                                            |                                          |
| Male               | 0.998 [0.922, 1.081]                   | 1.137 [1.02, 1.267]                        | 1.132 [1.014, 1.263]                     |



|    |                                    |                      |                       |                       |
|----|------------------------------------|----------------------|-----------------------|-----------------------|
| 1  |                                    |                      |                       |                       |
| 2  |                                    |                      |                       |                       |
| 3  | Age:                               |                      |                       |                       |
| 4  | <50 (reference)                    |                      |                       |                       |
| 5  | 50-64                              | 1.302 [1.169, 1.452] | 1.005 [0.867, 1.164]  | 1.022 [0.881, 1.185]  |
| 6  | 65-74                              | 1.571 [1.401, 1.761] | 1.044 [0.889, 1.227]  | 1.044 [0.887, 1.228]  |
| 7  | >74                                | 0.961 [0.849, 1.086] | 0.825 [0.694, 0.98]   | 0.864 [0.725, 1.03]   |
| 8  | Language region                    |                      |                       |                       |
| 9  | German (reference)                 |                      |                       |                       |
| 10 | French                             | 0.578 [0.521, 0.64]  | 0.582 [0.51, 0.664]   | 0.611 [0.532, 0.7]    |
| 11 | Italian                            | 0.467 [0.397, 0.546] | 0.744 [0.601, 0.918]  | 0.761 [0.612, 0.942]  |
| 12 | Number of comorbidity:             |                      |                       |                       |
| 13 | 0 (reference)                      |                      |                       |                       |
| 14 | 1                                  | 1.054 [0.932, 1.191] | 0.934 [0.796, 1.094]  | 0.95 [0.81, 1.115]    |
| 15 | 2                                  | 1.095 [0.963, 1.244] | 1.041 [0.88, 1.23]    | 1.05 [0.886, 1.243]   |
| 16 | >2                                 | 0.938 [0.837, 1.051] | 1.05 [0.904, 1.22]    | 1.08 [0.928, 1.256]   |
| 17 | Deductible:                        |                      |                       |                       |
| 18 | Low (reference)                    |                      |                       |                       |
| 19 | High                               | 1.067 [0.954, 1.192] | 1.005 [0.868, 1.163]  | 0.998 [0.861, 1.155]  |
| 20 | Managed care                       | 1.029 [0.949, 1.116] | 1.103 [0.992, 1.226]  | 1.095 [0.984, 1.22]   |
| 21 | Category:                          |                      |                       |                       |
| 22 | Fusion proteins (reference)        |                      |                       |                       |
| 23 | Hormones                           |                      | 1.297 [0.816, 2.081]  | 1.281 [0.803, 2.06]   |
| 24 | Monoclonal antibodies              |                      | 0.152 [0.116, 0.199]  | 0.115 [0.087, 0.152]  |
| 25 | Low-molecular-weight heparins      |                      | 0.001 [0.001, 0.001]  | 0.001 [0, 0.001]      |
| 26 | Growth factors                     |                      | 0.235 [0.168, 0.327]  | 0.158 [0.112, 0.222]  |
| 27 | Multiple package size              |                      | 4.551 [3.808, 5.461]  | 4.64 [3.876, 5.575]   |
| 28 | Cost per package of reference      |                      |                       |                       |
| 29 | product (in CHF)                   |                      |                       |                       |
| 30 | <100                               |                      |                       |                       |
| 31 | 100-599                            |                      | 0.254 [0.185, 0.349]  | 0.202 [0.145, 0.28]   |
| 32 | >600                               |                      | 0.853 [0.592, 1.236]  | 0.657 [0.453, 0.957]  |
| 33 | Relative price difference (%)      |                      |                       |                       |
| 34 | <10                                |                      |                       |                       |
| 35 | 10-19                              |                      | 0.091 [0.072, 0.115]  | 0.076 [0.059, 0.096]  |
| 36 | >20                                |                      | 0.067 [0.053, 0.084]  | 0.067 [0.054, 0.084]  |
| 37 | Number of available imitator drug: |                      |                       |                       |
| 38 | 1 (reference)                      |                      |                       |                       |
| 39 | 2                                  |                      | 2.15 [1.671, 2.785]   | 2.363 [1.819, 3.093]  |
| 40 | >2                                 |                      | 8.143 [6.502, 10.248] | 9.649 [7.614, 12.303] |
| 41 | Suppl                              |                      |                       |                       |
| 42 | General practitioner (reference)   |                      |                       |                       |
| 43 | Outpatient hospital                |                      |                       | 2.477 [1.887, 3.28]   |
| 44 | Specialist                         |                      |                       | 1.417 [1.075, 1.884]  |
| 45 | Traditional pharmacy               |                      |                       | 1.207 [0.911, 1.611]  |
| 46 | Rest                               |                      |                       | 0.998 [0.609, 1.606]  |
| 47 | Observations                       | 18'953               | 18'953                | 18'953                |
| 48 | AIC                                | 16'588               | 9'868                 | 9'735                 |
| 49 | BIC                                | 16'722               | 10'088                | 9'986                 |
| 50 |                                    |                      |                       |                       |
| 51 |                                    |                      |                       |                       |
| 52 |                                    |                      |                       |                       |
| 53 |                                    |                      |                       |                       |
| 54 |                                    |                      |                       |                       |
| 55 |                                    |                      |                       |                       |
| 56 |                                    |                      |                       |                       |
| 57 |                                    |                      |                       |                       |
| 58 |                                    |                      |                       |                       |
| 59 |                                    |                      |                       |                       |
| 60 |                                    |                      |                       |                       |

# Reporting checklist for cohort study.

Based on the STROBE cohort guidelines.

## Instructions to authors

Complete this checklist by entering the page numbers from your manuscript where readers will find each of the items listed below.

Your article may not currently address all the items on the checklist. Please modify your text to include the missing information. If you are certain that an item does not apply, please write "n/a" and provide a short explanation.

|                           | Reporting Item                                                                                                      | Page Number |
|---------------------------|---------------------------------------------------------------------------------------------------------------------|-------------|
| <b>Title and abstract</b> |                                                                                                                     |             |
| Title                     | <a href="#">#1a</a> Indicate the study's design with a commonly used term in the title or the abstract              | 1           |
| Abstract                  | <a href="#">#1b</a> Provide in the abstract an informative and balanced summary of what was done and what was found | 2,3         |
| <b>Introduction</b>       |                                                                                                                     |             |
| Background / rationale    | <a href="#">#2</a> Explain the scientific background and rationale for the investigation being reported             | 4,5         |

|    |                      |                     |                                                    |                       |
|----|----------------------|---------------------|----------------------------------------------------|-----------------------|
| 1  | Objectives           | <a href="#">#3</a>  | State specific objectives, including any           | 4,5                   |
| 2  |                      |                     | prespecified hypotheses                            |                       |
| 3  |                      |                     |                                                    |                       |
| 4  |                      |                     |                                                    |                       |
| 5  |                      |                     |                                                    |                       |
| 6  | <b>Methods</b>       |                     |                                                    |                       |
| 7  |                      |                     |                                                    |                       |
| 8  |                      |                     |                                                    |                       |
| 9  |                      |                     |                                                    |                       |
| 10 | Study design         | <a href="#">#4</a>  | Present key elements of study design early in the  | 5,6,7                 |
| 11 |                      |                     | paper                                              |                       |
| 12 |                      |                     |                                                    |                       |
| 13 |                      |                     |                                                    |                       |
| 14 |                      |                     |                                                    |                       |
| 15 | Setting              | <a href="#">#5</a>  | Describe the setting, locations, and relevant      | 5,6,7                 |
| 16 |                      |                     | dates, including periods of recruitment, exposure, |                       |
| 17 |                      |                     | follow-up, and data collection                     |                       |
| 18 |                      |                     |                                                    |                       |
| 19 |                      |                     |                                                    |                       |
| 20 |                      |                     |                                                    |                       |
| 21 |                      |                     |                                                    |                       |
| 22 |                      |                     |                                                    |                       |
| 23 | Eligibility criteria | <a href="#">#6a</a> | Give the eligibility criteria, and the sources and | 5,6                   |
| 24 |                      |                     | methods of selection of participants. Describe     |                       |
| 25 |                      |                     | methods of follow-up.                              |                       |
| 26 |                      |                     |                                                    |                       |
| 27 |                      |                     |                                                    |                       |
| 28 |                      |                     |                                                    |                       |
| 29 |                      |                     |                                                    |                       |
| 30 | Eligibility criteria | <a href="#">#6b</a> | For matched studies, give matching criteria and    | n/a. The resent study |
| 31 |                      |                     | number of exposed and unexposed                    | does not contain      |
| 32 |                      |                     |                                                    | matched studies       |
| 33 |                      |                     |                                                    |                       |
| 34 |                      |                     |                                                    |                       |
| 35 |                      |                     |                                                    |                       |
| 36 |                      |                     |                                                    |                       |
| 37 |                      |                     |                                                    |                       |
| 38 | Variables            | <a href="#">#7</a>  | Clearly define all outcomes, exposures,            | 5,6,7                 |
| 39 |                      |                     | predictors, potential confounders, and effect      |                       |
| 40 |                      |                     | modifiers. Give diagnostic criteria, if applicable |                       |
| 41 |                      |                     |                                                    |                       |
| 42 |                      |                     |                                                    |                       |
| 43 |                      |                     |                                                    |                       |
| 44 |                      |                     |                                                    |                       |
| 45 |                      |                     |                                                    |                       |
| 46 | Data sources /       | <a href="#">#8</a>  | For each variable of interest give sources of data | 3,4                   |
| 47 | measurement          |                     | and details of methods of assessment               |                       |
| 48 |                      |                     | (measurement). Describe comparability of           |                       |
| 49 |                      |                     | assessment methods if there is more than one       |                       |
| 50 |                      |                     | group. Give information separately for for         |                       |
| 51 |                      |                     | exposed and unexposed groups if applicable.        |                       |
| 52 |                      |                     |                                                    |                       |
| 53 |                      |                     |                                                    |                       |
| 54 |                      |                     |                                                    |                       |
| 55 |                      |                     |                                                    |                       |
| 56 |                      |                     |                                                    |                       |
| 57 |                      |                     |                                                    |                       |
| 58 |                      |                     |                                                    |                       |
| 59 |                      |                     |                                                    |                       |
| 60 |                      |                     |                                                    |                       |

|    |                |                      |                                                      |       |
|----|----------------|----------------------|------------------------------------------------------|-------|
| 1  | Bias           | <a href="#">#9</a>   | Describe any efforts to address potential sources    | 6,7   |
| 2  |                |                      | of bias                                              |       |
| 3  |                |                      |                                                      |       |
| 4  |                |                      |                                                      |       |
| 5  |                |                      |                                                      |       |
| 6  | Study size     | <a href="#">#10</a>  | Explain how the study size was arrived at            | 5,6   |
| 7  |                |                      |                                                      |       |
| 8  |                |                      |                                                      |       |
| 9  | Quantitative   | <a href="#">#11</a>  | Explain how quantitative variables were handled      | 5,6,7 |
| 10 | variables      |                      | in the analyses. If applicable, describe which       |       |
| 11 |                |                      | groupings were chosen, and why                       |       |
| 12 |                |                      |                                                      |       |
| 13 |                |                      |                                                      |       |
| 14 |                |                      |                                                      |       |
| 15 |                |                      |                                                      |       |
| 16 |                |                      |                                                      |       |
| 17 | Statistical    | <a href="#">#12a</a> | Describe all statistical methods, including those    | 7,8   |
| 18 | methods        |                      | used to control for confounding                      |       |
| 19 |                |                      |                                                      |       |
| 20 |                |                      |                                                      |       |
| 21 |                |                      |                                                      |       |
| 22 | Statistical    | <a href="#">#12b</a> | Describe any methods used to examine                 | 7,8   |
| 23 | methods        |                      | subgroups and interactions                           |       |
| 24 |                |                      |                                                      |       |
| 25 |                |                      |                                                      |       |
| 26 |                |                      |                                                      |       |
| 27 |                |                      |                                                      |       |
| 28 | Statistical    | <a href="#">#12c</a> | Explain how missing data were addressed              | 8     |
| 29 | methods        |                      |                                                      |       |
| 30 |                |                      |                                                      |       |
| 31 |                |                      |                                                      |       |
| 32 |                |                      |                                                      |       |
| 33 | Statistical    | <a href="#">#12d</a> | If applicable, explain how loss to follow-up was     | 8     |
| 34 | methods        |                      | addressed                                            |       |
| 35 |                |                      |                                                      |       |
| 36 |                |                      |                                                      |       |
| 37 |                |                      |                                                      |       |
| 38 | Statistical    | <a href="#">#12e</a> | Describe any sensitivity analyses                    | n/a   |
| 39 | methods        |                      |                                                      |       |
| 40 |                |                      |                                                      |       |
| 41 |                |                      |                                                      |       |
| 42 |                |                      |                                                      |       |
| 43 |                |                      |                                                      |       |
| 44 | <b>Results</b> |                      |                                                      |       |
| 45 |                |                      |                                                      |       |
| 46 |                |                      |                                                      |       |
| 47 | Participants   | <a href="#">#13a</a> | Report numbers of individuals at each stage of       | 8     |
| 48 |                |                      | study—eg numbers potentially eligible, examined      |       |
| 49 |                |                      | for eligibility, confirmed eligible, included in the |       |
| 50 |                |                      | study, completing follow-up, and analysed. Give      |       |
| 51 |                |                      |                                                      |       |
| 52 |                |                      |                                                      |       |
| 53 |                |                      |                                                      |       |
| 54 |                |                      |                                                      |       |
| 55 |                |                      |                                                      |       |
| 56 |                |                      |                                                      |       |
| 57 |                |                      |                                                      |       |
| 58 |                |                      |                                                      |       |
| 59 |                |                      |                                                      |       |
| 60 |                |                      |                                                      |       |

|    |                  |                                                                        |                        |
|----|------------------|------------------------------------------------------------------------|------------------------|
| 1  |                  | information separately for exposed and                                 |                        |
| 2  |                  |                                                                        |                        |
| 3  |                  | unexposed groups if applicable.                                        |                        |
| 4  |                  |                                                                        |                        |
| 5  |                  |                                                                        |                        |
| 6  | Participants     | <a href="#">#13b</a> Give reasons for non-participation at each stage  | 8                      |
| 7  |                  |                                                                        |                        |
| 8  |                  |                                                                        |                        |
| 9  | Participants     | <a href="#">#13c</a> Consider use of a flow diagram                    | n/a, addressed in text |
| 10 |                  |                                                                        |                        |
| 11 |                  |                                                                        | at page 4              |
| 12 |                  |                                                                        |                        |
| 13 |                  |                                                                        |                        |
| 14 | Descriptive data | <a href="#">#14a</a> Give characteristics of study participants (eg    | 8,9                    |
| 15 |                  | demographic, clinical, social) and information on                      |                        |
| 16 |                  | exposures and potential confounders. Give                              |                        |
| 17 |                  | information separately for exposed and                                 |                        |
| 18 |                  | unexposed groups if applicable.                                        |                        |
| 19 |                  |                                                                        |                        |
| 20 |                  |                                                                        |                        |
| 21 |                  |                                                                        |                        |
| 22 |                  |                                                                        |                        |
| 23 |                  |                                                                        |                        |
| 24 |                  |                                                                        |                        |
| 25 |                  |                                                                        |                        |
| 26 | Descriptive data | <a href="#">#14b</a> Indicate number of participants with missing data | n/a. We excluded       |
| 27 |                  | for each variable of interest                                          | missing data before    |
| 28 |                  |                                                                        | descriptively          |
| 29 |                  |                                                                        | analysing the study    |
| 30 |                  |                                                                        | population             |
| 31 |                  |                                                                        |                        |
| 32 |                  |                                                                        |                        |
| 33 |                  |                                                                        |                        |
| 34 |                  |                                                                        |                        |
| 35 |                  |                                                                        |                        |
| 36 |                  |                                                                        |                        |
| 37 |                  |                                                                        |                        |
| 38 | Descriptive data | <a href="#">#14c</a> Summarise follow-up time (eg, average and total   | 8,9,10,11              |
| 39 |                  | amount)                                                                |                        |
| 40 |                  |                                                                        |                        |
| 41 |                  |                                                                        |                        |
| 42 |                  |                                                                        |                        |
| 43 |                  |                                                                        |                        |
| 44 | Outcome data     | <a href="#">#15</a> Report numbers of outcome events or summary        | 8,9,10,11              |
| 45 |                  | measures over time. Give information separately                        |                        |
| 46 |                  | for exposed and unexposed groups if applicable.                        |                        |
| 47 |                  |                                                                        |                        |
| 48 |                  |                                                                        |                        |
| 49 |                  |                                                                        |                        |
| 50 |                  |                                                                        |                        |
| 51 | Main results     | <a href="#">#16a</a> Give unadjusted estimates and, if applicable,     | 8,9,10,11              |
| 52 |                  | confounder-adjusted estimates and their                                |                        |
| 53 |                  | precision (eg, 95% confidence interval). Make                          |                        |
| 54 |                  |                                                                        |                        |
| 55 |                  |                                                                        |                        |
| 56 |                  |                                                                        |                        |
| 57 |                  |                                                                        |                        |
| 58 |                  |                                                                        |                        |
| 59 |                  |                                                                        |                        |
| 60 |                  |                                                                        |                        |

|    |                   |                                                                         |             |
|----|-------------------|-------------------------------------------------------------------------|-------------|
| 1  |                   | clear which confounders were adjusted for and                           |             |
| 2  |                   | why they were included                                                  |             |
| 3  |                   |                                                                         |             |
| 4  |                   |                                                                         |             |
| 5  |                   |                                                                         |             |
| 6  | Main results      | <a href="#">#16b</a> Report category boundaries when continuous         | 8,9,10,11   |
| 7  |                   |                                                                         |             |
| 8  |                   | variables were categorized                                              |             |
| 9  |                   |                                                                         |             |
| 10 |                   |                                                                         |             |
| 11 | Main results      | <a href="#">#16c</a> If relevant, consider translating estimates of     | 12          |
| 12 |                   |                                                                         |             |
| 13 |                   | relative risk into absolute risk for a meaningful                       |             |
| 14 |                   |                                                                         |             |
| 15 |                   | time period                                                             |             |
| 16 |                   |                                                                         |             |
| 17 |                   |                                                                         |             |
| 18 | Other analyses    | <a href="#">#17</a> Report other analyses done—eg analyses of           | n/a         |
| 19 |                   |                                                                         |             |
| 20 |                   | subgroups and interactions, and sensitivity                             |             |
| 21 |                   |                                                                         |             |
| 22 |                   | analyses                                                                |             |
| 23 |                   |                                                                         |             |
| 24 |                   |                                                                         |             |
| 25 |                   |                                                                         |             |
| 26 | <b>Discussion</b> |                                                                         |             |
| 27 |                   |                                                                         |             |
| 28 |                   |                                                                         |             |
| 29 | Key results       | <a href="#">#18</a> Summarise key results with reference to study       | 13          |
| 30 |                   |                                                                         |             |
| 31 |                   | objectives                                                              |             |
| 32 |                   |                                                                         |             |
| 33 |                   |                                                                         |             |
| 34 |                   |                                                                         |             |
| 35 | Limitations       | <a href="#">#19</a> Discuss limitations of the study, taking into       | 17          |
| 36 |                   |                                                                         |             |
| 37 |                   | account sources of potential bias or imprecision.                       |             |
| 38 |                   |                                                                         |             |
| 39 |                   | Discuss both direction and magnitude of any                             |             |
| 40 |                   |                                                                         |             |
| 41 |                   | potential bias.                                                         |             |
| 42 |                   |                                                                         |             |
| 43 |                   |                                                                         |             |
| 44 |                   |                                                                         |             |
| 45 | Interpretation    | <a href="#">#20</a> Give a cautious overall interpretation considering  | 13,14,15,16 |
| 46 |                   |                                                                         |             |
| 47 |                   | objectives, limitations, multiplicity of analyses,                      |             |
| 48 |                   |                                                                         |             |
| 49 |                   | results from similar studies, and other relevant                        |             |
| 50 |                   |                                                                         |             |
| 51 |                   | evidence.                                                               |             |
| 52 |                   |                                                                         |             |
| 53 |                   |                                                                         |             |
| 54 |                   |                                                                         |             |
| 55 | Generalisability  | <a href="#">#21</a> Discuss the generalisability (external validity) of | 17          |
| 56 |                   |                                                                         |             |
| 57 |                   | the study results                                                       |             |
| 58 |                   |                                                                         |             |
| 59 |                   |                                                                         |             |
| 60 |                   |                                                                         |             |

1 Other

2  
3 Information

4  
5  
6 Funding [#22](#) Give the source of funding and the role of the 19  
7 funders for the present study and, if applicable,  
8  
9 for the original study on which the present article  
10  
11 is based  
12  
13  
14

15  
16 Notes:

- 17  
18  
19  
20 • 6b: n/a. The present study does not contain matched studies  
21  
22  
23 • 13c: n/a, addressed in text at page 4  
24  
25  
26 • 14b: n/a. We excluded missing data before descriptively analysing the study population  
27  
28  
29 • 20: 13,14,15,16 The STROBE checklist is distributed under the terms of the Creative Commons  
30 Attribution License CC-BY. This checklist was completed on 06.10.2023 using  
31 <https://www.goodreports.org/>, a tool made by the [EQUATOR Network](#) in collaboration with  
32  
33 [Penelope.ai](#)  
34  
35  
36  
37  
38  
39  
40  
41  
42  
43  
44  
45  
46  
47  
48  
49  
50  
51  
52  
53  
54  
55  
56  
57  
58  
59  
60
