# Supplementary material for: Initial prescriptions and medication switches of biological products: an analysis of prescription pathways and determinants in the Swiss healthcare setting
Source: PubMed Central journal article supplement — BMJ Open. 2023 Nov 21;13(11):e077454. doi: 10.1136/bmjopen-2023-077454 (PMC10668177; doi:10.1136/bmjopen-2023-077454), 2023-11-21
Supplement: bmjopen-2023-077454supp001.pdf [file bmjopen-2023-077454supp001.pdf]

## Confidential

Table A1 Substitution catalogue: reference product &amp; biosimilar (2016-2021)

| ATC                                  | Reference Product |                  |               | Biosimilar      |                  |                  |               |
|--------------------------------------|-------------------|------------------|---------------|-----------------|------------------|------------------|---------------|
|                                      | medication        | Dose (mg) / unit | cost (in CHF) | medication      | Reimburment date | Dose (mg) / unit | cost (in CHF) |
| <i>Low-molecular-weight heparins</i> |                   |                  |               |                 |                  |                  |               |
| B01                                  | Clexane           | 20 / 10          | 41            | Inhixa          | 01.08.2020       | 20 / 10          | 38.55         |
| B01                                  | Clexane           | 20 / 50          | 139.55        | Inhixa          | 01.08.2020       | 20 / 50          | 127.25        |
| B01                                  | Clexane           | 40 / 2           | 17.35         | Inhixa          | 01.08.2020       | 40 / 2           | 16.45         |
| B01                                  | Clexane           | 40 / 10          | 62.45         | Inhixa          | 01.08.2020       | 40 / 10          | 57.85         |
| B01                                  | Clexane           | 40 / 50          | 246.75        | Inhixa          | 01.08.2020       | 40 / 50          | 223.7         |
| B01                                  | Clexane           | 60 / 10          | 76.65         | Inhixa          | 01.08.2020       | 60 / 10          | 70.6          |
| B01                                  | Clexane           | 80 / 10          | 102.3         | Inhixa          | 01.08.2020       | 80 / 10          | 93.7          |
| B01                                  | Clexane           | 100 / 10         | 123.75        | Inhixa          | 01.08.2020       | 100 / 10         | 113           |
| B01                                  | Clexane           | 120 / 10         | 134.9         | Inhixa          | 01.08.2020       | 120 / 10         | 123.05        |
| B01                                  | Clexane           | 150 / 10         | 161.3         | Inhixa          | 01.08.2020       | 150 / 10         | 146.8         |
| B01                                  | Clexane           | 300 / 1          | 41.3          | Inhixa          | 01.08.2020       | 300 / 1          | 38.8          |
| <i>Growth factors</i>                |                   |                  |               |                 |                  |                  |               |
| L03                                  | Neupogen          | 0.3 / 5          | 531.1         | Accofil         | 01.11.2019       | 0.3 / 5          | 479.65        |
|                                      |                   |                  |               | Filgrastim-Teva | 01.03.2010       | 0.3 / 5          | 479.65        |
|                                      |                   |                  |               | Zarzio          | 01.05.2010       | 0.3 / 5          | 479.65        |
| L03                                  | Neupogen          | 0.48 / 5         | 740.9         | Accofil         | 01.11.2019       | 0.48 / 5         | 668.45        |
|                                      |                   |                  |               | Filgrastim-Teva | 01.03.2010       | 0.48 / 5         | 668.45        |
|                                      |                   |                  |               | Zarzio          | 01.05.2010       | 0.48 / 5         | 668.45        |
| L03                                  | Neulasta          | 6 / 1            | 1668.75       | Grasustek       | 01.09.2021       | 6 / 1            | 1266.95       |
|                                      |                   |                  |               | Pelgraz         | 01.11.2019       | 6 / 1            | 1266.85       |
|                                      |                   |                  |               | Pelgraz         | 01.11.2019       | 6 / 1            | 1266.85       |
|                                      |                   |                  |               | Pelmeg          | 01.01.2020       | 6 / 1            | 857.55        |
|                                      |                   |                  |               | Ziextenzo       | 01.03.2020       | 6 / 1            | 1266.95       |
|                                      |                   |                  |               | Fulphila        | 01.06.2020       | 6 / 1            | 1266.85       |
| B03                                  | Epex              | 0.008 / 6        | 71.5          | Binocrit        | 01.10.2009       | 0.008 / 6        | 66.15         |
| B03                                  | Epex              | 0.017 / 6        | 126.55        | Binocrit        | 01.10.2009       | 0.017 / 6        | 115.7         |
| B03                                  | Epex              | 0.025 / 6        | 181.65        | Binocrit        | 01.10.2009       | 0.025 / 6        | 165.25        |
| B03                                  | Epex              | 0.037 / 6        | 236.75        | Binocrit        | 01.10.2009       | 0.037 / 6        | 214.7         |
| B03                                  | Epex              | 0.046 / 6        | 291.8         | Binocrit        | 01.10.2009       | 0.046 / 6        | 264.5         |
| B03                                  | Epex              | 0.092 / 6        | 567.2         | Binocrit        | 01.10.2009       | 0.092 / 6        | 512.1         |
| <i>Hormones</i>                      |                   |                  |               |                 |                  |                  |               |
| A10                                  | Lantus            | 10.9 / 5         | 81.85         | Abasaglar       | 01.09.2015       | 10.9 / 5         | 68.4          |
| G03                                  | GONAL-F           | 0.022 / 1        | 156.4         | Ovaleap         | 01.11.2018       | 0.022 / 1        | 122.05        |
| G03                                  | GONAL-F           | 0.033 / 1        | 226.45        | Ovaleap         | 01.11.2018       | 0.033 / 1        | 174.95        |

## Confidential

|                        |            |           |         |                  |            |           |         |
|------------------------|------------|-----------|---------|------------------|------------|-----------|---------|
| G03                    | GONAL-F    | 0.066 / 1 | 430.65  | Ovaleap          | 01.11.2018 | 0.066 / 1 | 329.1   |
| H01                    | Genotropin | 5 / 1     | 221.65  | Omnitrope        | 01.11.2010 | 5 / 1     | 201.1   |
| H01                    | Genotropin | 5 / 5     | 1041.9  | Omnitrope        | 01.11.2010 | 5 / 5     | 940     |
| H05                    | Forsteo    | 0.25 / 1  | 412.75  | Movymia          | 01.09.2019 | 0.25 / 1  | 340.75  |
|                        |            |           |         | Terrosa          | 01.09.2019 | 0.25 / 1  | 340.75  |
|                        |            |           |         | Terrosa          | 01.09.2019 | 0.25 / 1  | 340.75  |
| <i>Fusion proteins</i> |            |           |         |                  |            |           |         |
| L01                    | MabThera   | 100 / 2   | 627.3   | Rixathon         | 01.09.2018 | 100 / 2   | 505.5   |
|                        |            |           |         | Truxima          | 01.01.2019 | 100 / 2   | 505.5   |
| L01                    | MabThera   | 500 / 1   | 1515.65 | Rixathon         | 01.09.2018 | 500 / 1   | 1225.7  |
|                        |            |           |         | Truxima          | 01.01.2019 | 500 / 1   | 1225.7  |
| L01                    | Herceptin  | 150 / 1   | 686.4   | Herzuma          | 01.12.2021 | 150 / 1   | 562.45  |
|                        |            |           |         | Trazimera        | 01.10.2019 | 150 / 1   | 562.45  |
|                        |            |           |         | Kanjinti         | 01.02.2020 | 150 / 1   | 562.45  |
|                        |            |           |         | Ogivri           | 01.09.2020 | 150 / 1   | 562.45  |
| L01                    | Herceptin  | 440 / 1   | 1932.85 | Herzuma          | 01.12.2021 | 150 / 1   | 1586.75 |
|                        |            |           |         | Trazimera        | 01.10.2019 | 150 / 1   | 1586.75 |
|                        |            |           |         | Kanjinti         | 01.02.2020 | 150 / 1   | 1586.75 |
|                        |            |           |         | Ogivri           | 01.09.2020 | 150 / 1   | 1586.75 |
| L01                    | Avastin    | 100 / 1   | 410.65  | Oyavas           | 01.08.2021 | 100 / 1   | 312.1   |
|                        |            |           |         | Bevacizumab-Teva | 01.07.2021 | 100 / 1   | 312.1   |
|                        |            |           |         | MVASI            | 01.07.2020 | 100 / 1   | 312.1   |
|                        |            |           |         | Zirabev          | 01.08.2020 | 100 / 1   | 312.1   |
| L01                    | Avastin    | 400 / 1   | 1469.5  | Oyavas           | 01.08.2021 | 400 / 1   | 1117.5  |
|                        |            |           |         | Bevacizumab-Teva | 01.07.2021 | 400 / 1   | 1117.5  |
|                        |            |           |         | MVASI            | 01.07.2020 | 400 / 1   | 1117.5  |
|                        |            |           |         | Zirabev          | 01.08.2020 | 400 / 1   | 1117.5  |
| L04                    | Enbrel     | 25 / 4    | 682.35  | Benepali         | 01.04.2019 | 25 / 4    | 515.8   |
|                        |            |           |         | Erelzi           | 01.07.2018 | 25 / 4    | 515.8   |
| L04                    | Enbrel     | 50 / 2    | 669.05  | Benepali         | 01.04.2019 | 50 / 2    | 504.3   |
|                        |            |           |         | Erelzi           | 01.07.2018 | 50 / 2    | 505.9   |
| L04                    | Remicade   | 100 / 1   | 695.75  | Inflectra        | 01.08.2016 | 100 / 1   | 627.25  |
|                        |            |           |         | Remsima          | 01.01.2016 | 100 / 1   | 627.25  |
| L04                    | Humira     | 20 / 2    | 661.8   | Hyrimoz          | 01.11.2019 | 20 / 2    | 500.45  |
| L04                    | Humira     | 40 / 1    | 661.8   | Abirilada        | 01.06.2021 | 40 / 1    | 500.45  |
|                        |            |           |         | Amgevita         | 01.11.2019 | 40 / 1    | 500.45  |
|                        |            |           |         | Hyrimoz          | 01.11.2019 | 40 / 1    | 500.45  |
|                        |            |           |         | Idacio           | 01.08.2020 | 40 / 1    | 500.45  |
|                        |            |           |         | Imraldi          | 01.07.2020 | 40 / 1    | 498.55  |
|                        |            |           |         | Hulio            | 01.08.2020 | 40 / 1    | 500.45  |

## Confidential

Table A2 First Prescriptions: Reference Products (active substance)

| Active substance | total         | 2016        | 2017        | 2018        | 2019        | 2020          | 2021          |
|------------------|---------------|-------------|-------------|-------------|-------------|---------------|---------------|
| n                | 14'987        | 433 (2.9%)  | 394 (2.6%)  | 501 (3.3%)  | 861 (5.7%)  | 4'525 (30.2%) | 8'273 (55.2%) |
| Adalimumab       | 369 (2.5%)    | 0 (0.0%)    | 0 (0.0%)    | 0 (0.0%)    | 24 (2.8%)   | 182 (4.0%)    | 163 (2.0%)    |
| Bevacizumab      | 267 (1.8%)    | 0 (0.0%)    | 0 (0.0%)    | 0 (0.0%)    | 0 (0.0%)    | 96 (2.1%)     | 171 (2.1%)    |
| Enoxaparin       | 9'785 (65.3%) | 0 (0.0%)    | 0 (0.0%)    | 0 (0.0%)    | 0 (0.0%)    | 3'047 (67.3%) | 6'738 (81.4%) |
| Epoetin alfa     | 136 (0.9%)    | 20 (4.6%)   | 30 (7.6%)   | 19 (3.8%)   | 23 (2.7%)   | 24 (0.5%)     | 20 (0.2%)     |
| Etanercept       | 176 (1.2%)    | 0 (0.0%)    | 0 (0.0%)    | 37 (7.4%)   | 55 (6.4%)   | 38 (0.8%)     | 46 (0.6%)     |
| Filgrastim       | 658 (4.4%)    | 158 (36.5%) | 134 (34.0%) | 107 (21.4%) | 85 (9.9%)   | 104 (2.3%)    | 70 (0.8%)     |
| Follitropin alfa | 747 (5.0%)    | 0 (0.0%)    | 0 (0.0%)    | 41 (8.2%)   | 182 (21.1%) | 226 (5.0%)    | 298 (3.6%)    |
| Infliximab       | 530 (3.5%)    | 141 (32.6%) | 103 (26.1%) | 74 (14.8%)  | 68 (7.9%)   | 68 (1.5%)     | 76 (0.9%)     |
| Insulin glargin  | 640 (4.3%)    | 113 (26.1%) | 127 (32.2%) | 126 (25.1%) | 102 (11.8%) | 88 (1.9%)     | 84 (1.0%)     |
| Pegfilgrastim    | 457 (3.0%)    | 0 (0.0%)    | 0 (0.0%)    | 0 (0.0%)    | 35 (4.1%)   | 225 (5.0%)    | 197 (2.4%)    |
| Rituximab        | 661 (4.4%)    | 0 (0.0%)    | 0 (0.0%)    | 97 (19.4%)  | 203 (23.6%) | 178 (3.9%)    | 183 (2.2%)    |
| Somatropin       | 5 (0.0%)      | 1 (0.2%)    | 0 (0.0%)    | 0 (0.0%)    | 2 (0.2%)    | 2 (0.0%)      | 0 (0.0%)      |
| Teriparatid      | 304 (2.0%)    | 0 (0.0%)    | 0 (0.0%)    | 0 (0.0%)    | 55 (6.4%)   | 134 (3.0%)    | 115 (1.4%)    |
| Trastuzumab      | 252 (1.7%)    | 0 (0.0%)    | 0 (0.0%)    | 0 (0.0%)    | 27 (3.1%)   | 113 (2.5%)    | 112 (1.4%)    |

Table A3 First Prescriptions: Biosimilars (active substance)

| Active substance | total         | 2016        | 2017        | 2018        | 2019        | 2020        | 2021          |
|------------------|---------------|-------------|-------------|-------------|-------------|-------------|---------------|
| n                | 3'489         | 261 (7.5%)  | 344 (9.9%)  | 393 (11.3%) | 616 (17.7%) | 809 (23.2%) | 1'066 (30.6%) |
| Adalimumab       | 165 (4.7%)    | 0 (0.0%)    | 0 (0.0%)    | 0 (0.0%)    | 7 (1.1%)    | 63 (7.8%)   | 95 (8.9%)     |
| Bevacizumab      | 28 (0.8%)     | 0 (0.0%)    | 0 (0.0%)    | 0 (0.0%)    | 0 (0.0%)    | 5 (0.6%)    | 23 (2.2%)     |
| Enoxaparin       | 76 (2.2%)     | 0 (0.0%)    | 0 (0.0%)    | 0 (0.0%)    | 0 (0.0%)    | 7 (0.9%)    | 69 (6.5%)     |
| Epoetin alfa     | 34 (1.0%)     | 8 (3.1%)    | 2 (0.6%)    | 7 (1.8%)    | 9 (1.5%)    | 3 (0.4%)    | 5 (0.5%)      |
| Etanercept       | 185 (5.3%)    | 0 (0.0%)    | 0 (0.0%)    | 10 (2.5%)   | 49 (8.0%)   | 69 (8.5%)   | 57 (5.3%)     |
| Filgrastim       | 1'854 (53.1%) | 243 (93.1%) | 271 (78.8%) | 295 (75.1%) | 342 (55.5%) | 336 (41.5%) | 367 (34.4%)   |
| Follitropin alfa | 219 (6.3%)    | 0 (0.0%)    | 0 (0.0%)    | 1 (0.3%)    | 40 (6.5%)   | 71 (8.8%)   | 107 (10.0%)   |
| Infliximab       | 281 (8.1%)    | 7 (2.7%)    | 31 (9.0%)   | 49 (12.5%)  | 54 (8.8%)   | 61 (7.5%)   | 79 (7.4%)     |
| Insulin glargin  | 141 (4.0%)    | 0 (0.0%)    | 39 (11.3%)  | 29 (7.4%)   | 33 (5.4%)   | 21 (2.6%)   | 19 (1.8%)     |
| Pegfilgrastim    | 129 (3.7%)    | 0 (0.0%)    | 0 (0.0%)    | 0 (0.0%)    | 0 (0.0%)    | 32 (4.0%)   | 97 (9.1%)     |
| Rituximab        | 318 (9.1%)    | 0 (0.0%)    | 0 (0.0%)    | 1 (0.3%)    | 78 (12.7%)  | 120 (14.8%) | 119 (11.2%)   |
| Somatropin       | 5 (0.1%)      | 3 (1.1%)    | 1 (0.3%)    | 1 (0.3%)    | 0 (0.0%)    | 0 (0.0%)    | 0 (0.0%)      |
| Teriparatid      | 47 (1.3%)     | 0 (0.0%)    | 0 (0.0%)    | 0 (0.0%)    | 4 (0.6%)    | 20 (2.5%)   | 23 (2.2%)     |
| Trastuzumab      | 7 (0.2%)      | 0 (0.0%)    | 0 (0.0%)    | 0 (0.0%)    | 0 (0.0%)    | 1 (0.1%)    | 6 (0.6%)      |

## Confidential

Table A4 Rest prescriptions: Reference Products (active substance)

| Active substance | total         | 2016         | 2017         | 2018         | 2019          | 2020          | 2021           |
|------------------|---------------|--------------|--------------|--------------|---------------|---------------|----------------|
| n                | 33'958        | 1'293 (3.8%) | 1'645 (4.8%) | 1'736 (5.1%) | 3'662 (10.8%) | 9'939 (29.3%) | 15'683 (46.2%) |
| Adalimumab       | 3'070 (9.0%)  | 0 (0.0%)     | 0 (0.0%)     | 0 (0.0%)     | 41 (1.1%)     | 1'354 (13.6%) | 1'675 (10.7%)  |
| Bevacizumab      | 2'109 (6.2%)  | 0 (0.0%)     | 0 (0.0%)     | 0 (0.0%)     | 0 (0.0%)      | 481 (4.8%)    | 1'628 (10.4%)  |
| Enoxaparin       | 8'669 (25.5%) | 0 (0.0%)     | 0 (0.0%)     | 0 (0.0%)     | 0 (0.0%)      | 2'343 (23.6%) | 6'326 (40.3%)  |
| Epoetin alfa     | 2'052 (6.0%)  | 234 (18.1%)  | 385 (23.4%)  | 408 (23.5%)  | 200 (5.5%)    | 422 (4.2%)    | 403 (2.6%)     |
| Etanercept       | 791 (2.3%)    | 0 (0.0%)     | 0 (0.0%)     | 90 (5.2%)    | 310 (8.5%)    | 198 (2.0%)    | 193 (1.2%)     |
| Filgrastim       | 2'252 (6.6%)  | 408 (31.6%)  | 428 (26.0%)  | 403 (23.2%)  | 275 (7.5%)    | 403 (4.1%)    | 335 (2.1%)     |
| Follitropin alfa | 1'914 (5.6%)  | 0 (0.0%)     | 0 (0.0%)     | 19 (1.1%)    | 502 (13.7%)   | 561 (5.6%)    | 832 (5.3%)     |
| Infliximab       | 2'973 (8.8%)  | 543 (42.0%)  | 660 (40.1%)  | 424 (24.4%)  | 434 (11.9%)   | 435 (4.4%)    | 477 (3.0%)     |
| Insulin glargin  | 1'036 (3.1%)  | 108 (8.4%)   | 170 (10.3%)  | 134 (7.7%)   | 443 (12.1%)   | 112 (1.1%)    | 69 (0.4%)      |
| Pegfilgrastim    | 1'426 (4.2%)  | 0 (0.0%)     | 0 (0.0%)     | 0 (0.0%)     | 78 (2.1%)     | 699 (7.0%)    | 649 (4.1%)     |
| Rituximab        | 3'148 (9.3%)  | 0 (0.0%)     | 0 (0.0%)     | 258 (14.9%)  | 1'177 (32.1%) | 814 (8.2%)    | 899 (5.7%)     |
| Somatropin       | 7 (0.0%)      | 0 (0.0%)     | 2 (0.1%)     | 0 (0.0%)     | 2 (0.1%)      | 3 (0.0%)      | 0 (0.0%)       |
| Teriparatid      | 1'791 (5.3%)  | 0 (0.0%)     | 0 (0.0%)     | 0 (0.0%)     | 79 (2.2%)     | 856 (8.6%)    | 856 (5.5%)     |
| Trastuzumab      | 2'720 (8.0%)  | 0 (0.0%)     | 0 (0.0%)     | 0 (0.0%)     | 121 (3.3%)    | 1'258 (12.7%) | 1'341 (8.6%)   |

Table A5 Rest prescriptions: Biosimilars (active substance)

| Active substance | total         | 2016        | 2017         | 2018         | 2019          | 2020          | 2021          |
|------------------|---------------|-------------|--------------|--------------|---------------|---------------|---------------|
| n                | 16'293        | 754 (4.6%)  | 1'071 (6.6%) | 1'578 (9.7%) | 2'644 (16.2%) | 4'349 (26.7%) | 5'897 (36.2%) |
| Adalimumab       | 3'100 (19.0%) | 0 (0.0%)    | 0 (0.0%)     | 0 (0.0%)     | 64 (2.4%)     | 1'256 (28.9%) | 1'780 (30.2%) |
| Bevacizumab      | 306 (1.9%)    | 0 (0.0%)    | 0 (0.0%)     | 0 (0.0%)     | 0 (0.0%)      | 21 (0.5%)     | 285 (4.8%)    |
| Enoxaparin       | 41 (0.3%)     | 0 (0.0%)    | 0 (0.0%)     | 0 (0.0%)     | 0 (0.0%)      | 3 (0.1%)      | 38 (0.6%)     |
| Epoetin alfa     | 844 (5.2%)    | 32 (4.2%)   | 114 (10.6%)  | 257 (16.3%)  | 369 (14.0%)   | 55 (1.3%)     | 17 (0.3%)     |
| Etanercept       | 930 (5.7%)    | 0 (0.0%)    | 0 (0.0%)     | 23 (1.5%)    | 247 (9.3%)    | 377 (8.7%)    | 283 (4.8%)    |
| Filgrastim       | 5'894 (36.2%) | 695 (92.2%) | 752 (70.2%)  | 897 (56.8%)  | 1'110 (42.0%) | 1'142 (26.3%) | 1'298 (22.0%) |
| Follitropin alfa | 583 (3.6%)    | 0 (0.0%)    | 0 (0.0%)     | 0 (0.0%)     | 74 (2.8%)     | 210 (4.8%)    | 299 (5.1%)    |
| Infliximab       | 1'507 (9.2%)  | 23 (3.1%)   | 115 (10.7%)  | 274 (17.4%)  | 278 (10.5%)   | 374 (8.6%)    | 443 (7.5%)    |
| Insulin glargin  | 509 (3.1%)    | 0 (0.0%)    | 80 (7.5%)    | 126 (8.0%)   | 143 (5.4%)    | 98 (2.3%)     | 62 (1.1%)     |
| Pegfilgrastim    | 406 (2.5%)    | 0 (0.0%)    | 0 (0.0%)     | 0 (0.0%)     | 0 (0.0%)      | 125 (2.9%)    | 281 (4.8%)    |
| Rituximab        | 1'763 (10.8%) | 0 (0.0%)    | 0 (0.0%)     | 0 (0.0%)     | 356 (13.5%)   | 564 (13.0%)   | 843 (14.3%)   |
| Somatropin       | 16 (0.1%)     | 4 (0.5%)    | 10 (0.9%)    | 1 (0.1%)     | 1 (0.0%)      | 0 (0.0%)      | 0 (0.0%)      |
| Teriparatid      | 297 (1.8%)    | 0 (0.0%)    | 0 (0.0%)     | 0 (0.0%)     | 2 (0.1%)      | 114 (2.6%)    | 181 (3.1%)    |
| Trastuzumab      | 97 (0.6%)     | 0 (0.0%)    | 0 (0.0%)     | 0 (0.0%)     | 0 (0.0%)      | 10 (0.2%)     | 87 (1.5%)     |

Table A6 Biosimilars quota by active substance

| Active substance | Avg. relative Price difference | Biosimilars quota (IP+RP) |       |       |       |       |       |
|------------------|--------------------------------|---------------------------|-------|-------|-------|-------|-------|
|                  |                                | 2016                      | 2017  | 2018  | 2019  | 2020  | 2021  |
| Adalimumab       | 24.63                          | -                         | -     | -     | 52.21 | 46.2  | 50.5  |
| Bevacizumab      | 23.98                          | -                         | -     | -     | -     | 4.31  | 14.62 |
| Enoxaparin       | 7.77                           | -                         | -     | -     | -     | <1    | <1    |
| Epoetin alfa     | 8.91                           | 3.1                       | 21.85 | 38.21 | 62.9  | 11.51 | 4.94  |
| Etanercept       | 24.52                          | -                         | -     | 20.63 | 44.78 | 65.4  | 58.72 |

## Confidential

|                  |       |       |       |       |       |       |       |
|------------------|-------|-------|-------|-------|-------|-------|-------|
| Filgrastim       | 9.73  | 62.37 | 64.54 | 70.04 | 80.13 | 74.46 | 80.43 |
| Follitropin alfa | 22.76 | -     | -     | 1.64  | 14.29 | 26.31 | 26.43 |
| Infliximab       | 9.85  | 4.2   | 15.53 | 39.34 | 39.81 | 46.38 | 48.56 |
| Insulin glargin  | 16.43 | -     | 33.62 | 37.35 | 24.41 | 37.3  | 34.62 |
| Pegfilgrastim    | 48.61 | -     | -     | -     | -     | 14.52 | 30.88 |
| Rituximab        | 19.27 | -     | -     | <1    | 23.93 | 40.81 | 47.06 |
| Somatropin       | 9.53  | 87.5  | 84.62 | 100   | 20    | 0     | -     |
| Teriparatid      | 17.44 | -     | -     | -     | 4.29  | 11.84 | 17.36 |
| Trastuzumab      | 17.98 | -     | -     | -     | -     | <1    | 6.02  |

Table A7 Frequency of medication switches by active substance

| Category                      | Active substance | Proportion to all switches (%) |         |        |         |
|-------------------------------|------------------|--------------------------------|---------|--------|---------|
|                               |                  | RP to RP                       | RP to B | B to B | B to RP |
| Fusion proteins               | Etanercept       | 0.27                           | 4.4     | 0.29   | 1.59    |
| Hormones                      | Follitropin alfa | 9.41                           | 5.35    | 8.1    | 5.84    |
| Hormones                      | Insulin glargin  | 0.27                           | 2.95    | 0.17   | 2.72    |
| Hormones                      | Somatropin       | 0.02                           | 0.07    | 0      | 0       |
| Hormones                      | Teriparatid      | 0.21                           | 1.42    | 1.34   | 2.51    |
| Monoclonal antibodies         | Adalimumab       | 4.52                           | 4.04    | 1.75   | 4.63    |
| Monoclonal antibodies         | Bevacizumab      | 11.38                          | 1.67    | 4.31   | 5.98    |
| Monoclonal antibodies         | Infliximab       | 1.86                           | 8.95    | 2.33   | 6.4     |
| Monoclonal antibodies         | Rituximab        | 21.81                          | 11.75   | 31.24  | 13.05   |
| Monoclonal antibodies         | Trastuzumab      | 6.94                           | 1.02    | 1.52   | 7.89    |
| Low-molecular-weight heparins | Enoxaparin       | 25.57                          | 0.65    | 0.06   | 30.88   |
| Growth factors                | Epoetin alfa     | 14.22                          | 1.16    | 24.94  | 1.17    |
| Growth factors                | Filgrastim       | 2.4                            | 50.75   | 21.5   | 8.07    |
| Growth factors                | Pegfilgrastim    | 1.13                           | 5.82    | 2.45   | 9.27    |

Table A8 Three models (A-C) assessing determinants of biosimilar first prescription (logistic regression)

| Variables          | Model A:<br>sociodemographic<br>variables | Model B:<br>Model A +<br>medication variables | Model C:<br>Model B +<br>provider variables |
|--------------------|-------------------------------------------|-----------------------------------------------|---------------------------------------------|
|                    | OR [95%CI]                                | OR [95%CI]                                    | OR [95%CI]                                  |
| Intercept          | 0.429 [0.355, 0.518]                      | 0.831 [0.49, 1.402]                           | 0.706 [0.399, 1.241]                        |
| Year:              |                                           |                                               |                                             |
| 2016 (reference)   |                                           |                                               |                                             |
| 2017               | 1.381 [1.129, 1.692]                      | 1.602 [1.246, 2.062]                          | 1.594 [1.233, 2.064]                        |
| 2018               | 1.354 [1.113, 1.648]                      | 1.983 [1.551, 2.539]                          | 1.934 [1.503, 2.492]                        |
| 2019               | 1.493 [1.246, 1.793]                      | 2.64 [2.094, 3.332]                           | 2.602 [2.054, 3.302]                        |
| 2020               | 0.42 [0.356, 0.497]                       | 2.203 [1.755, 2.769]                          | 2.232 [1.769, 2.819]                        |
| 2021               | 0.302 [0.256, 0.355]                      | 3.077 [2.452, 3.867]                          | 3.012 [2.388, 3.806]                        |
| Sex:               |                                           |                                               |                                             |
| Female (reference) |                                           |                                               |                                             |
| Male               | 0.998 [0.922, 1.081]                      | 1.137 [1.02, 1.267]                           | 1.132 [1.014, 1.263]                        |

## Confidential

|                                                |                      |                       |                       |
|------------------------------------------------|----------------------|-----------------------|-----------------------|
| Age:                                           |                      |                       |                       |
| <50 (reference)                                |                      |                       |                       |
| 50-64                                          | 1.302 [1.169, 1.452] | 1.005 [0.867, 1.164]  | 1.022 [0.881, 1.185]  |
| 65-74                                          | 1.571 [1.401, 1.761] | 1.044 [0.889, 1.227]  | 1.044 [0.887, 1.228]  |
| >74                                            | 0.961 [0.849, 1.086] | 0.825 [0.694, 0.98]   | 0.864 [0.725, 1.03]   |
| Language region                                |                      |                       |                       |
| German (reference)                             |                      |                       |                       |
| French                                         | 0.578 [0.521, 0.64]  | 0.582 [0.51, 0.664]   | 0.611 [0.532, 0.7]    |
| Italian                                        | 0.467 [0.397, 0.546] | 0.744 [0.601, 0.918]  | 0.761 [0.612, 0.942]  |
| Number of comorbidity:                         |                      |                       |                       |
| 0 (reference)                                  |                      |                       |                       |
| 1                                              | 1.054 [0.932, 1.191] | 0.934 [0.796, 1.094]  | 0.95 [0.81, 1.115]    |
| 2                                              | 1.095 [0.963, 1.244] | 1.041 [0.88, 1.23]    | 1.05 [0.886, 1.243]   |
| >2                                             | 0.938 [0.837, 1.051] | 1.05 [0.904, 1.22]    | 1.08 [0.928, 1.256]   |
| Deductible:                                    |                      |                       |                       |
| Low (reference)                                |                      |                       |                       |
| High                                           | 1.067 [0.954, 1.192] | 1.005 [0.868, 1.163]  | 0.998 [0.861, 1.155]  |
| Managed care                                   | 1.029 [0.949, 1.116] | 1.103 [0.992, 1.226]  | 1.095 [0.984, 1.22]   |
| Category:                                      |                      |                       |                       |
| Fusion proteins (reference)                    |                      |                       |                       |
| Hormones                                       |                      | 1.297 [0.816, 2.081]  | 1.281 [0.803, 2.06]   |
| Monoclonal antibodies                          |                      | 0.152 [0.116, 0.199]  | 0.115 [0.087, 0.152]  |
| Low-molecular-weight heparins                  |                      | 0.001 [0.001, 0.001]  | 0.001 [0, 0.001]      |
| Growth factors                                 |                      | 0.235 [0.168, 0.327]  | 0.158 [0.112, 0.222]  |
| Multiple package size                          |                      | 4.551 [3.808, 5.461]  | 4.64 [3.876, 5.575]   |
| Cost per package of reference product (in CHF) |                      |                       |                       |
| <100                                           |                      |                       |                       |
| 100-599                                        |                      | 0.254 [0.185, 0.349]  | 0.202 [0.145, 0.28]   |
| >600                                           |                      | 0.853 [0.592, 1.236]  | 0.657 [0.453, 0.957]  |
| Relative price difference (%)                  |                      |                       |                       |
| <10                                            |                      |                       |                       |
| 10-19                                          |                      | 0.091 [0.072, 0.115]  | 0.076 [0.059, 0.096]  |
| >20                                            |                      | 0.067 [0.053, 0.084]  | 0.067 [0.054, 0.084]  |
| Number of available imitator drug:             |                      |                       |                       |
| 1 (reference)                                  |                      |                       |                       |
| 2                                              |                      | 2.15 [1.671, 2.785]   | 2.363 [1.819, 3.093]  |
| >2                                             |                      | 8.143 [6.502, 10.248] | 9.649 [7.614, 12.303] |
| Suppl                                          |                      |                       |                       |
| General practitioner (reference)               |                      |                       |                       |
| Outpatient hospital                            |                      |                       | 2.477 [1.887, 3.28]   |
| Specialist                                     |                      |                       | 1.417 [1.075, 1.884]  |
| Traditional pharmacy                           |                      |                       | 1.207 [0.911, 1.611]  |
| Rest                                           |                      |                       | 0.998 [0.609, 1.606]  |
| Observations                                   | 18'953               | 18'953                | 18'953                |
| AIC                                            | 16'588               | 9'868                 | 9'735                 |
| BIC                                            | 16'722               | 10'088                | 9'986                 |
